# Supplementary material
Source: PubMed Central journal article supplement (PMC6384130)
Supplement: NIHMS1500785-supplement-OTHER_MATERIALS.pdf [file NIHMS1500785-supplement-OTHER_MATERIALS.pdf]

## SUPPORTING INFORMATION

### **Targeted metabolomics reveals metabolomic signatures correlating gastrointestinal tissue to plasma in a mouse total-body irradiation model.**

Jace W. Jones,\* Zachary Clifford, \* Fei Li,\* Gregory Tudor,† Ann M. Farese,‡ Catherine Booth,† Thomas J. MacVittie,‡ and Maureen A. Kane\*

\*University of Maryland, School of Pharmacy, Department of Pharmaceutical Sciences, Baltimore, MD; †Epistem Ltd, Manchester, UK; ‡University of Maryland, School of Medicine, Department of Radiation Oncology, Baltimore, MD

#### **Correspondence:**

Maureen A. Kane  
University of Maryland, School of Pharmacy  
Department of Pharmaceutical Sciences  
20 N. Pine Street, Room 723  
Baltimore, MD 21201  
Phone: (410) 706-5097  
Fax: (410) 706-0886  
Email: [mkane@rx.umaryland.edu](mailto:mkane@rx.umaryland.edu)

## SUPPORTING INFORMATION FIGURES

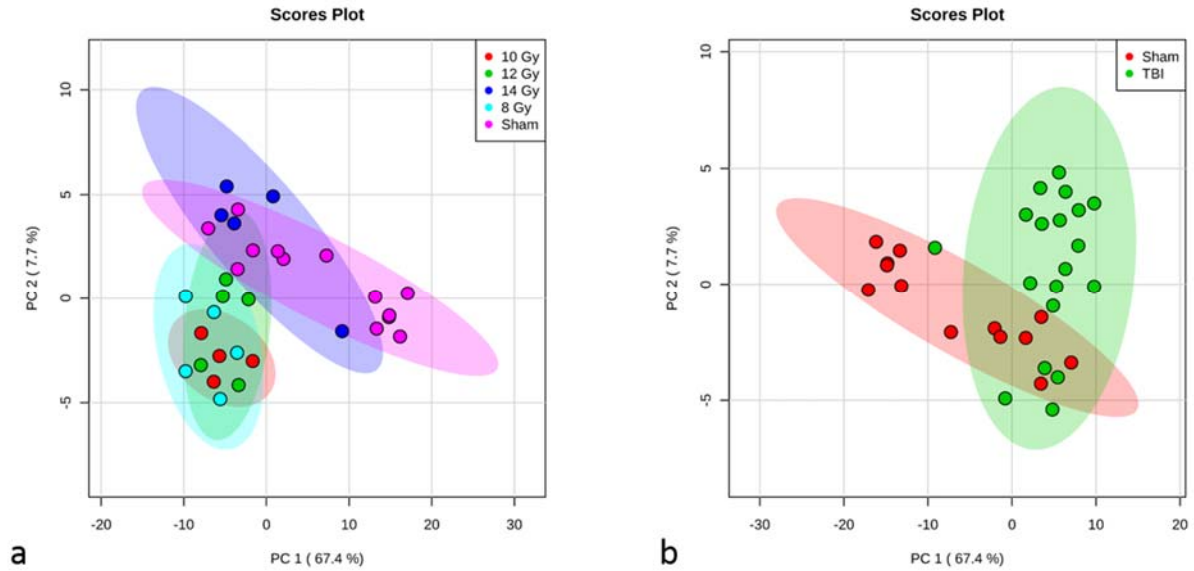

**Figure S1.** Day 1 jejenum metabolomics: (a) PCA plot comparing sham and individual TBI doses. (b) PCA plot comparing sham and combined TBI doses. For PCA plots, each point represents a data set from an individual animal. The 95% confidence intervals are indicated by elliptical shaded areas per group. Data were sum normalized, log transformed, and mean centered. PCA plots generated using MetaboAnalyst.

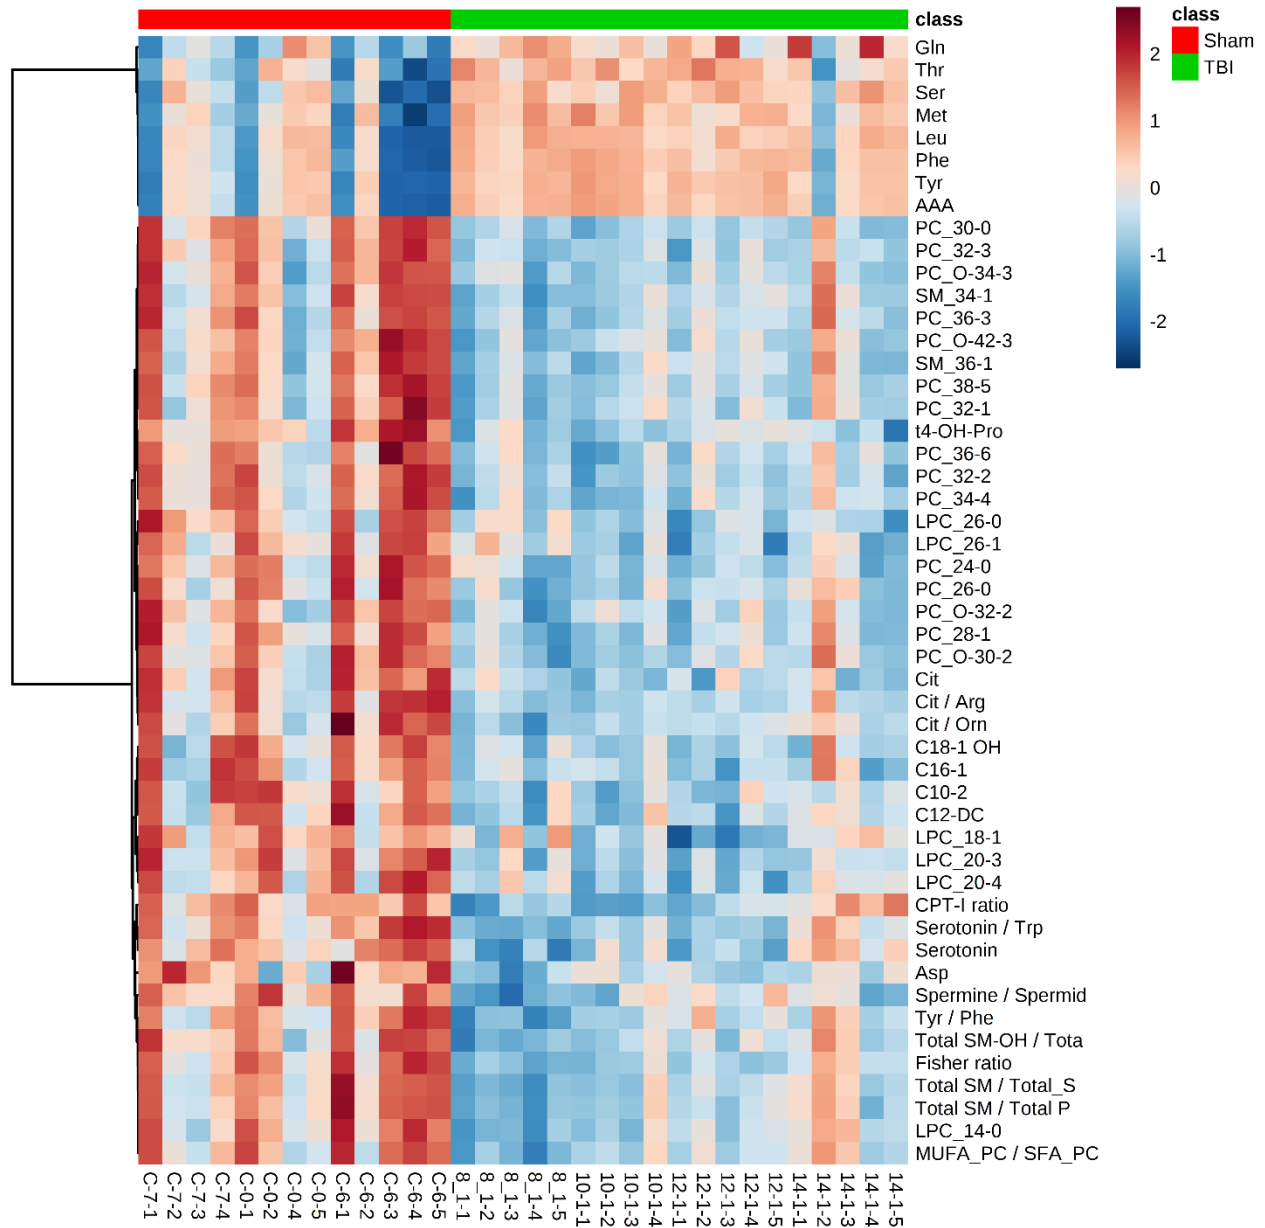

**Figure S2.** Day 1 jejenum metabolomics: heatmap representing top 50 most significant metabolites differentially expressed between sham and combined TBI doses. Significance was determined by t-test and heatmap was constructed with Pearson distance measuring, Ward clustering, and processed data (sum normalized, log transformed, and mean centered). Heatmap generated using MetaboAnalyst.

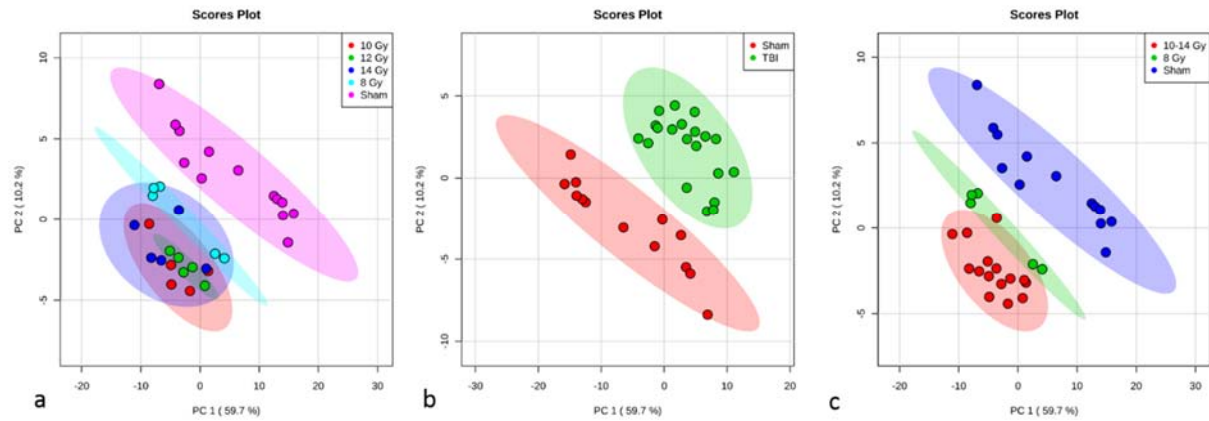

**Figure S3.** Day 3 jejenum metabolomics: (a) PCA plot comparing sham and individual TBI doses. (b) PCA plot comparing sham and combined TBI doses. (c) PCA plot comparing sham, 8 Gy, and 10-14 Gy TBI doses. For PCA plots, each point represents a data set from an individual animal. The 95% confidence intervals are indicated by elliptical shaded areas per group. Data were sum normalized, log transformed, and mean centered. PCA plots generated using MetaboAnalyst.

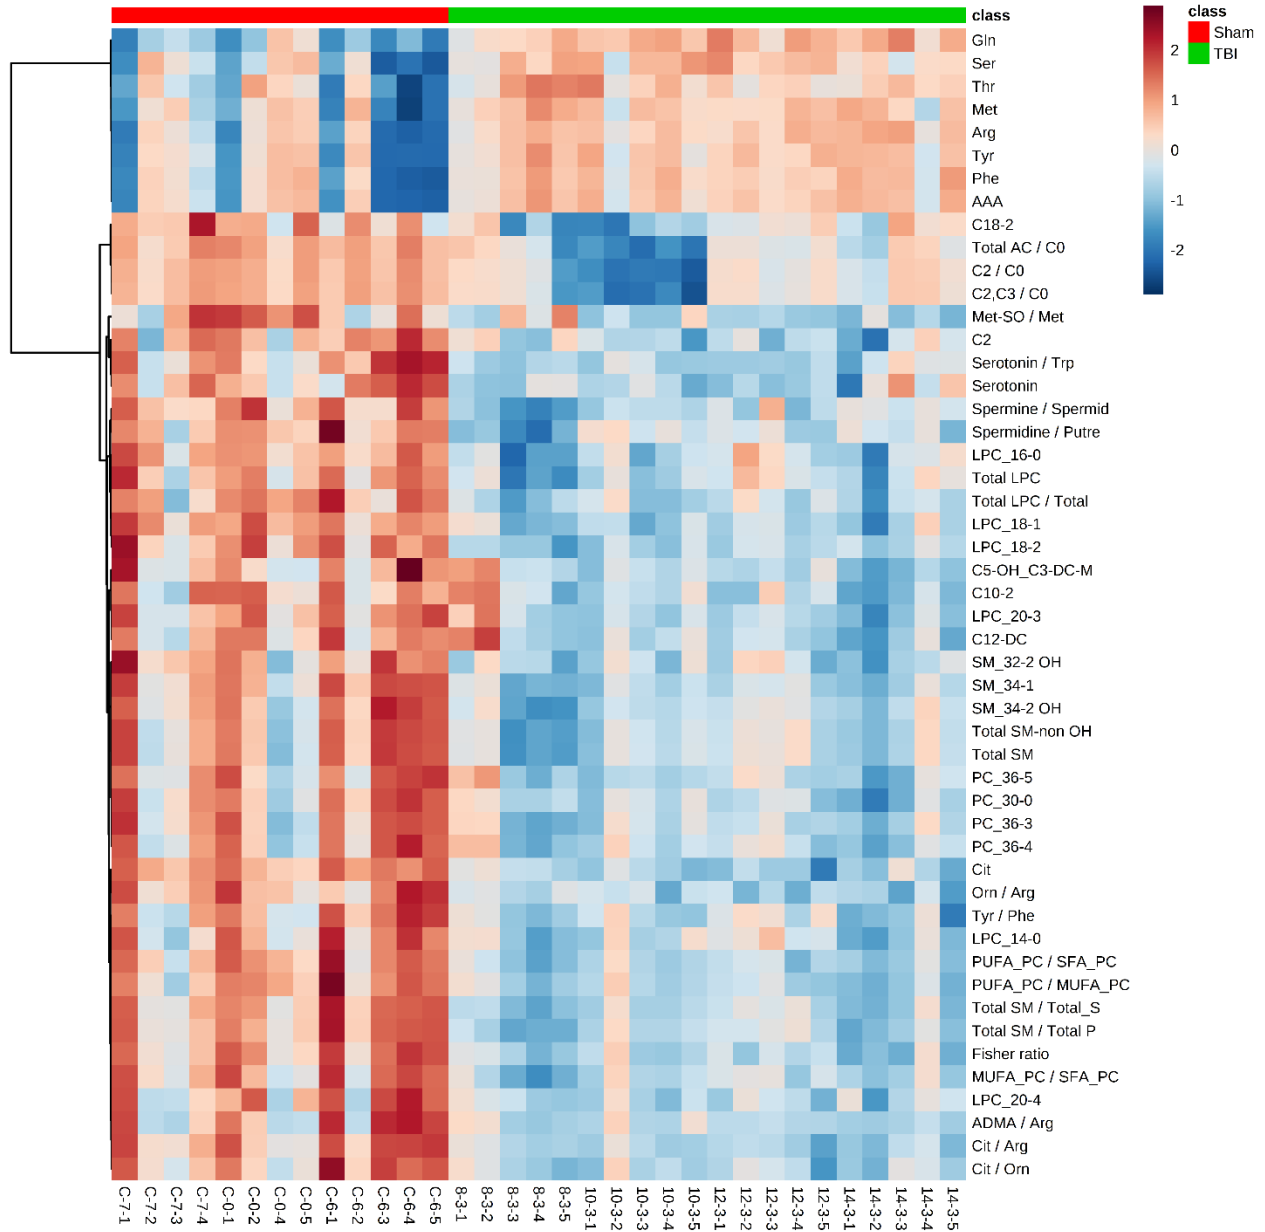

**Figure S4.** Day 3 jejunum metabolomics: heatmap representing top 50 most significant metabolites differentially expressed between sham and combined TBI doses. Significance was determined by t-test and heatmap was constructed with Pearson distance measuring, Ward clustering, and processed data (sum normalized, log transformed, and mean centered). Heatmap generated using MetaboAnalyst.

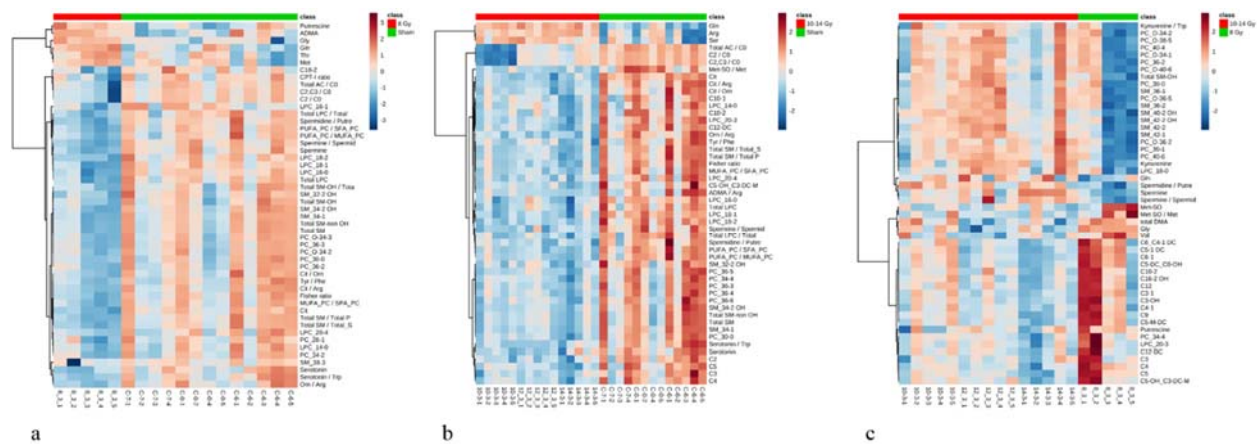

**Figure S5.** Day 3 jejunum metabolomics: heatmaps representing top 50 most significant metabolites differentially expressed between a) sham and 8 Gy, b) sham and 10-14 Gy, and c) 8 Gy and 10-14 Gy. Significance was determined by t-test and heatmap was constructed with Pearson distance measuring, Ward clustering, and processed data (sum normalized, log transformed, and mean centered). Heatmaps generated using MetaboAnalyst.

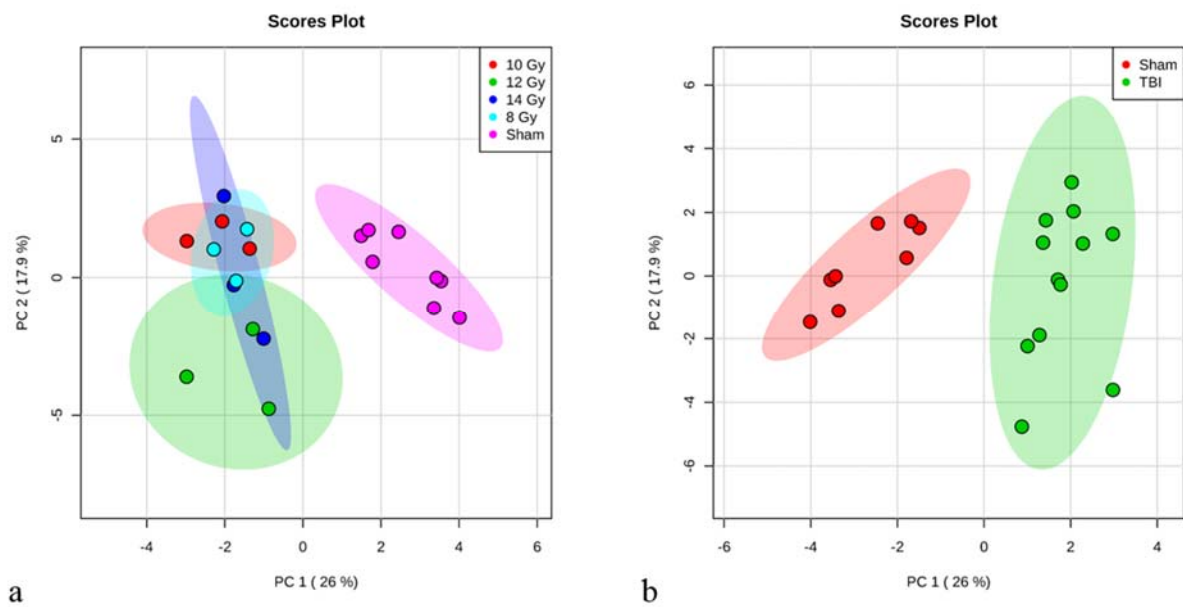

**Figure S6.** Day 1 plasma metabolomics: (a) PCA plot comparing sham and individual TBI doses. (b) PCA plot comparing sham and combined TBI doses. For PCA plots, each point represents a data set from an individual animal. The 95% confidence intervals are indicated by elliptical shaded areas per group. Data were sum normalized, log transformed, and mean centered. PCA plots generated using MetaboAnalyst.

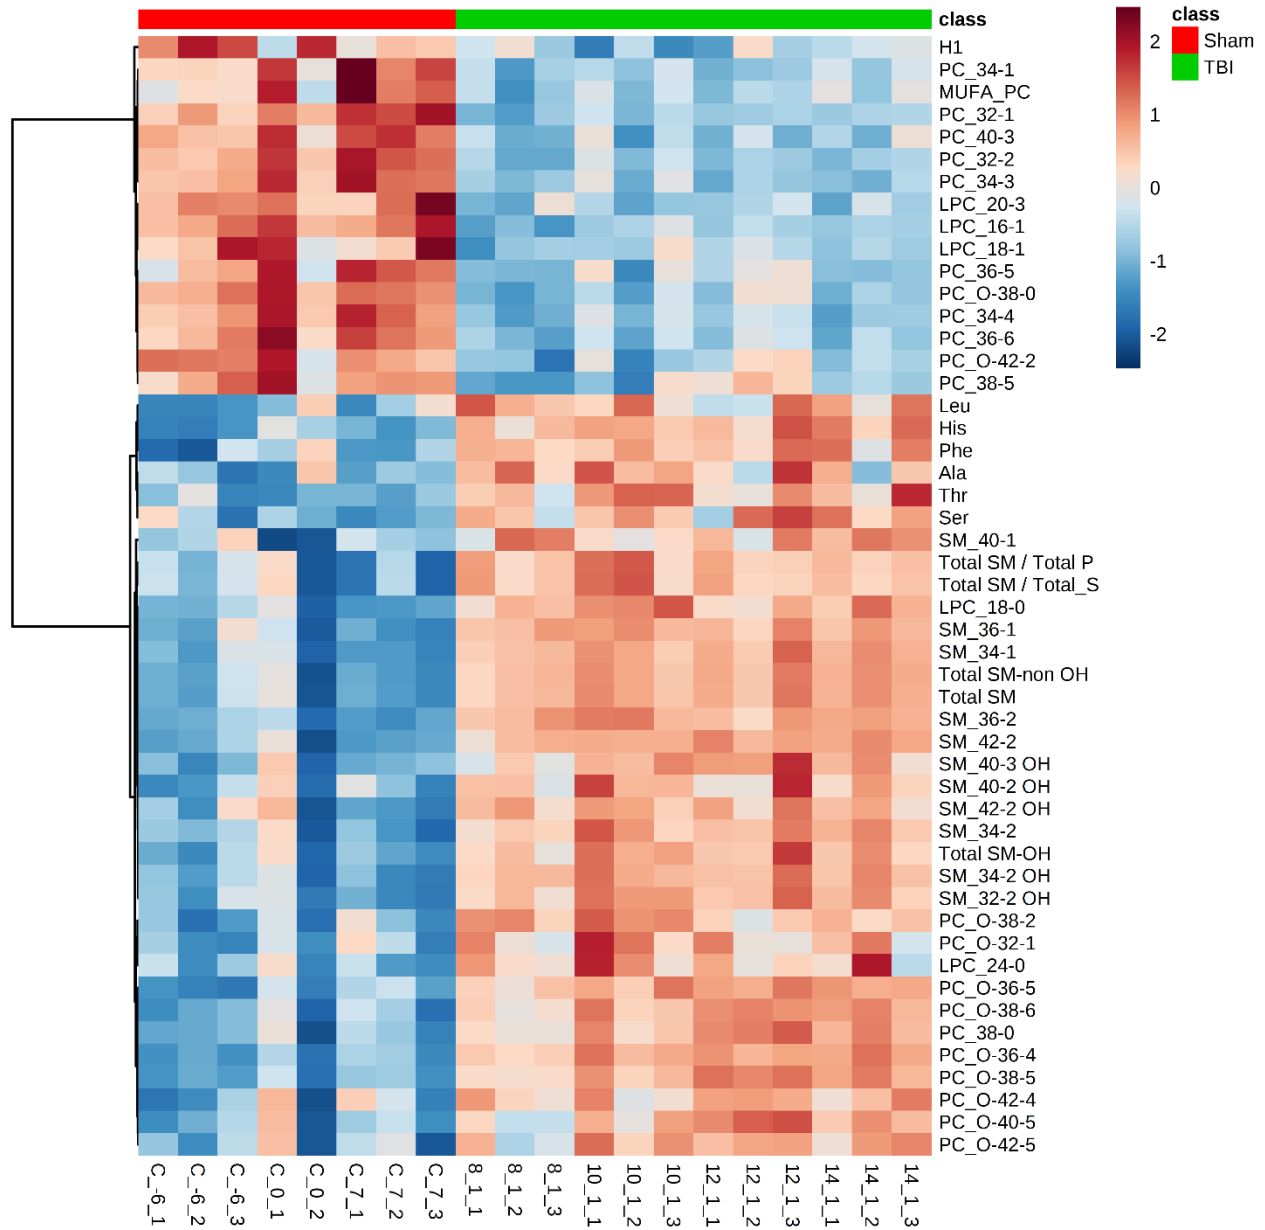

**Figure S7.** Day 1 plasma metabolomics: heatmap representing top 50 most significant metabolites differentially expressed between sham and combined TBI doses. Significance was determined by t-test and heatmap was constructed with Pearson distance measuring, Ward clustering, and processed data (sum normalized, log transformed, and mean centered). Heatmap generated using MetaboAnalyst.

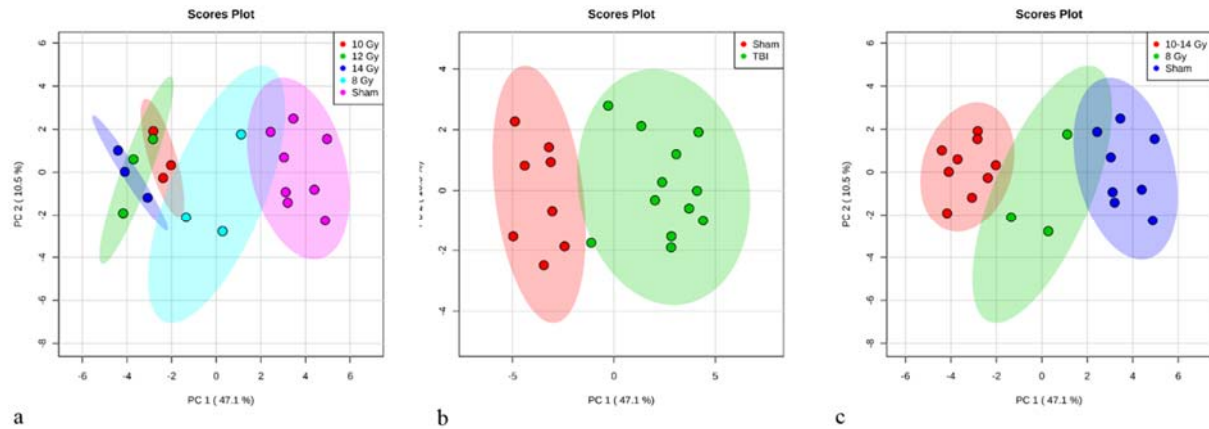

**Figure S8.** Day 3 plasma metabolomics: (a) PCA plot comparing sham and individual TBI doses. (b) PCA plot comparing sham and combined TBI doses. (c) PCA plot comparing sham, 8 Gy, and 10-14 Gy TBI doses. For PCA plots, each point represents a data set from an individual animal. The 95% confidence intervals are indicated by elliptical shaded areas per group. Data were sum normalized, log transformed, and mean centered. PCA plots generated using MetaboAnalyst.



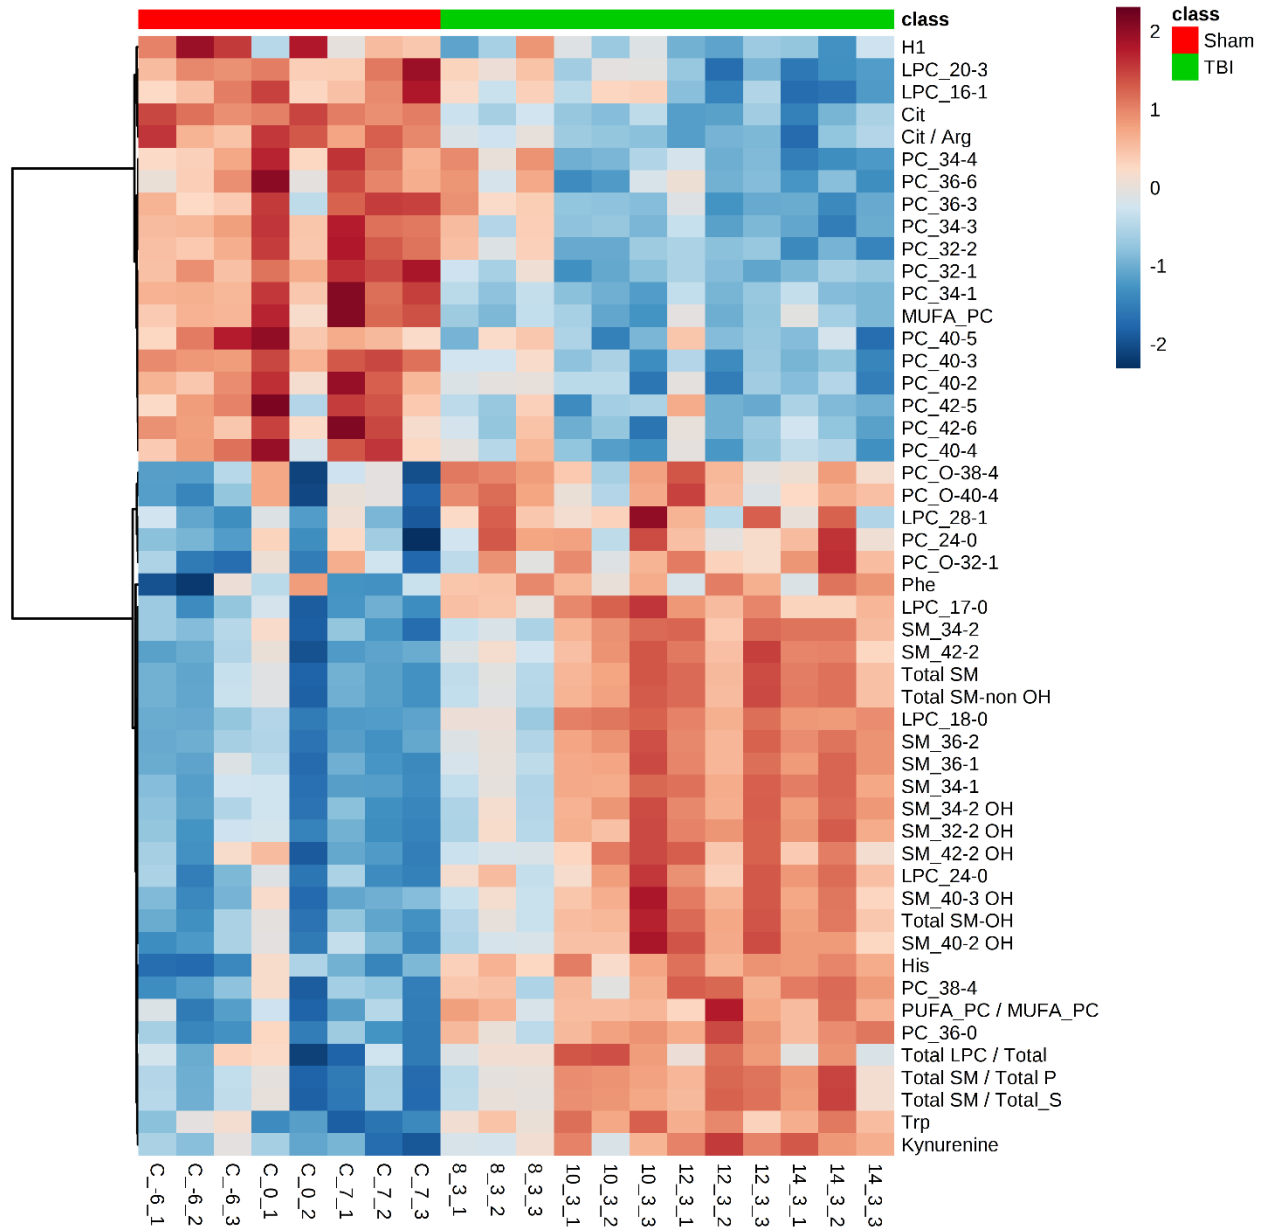

**Figure S9.** Day 3 plasma metabolomics: heatmap representing top 50 most significant metabolites differentially expressed between sham and combined TBI doses. Significance was determined by t-test and heatmap was constructed with Pearson distance measuring, Ward clustering, and processed data (sum normalized, log transformed, and mean centered). Heatmap generated using MetaboAnalyst.

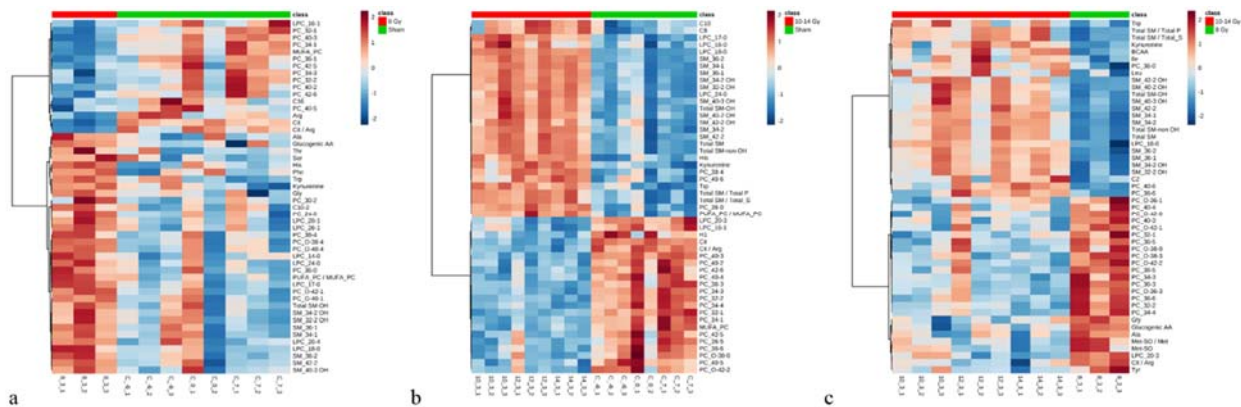

**Figure S10.** Day 3 plasma metabolomics: heatmaps representing top 50 most significant metabolites differentially expressed between a) sham and 8 Gy, b) sham and 10-14 Gy, and c) 8 Gy and 10-14 Gy. Significance was determined by t-test and heatmap was constructed with Pearson distance measuring, Ward clustering, and processed data (sum normalized, log transformed, and mean centered). Heatmaps generated using MetaboAnalyst.

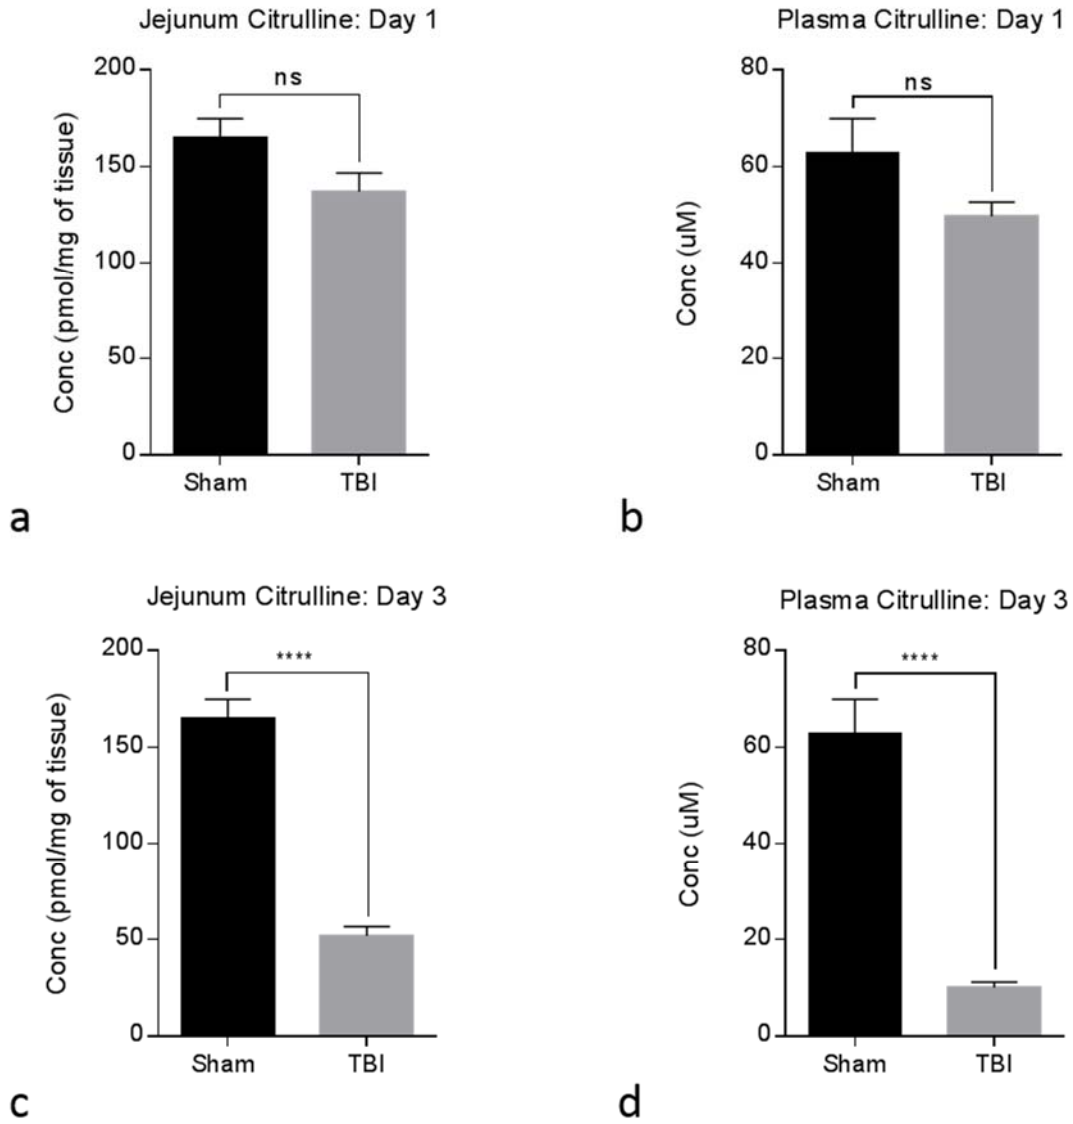

**Figure S11.** Day 1 and Day 3 jejunum tissue to plasma correlation for citrulline comparing sham to combined TBI doses: (a) jejunum citrulline day 1, (b) plasma citrulline day 1, (c) jejunum citrulline day 3, (d) plasma citrulline day 3. Bar graph data are mean  $\pm$  SEM, ns= nonsignificant,  $p > 0.05$ ,  $*p < 0.05$ ,  $**p < 0.01$ ,  $***p < 0.005$ ,  $****p < 0.0001$ .

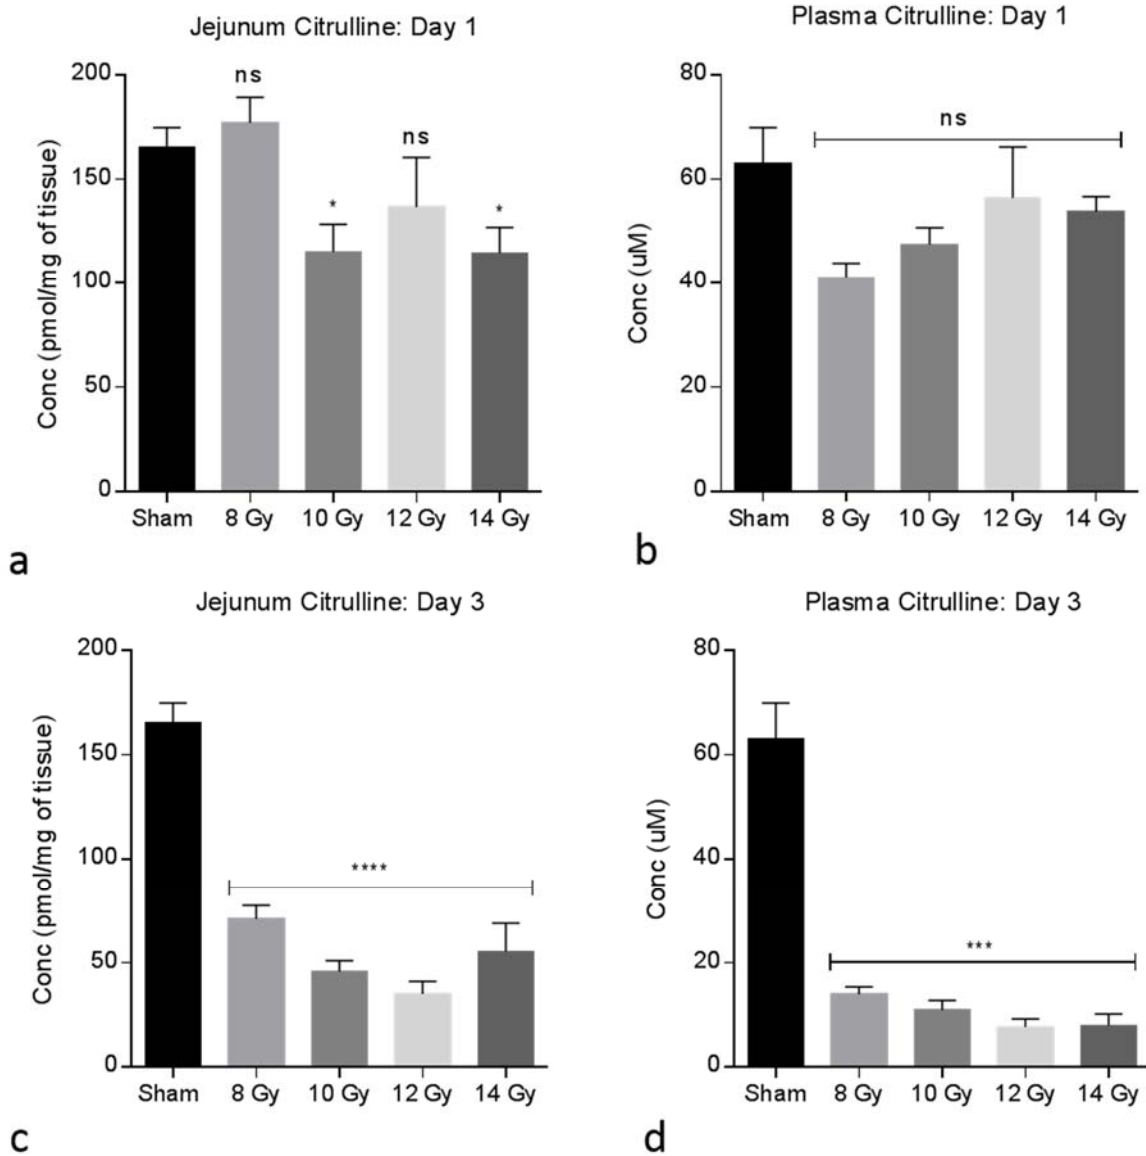

**Figure S12.** Day 1 and Day 3 jejunum tissue to plasma correlation for citrulline comparing sham to 8, 10, 12, and 14 Gy TBI doses: (a) jejunum citrulline day 1, (b) plasma citrulline day 1, (c) jejunum citrulline day 3, (d) plasma citrulline day 3. Bar graph data are mean  $\pm$  SEM, ns=nonsignificant,  $p > 0.05$ ,  $*p < 0.05$ ,  $**p < 0.01$ ,  $***p < 0.005$ ,  $****p < 0.0001$ .

## SUPPORTING INFORMATION TABLES

**Jejunum**

**Day Post-IR**

|                      |                        | Sham | 1 | 3 | Total # of Mice per dose |
|----------------------|------------------------|------|---|---|--------------------------|
| <b>TBI Dose (Gy)</b> | Control                | 13   |   |   | 13                       |
|                      | 8                      |      | 5 | 5 | 10                       |
|                      | 10                     |      | 4 | 5 | 9                        |
|                      | 12                     |      | 5 | 5 | 10                       |
|                      | 14                     |      | 5 | 5 | 10                       |
|                      | <b>Total # of Mice</b> |      |   |   |                          |

**a**

**Plasma**

**Day Post-IR**

|                      |                        | Sham | 1 | 3 | Total # of Mice per dose |
|----------------------|------------------------|------|---|---|--------------------------|
| <b>TBI Dose (Gy)</b> | Control                | 8    |   |   | 8                        |
|                      | 8                      |      | 3 | 3 | 6                        |
|                      | 10                     |      | 3 | 3 | 6                        |
|                      | 12                     |      | 3 | 3 | 6                        |
|                      | 14                     |      | 3 | 3 | 6                        |
|                      | <b>Total # of Mice</b> |      |   |   |                          |

**b**

**Table S1.** Tabular representation of the radiological doses, time points, and number of mice.

|    |               | Sham    |        |    | 8 Gy    |        |   | 10 Gy   |        |   | 12 Gy   |        |   | 14 Gy   |        |   |
|----|---------------|---------|--------|----|---------|--------|---|---------|--------|---|---------|--------|---|---------|--------|---|
|    |               | Mean    | SEM    | N  | Mean    | SEM    | N | Mean    | SEM    | N | Mean    | SEM    | N | Mean    | SEM    | N |
| 1  | C0            | 249.68  | 10.83  | 13 | 282.73  | 14.78  | 5 | 255.03  | 16.10  | 4 | 266.02  | 12.91  | 5 | 246.62  | 49.32  | 5 |
| 2  | C10           | 0.71    | 0.05   | 13 | 1.04    | 0.11   | 5 | 0.63    | 0.04   | 4 | 0.57    | 0.04   | 5 | 0.58    | 0.01   | 5 |
| 3  | C10-1         | 0.70    | 0.03   | 13 | 0.87    | 0.07   | 5 | 0.68    | 0.04   | 4 | 0.66    | 0.04   | 5 | 0.68    | 0.02   | 5 |
| 4  | C10-2         | 0.46    | 0.02   | 13 | 0.56    | 0.04   | 5 | 0.42    | 0.02   | 4 | 0.44    | 0.04   | 5 | 0.42    | 0.03   | 5 |
| 5  | C12           | 0.69    | 0.06   | 13 | 1.07    | 0.06   | 5 | 0.65    | 0.10   | 4 | 0.53    | 0.06   | 5 | 0.53    | 0.05   | 5 |
| 6  | C12-DC        | 1.49    | 0.04   | 13 | 1.92    | 0.12   | 5 | 1.55    | 0.06   | 4 | 1.46    | 0.05   | 5 | 1.48    | 0.06   | 5 |
| 7  | C12-1         | 0.64    | 0.02   | 13 | 0.84    | 0.04   | 5 | 0.68    | 0.04   | 4 | 0.68    | 0.04   | 5 | 0.64    | 0.02   | 5 |
| 8  | C14           | 1.01    | 0.07   | 13 | 1.83    | 0.10   | 5 | 1.23    | 0.05   | 4 | 1.13    | 0.11   | 5 | 1.20    | 0.12   | 5 |
| 9  | C14-1         | 0.26    | 0.02   | 13 | 0.36    | 0.02   | 5 | 0.27    | 0.02   | 4 | 0.22    | 0.02   | 5 | 0.23    | 0.01   | 5 |
| 10 | C14-1 OH      | 0.32    | 0.03   | 13 | 0.47    | 0.02   | 5 | 0.34    | 0.03   | 4 | 0.28    | 0.03   | 5 | 0.26    | 0.02   | 5 |
| 11 | C14-2         | 0.17    | 0.01   | 13 | 0.23    | 0.02   | 5 | 0.16    | 0.02   | 4 | 0.22    | 0.05   | 5 | 0.15    | 0.01   | 5 |
| 12 | C14-2 OH      | 0.21    | 0.02   | 13 | 0.34    | 0.02   | 5 | 0.22    | 0.03   | 4 | 0.17    | 0.01   | 5 | 0.17    | 0.01   | 5 |
| 13 | C16           | 2.25    | 0.18   | 13 | 2.77    | 0.07   | 5 | 2.54    | 0.14   | 4 | 2.13    | 0.21   | 5 | 2.60    | 0.35   | 5 |
| 14 | C16-OH        | 0.60    | 0.05   | 13 | 0.70    | 0.05   | 5 | 0.52    | 0.02   | 4 | 0.46    | 0.03   | 5 | 0.56    | 0.17   | 5 |
| 15 | C16-1         | 0.45    | 0.02   | 13 | 0.56    | 0.01   | 5 | 0.47    | 0.02   | 4 | 0.39    | 0.02   | 5 | 0.41    | 0.03   | 5 |
| 16 | C16-1 OH      | 0.35    | 0.03   | 13 | 0.48    | 0.01   | 5 | 0.36    | 0.03   | 4 | 0.28    | 0.02   | 5 | 0.28    | 0.03   | 5 |
| 17 | C16-2         | 0.23    | 0.02   | 13 | 0.34    | 0.02   | 5 | 0.26    | 0.03   | 4 | 0.21    | 0.03   | 5 | 0.21    | 0.02   | 5 |
| 18 | C16-2 OH      | 0.25    | 0.02   | 13 | 0.32    | 0.01   | 5 | 0.25    | 0.02   | 4 | 0.21    | 0.01   | 5 | 0.21    | 0.02   | 5 |
| 19 | C18           | 1.42    | 0.10   | 13 | 1.46    | 0.13   | 5 | 1.35    | 0.18   | 4 | 1.10    | 0.09   | 5 | 1.56    | 0.25   | 5 |
| 20 | C18-1         | 1.01    | 0.10   | 13 | 1.29    | 0.15   | 5 | 1.71    | 0.46   | 4 | 0.92    | 0.13   | 5 | 1.02    | 0.10   | 5 |
| 21 | C18-1 OH      | 0.53    | 0.03   | 13 | 0.57    | 0.03   | 5 | 0.43    | 0.02   | 4 | 0.40    | 0.02   | 5 | 0.43    | 0.06   | 5 |
| 22 | C18-2         | 0.70    | 0.07   | 13 | 0.89    | 0.08   | 5 | 0.83    | 0.16   | 4 | 0.63    | 0.07   | 5 | 0.79    | 0.08   | 5 |
| 23 | C2            | 52.64   | 4.03   | 13 | 44.01   | 4.06   | 5 | 53.01   | 3.98   | 4 | 56.51   | 4.30   | 5 | 76.45   | 11.92  | 5 |
| 24 | C3            | 1.68    | 0.12   | 13 | 1.44    | 0.09   | 5 | 1.76    | 0.37   | 4 | 1.28    | 0.10   | 5 | 1.93    | 0.23   | 5 |
| 25 | C3-DC_C4-OH   | 2.07    | 0.13   | 13 | 2.47    | 0.19   | 5 | 2.51    | 0.06   | 4 | 2.37    | 0.15   | 5 | 2.15    | 0.26   | 5 |
| 26 | C3-OH         | 0.44    | 0.03   | 13 | 0.54    | 0.04   | 5 | 0.41    | 0.02   | 4 | 0.38    | 0.02   | 5 | 0.35    | 0.02   | 5 |
| 27 | C3-1          | 0.34    | 0.04   | 13 | 0.54    | 0.03   | 5 | 0.33    | 0.03   | 4 | 0.26    | 0.03   | 5 | 0.25    | 0.02   | 5 |
| 28 | C4            | 1.19    | 0.10   | 13 | 1.46    | 0.11   | 5 | 1.05    | 0.15   | 4 | 0.73    | 0.09   | 5 | 1.17    | 0.18   | 5 |
| 29 | C4-1          | 0.29    | 0.02   | 13 | 0.44    | 0.03   | 5 | 0.29    | 0.01   | 4 | 0.26    | 0.02   | 5 | 0.22    | 0.01   | 5 |
| 30 | C5            | 1.06    | 0.05   | 13 | 1.53    | 0.05   | 5 | 1.12    | 0.04   | 4 | 1.01    | 0.05   | 5 | 1.23    | 0.10   | 5 |
| 31 | C5-DC_C6-OH   | 0.75    | 0.09   | 13 | 1.37    | 0.07   | 5 | 0.76    | 0.09   | 4 | 0.51    | 0.07   | 5 | 0.49    | 0.04   | 5 |
| 32 | C5-M-DC       | 0.48    | 0.04   | 13 | 0.73    | 0.04   | 5 | 0.54    | 0.04   | 4 | 0.40    | 0.04   | 5 | 0.39    | 0.02   | 5 |
| 33 | C5-OH_C3-DC-M | 1.33    | 0.19   | 13 | 1.47    | 0.16   | 5 | 0.99    | 0.09   | 4 | 0.88    | 0.05   | 5 | 0.87    | 0.08   | 5 |
| 34 | C5-1          | 0.32    | 0.02   | 13 | 0.44    | 0.03   | 5 | 0.32    | 0.02   | 4 | 0.29    | 0.02   | 5 | 0.32    | 0.03   | 5 |
| 35 | C5-1 DC       | 0.91    | 0.14   | 13 | 1.83    | 0.08   | 5 | 0.79    | 0.15   | 4 | 0.39    | 0.06   | 5 | 0.38    | 0.06   | 5 |
| 36 | C6_C4-1 DC    | 0.49    | 0.05   | 13 | 0.79    | 0.06   | 5 | 0.44    | 0.06   | 4 | 0.31    | 0.03   | 5 | 0.32    | 0.03   | 5 |
| 37 | C6-1          | 0.35    | 0.04   | 13 | 0.60    | 0.04   | 5 | 0.30    | 0.03   | 4 | 0.24    | 0.03   | 5 | 0.20    | 0.02   | 5 |
| 38 | C7-DC         | 0.31    | 0.03   | 13 | 0.53    | 0.03   | 5 | 0.38    | 0.03   | 4 | 0.35    | 0.04   | 5 | 0.33    | 0.01   | 5 |
| 39 | C8            | 0.76    | 0.04   | 13 | 1.02    | 0.13   | 5 | 0.68    | 0.03   | 4 | 0.67    | 0.05   | 5 | 0.67    | 0.04   | 5 |
| 40 | C9            | 0.34    | 0.03   | 13 | 0.56    | 0.05   | 5 | 0.32    | 0.03   | 4 | 0.25    | 0.02   | 5 | 0.25    | 0.02   | 5 |
| 41 | Ala           | 4546.15 | 602.59 | 13 | 8664.00 | 486.56 | 5 | 6429.00 | 729.46 | 4 | 5629.20 | 528.17 | 5 | 5757.60 | 752.69 | 5 |
| 42 | Arg           | 486.32  | 119.35 | 13 | 1615.20 | 234.45 | 5 | 1245.00 | 207.56 | 4 | 1130.40 | 68.53  | 5 | 813.24  | 169.97 | 5 |
| 43 | Asn           | 419.82  | 84.21  | 13 | 1167.60 | 117.94 | 5 | 831.00  | 79.16  | 4 | 812.28  | 148.67 | 5 | 657.72  | 106.00 | 5 |
| 44 | Asp           | 1390.62 | 120.84 | 13 | 1638.00 | 119.38 | 5 | 1578.00 | 133.56 | 4 | 1362.00 | 85.42  | 5 | 1314.00 | 86.18  | 5 |
| 45 | Cit           | 165.18  | 9.75   | 13 | 177.12  | 12.35  | 5 | 115.35  | 13.02  | 4 | 136.68  | 23.78  | 5 | 114.72  | 12.19  | 5 |
| 46 | Gln           | 826.48  | 133.87 | 13 | 2193.60 | 242.02 | 5 | 1513.50 | 160.76 | 4 | 1657.20 | 299.40 | 5 | 1666.80 | 418.37 | 5 |
| 47 | Glu           | 3498.92 | 169.01 | 13 | 4321.20 | 241.46 | 5 | 4033.50 | 139.91 | 4 | 3861.60 | 84.31  | 5 | 5060.40 | 496.88 | 5 |
| 48 | Gly           | 2814.92 | 247.64 | 13 | 6817.20 | 306.03 | 5 | 4408.50 | 563.87 | 4 | 4081.20 | 311.28 | 5 | 2724.00 | 349.42 | 5 |

|    |            |         |        |    |         |        |   |         |        |   |         |        |   |         |        |   |
|----|------------|---------|--------|----|---------|--------|---|---------|--------|---|---------|--------|---|---------|--------|---|
| 49 | His        | 224.12  | 41.24  | 13 | 703.92  | 147.69 | 5 | 464.85  | 70.71  | 4 | 414.24  | 54.92  | 5 | 393.72  | 78.52  | 5 |
| 50 | Ile        | 558.83  | 117.46 | 13 | 1624.80 | 206.57 | 5 | 1338.00 | 170.29 | 4 | 1081.20 | 132.78 | 5 | 910.56  | 185.03 | 5 |
| 51 | Leu        | 1058.54 | 229.30 | 13 | 3327.60 | 447.13 | 5 | 2547.00 | 314.16 | 4 | 2157.60 | 261.17 | 5 | 1923.60 | 399.12 | 5 |
| 52 | Lys        | 574.85  | 113.52 | 13 | 1834.80 | 272.97 | 5 | 1291.50 | 168.77 | 4 | 1082.40 | 85.46  | 5 | 768.36  | 142.71 | 5 |
| 53 | Met        | 344.03  | 67.12  | 13 | 1059.60 | 132.88 | 5 | 855.15  | 132.34 | 4 | 691.68  | 51.95  | 5 | 539.40  | 102.98 | 5 |
| 54 | Orn        | 36.69   | 8.18   | 13 | 132.12  | 29.21  | 5 | 62.24   | 7.00   | 4 | 59.95   | 11.24  | 5 | 43.54   | 8.17   | 5 |
| 55 | Phe        | 518.77  | 108.85 | 13 | 1594.80 | 169.68 | 5 | 1375.50 | 170.17 | 4 | 1123.20 | 91.40  | 5 | 902.40  | 179.08 | 5 |
| 56 | Pro        | 808.25  | 144.52 | 13 | 2110.80 | 143.60 | 5 | 1452.00 | 113.87 | 4 | 1381.20 | 196.32 | 5 | 1267.20 | 258.52 | 5 |
| 57 | Ser        | 1156.66 | 221.72 | 13 | 3174.00 | 350.67 | 5 | 2487.00 | 264.14 | 4 | 2398.80 | 230.55 | 5 | 2018.40 | 386.79 | 5 |
| 58 | Thr        | 751.85  | 116.56 | 13 | 2163.60 | 224.57 | 5 | 1639.50 | 145.77 | 4 | 1640.40 | 106.84 | 5 | 1107.12 | 188.36 | 5 |
| 59 | Trp        | 91.64   | 20.20  | 13 | 269.76  | 34.86  | 5 | 233.55  | 36.44  | 4 | 198.60  | 22.12  | 5 | 131.98  | 26.12  | 5 |
| 60 | Tyr        | 438.69  | 90.97  | 13 | 1309.20 | 137.17 | 5 | 1144.50 | 160.24 | 4 | 1015.20 | 64.47  | 5 | 723.24  | 141.03 | 5 |
| 61 | Val        | 757.34  | 139.28 | 13 | 2175.60 | 251.54 | 5 | 1618.50 | 188.43 | 4 | 1194.00 | 105.21 | 5 | 912.84  | 169.92 | 5 |
| 62 | ADMA       | 2.88    | 0.18   | 13 | 8.28    | 0.29   | 5 | 7.56    | 1.05   | 4 | 5.43    | 0.40   | 5 | 4.44    | 0.29   | 5 |
| 63 | Kynurenine | 2.99    | 0.39   | 13 | 2.87    | 0.35   | 5 | 2.78    | 0.48   | 4 | 3.46    | 0.61   | 5 | 3.04    | 0.66   | 5 |
| 64 | Met-SO     | 8.52    | 2.22   | 13 | 23.39   | 3.26   | 5 | 9.81    | 1.00   | 4 | 16.27   | 2.98   | 5 | 24.54   | 6.36   | 5 |
| 65 | Putrescine | 26.62   | 1.89   | 13 | 21.34   | 1.07   | 5 | 20.06   | 2.59   | 4 | 20.48   | 1.16   | 5 | 35.77   | 3.93   | 5 |
| 66 | Serotonin  | 9.79    | 1.66   | 13 | 1.65    | 0.64   | 5 | 3.18    | 1.04   | 4 | 1.44    | 0.40   | 5 | 6.49    | 1.07   | 5 |
| 67 | Spermidine | 63.36   | 1.64   | 13 | 83.16   | 2.18   | 5 | 77.66   | 7.34   | 4 | 79.20   | 4.03   | 5 | 83.06   | 7.84   | 5 |
| 68 | Spermine   | 5.98    | 0.36   | 13 | 6.14    | 0.59   | 5 | 6.17    | 0.87   | 4 | 7.43    | 0.51   | 5 | 5.86    | 0.65   | 5 |
| 69 | t4-OH-Pro  | 22.32   | 2.29   | 13 | 15.82   | 2.61   | 5 | 10.28   | 1.34   | 4 | 15.22   | 1.49   | 5 | 10.19   | 1.89   | 5 |
| 70 | total DMA  | 1.36    | 0.24   | 13 | 4.26    | 0.33   | 5 | 3.44    | 0.50   | 4 | 2.56    | 0.25   | 5 | 2.46    | 0.38   | 5 |
| 71 | LPC_14-0   | 9.40    | 0.14   | 13 | 9.85    | 0.32   | 5 | 9.11    | 0.17   | 4 | 9.40    | 0.10   | 5 | 9.60    | 0.11   | 5 |
| 72 | LPC_16-0   | 183.74  | 10.20  | 13 | 297.88  | 15.86  | 5 | 227.72  | 14.72  | 4 | 205.75  | 9.65   | 5 | 230.51  | 20.64  | 5 |
| 73 | LPC_16-1   | 2.00    | 0.17   | 13 | 2.92    | 0.18   | 5 | 2.11    | 0.16   | 4 | 1.76    | 0.14   | 5 | 2.34    | 0.22   | 5 |
| 74 | LPC_17-0   | 3.41    | 0.16   | 13 | 5.54    | 0.37   | 5 | 4.35    | 0.32   | 4 | 4.02    | 0.33   | 5 | 4.49    | 0.16   | 5 |
| 75 | LPC_18-0   | 101.11  | 3.60   | 13 | 158.85  | 10.22  | 5 | 124.69  | 5.61   | 4 | 113.40  | 4.42   | 5 | 121.75  | 5.47   | 5 |
| 76 | LPC_18-1   | 18.32   | 1.10   | 13 | 29.41   | 2.20   | 5 | 20.61   | 0.95   | 4 | 16.55   | 0.69   | 5 | 20.22   | 2.02   | 5 |
| 77 | LPC_18-2   | 56.32   | 3.32   | 13 | 82.78   | 4.82   | 5 | 50.64   | 2.97   | 4 | 51.50   | 1.60   | 5 | 61.43   | 5.73   | 5 |
| 78 | LPC_20-3   | 2.31    | 0.10   | 13 | 2.68    | 0.21   | 5 | 1.98    | 0.08   | 4 | 1.80    | 0.07   | 5 | 1.88    | 0.14   | 5 |
| 79 | LPC_20-4   | 14.73   | 0.59   | 13 | 20.73   | 1.33   | 5 | 13.49   | 0.56   | 4 | 12.46   | 0.82   | 5 | 14.10   | 1.07   | 5 |
| 80 | LPC_24-0   | 1.09    | 0.04   | 13 | 1.50    | 0.11   | 5 | 1.05    | 0.07   | 4 | 1.10    | 0.10   | 5 | 0.91    | 0.06   | 5 |
| 81 | LPC_26-0   | 1.20    | 0.07   | 13 | 1.52    | 0.08   | 5 | 1.00    | 0.02   | 4 | 0.94    | 0.13   | 5 | 0.85    | 0.07   | 5 |
| 82 | LPC_26-1   | 0.62    | 0.03   | 13 | 0.79    | 0.05   | 5 | 0.46    | 0.03   | 4 | 0.40    | 0.06   | 5 | 0.42    | 0.03   | 5 |
| 83 | LPC_28-0   | 1.27    | 0.12   | 13 | 1.32    | 0.06   | 5 | 1.19    | 0.06   | 4 | 1.27    | 0.14   | 5 | 1.11    | 0.11   | 5 |
| 84 | LPC_28-1   | 1.06    | 0.08   | 13 | 1.25    | 0.08   | 5 | 0.84    | 0.09   | 4 | 0.89    | 0.14   | 5 | 0.91    | 0.10   | 5 |
| 85 | PC_24-0    | 0.80    | 0.04   | 13 | 0.84    | 0.11   | 5 | 0.60    | 0.03   | 4 | 0.56    | 0.06   | 5 | 0.54    | 0.03   | 5 |
| 86 | PC_26-0    | 4.97    | 0.19   | 13 | 5.53    | 0.37   | 5 | 4.62    | 0.10   | 4 | 4.58    | 0.28   | 5 | 4.51    | 0.18   | 5 |
| 87 | PC_28-1    | 1.60    | 0.07   | 13 | 1.66    | 0.13   | 5 | 1.34    | 0.03   | 4 | 1.39    | 0.13   | 5 | 1.34    | 0.12   | 5 |
| 88 | PC_30-0    | 30.02   | 1.37   | 13 | 29.79   | 1.03   | 5 | 22.13   | 1.33   | 4 | 22.81   | 0.47   | 5 | 21.57   | 2.03   | 5 |
| 89 | PC_30-2    | 0.47    | 0.05   | 13 | 0.61    | 0.07   | 5 | 0.35    | 0.08   | 4 | 0.34    | 0.15   | 5 | 0.12    | 0.02   | 5 |
| 90 | PC_32-0    | 344.56  | 19.41  | 13 | 384.95  | 19.51  | 5 | 311.30  | 24.76  | 4 | 336.80  | 3.22   | 5 | 300.03  | 32.43  | 5 |
| 91 | PC_32-1    | 54.36   | 3.05   | 13 | 57.23   | 2.97   | 5 | 52.69   | 2.44   | 4 | 50.33   | 2.21   | 5 | 45.87   | 3.13   | 5 |
| 92 | PC_32-2    | 8.23    | 0.33   | 13 | 9.47    | 0.43   | 5 | 6.85    | 0.28   | 4 | 7.07    | 0.31   | 5 | 6.64    | 0.63   | 5 |
| 93 | PC_32-3    | 1.04    | 0.05   | 13 | 1.01    | 0.04   | 5 | 0.86    | 0.02   | 4 | 0.81    | 0.07   | 5 | 0.80    | 0.07   | 5 |
| 94 | PC_34-1    | 581.23  | 34.70  | 13 | 724.64  | 22.85  | 5 | 550.68  | 30.66  | 4 | 582.14  | 16.96  | 5 | 543.37  | 63.50  | 5 |
| 95 | PC_34-2    | 1812.34 | 40.26  | 13 | 1575.01 | 111.42 | 5 | 1883.76 | 97.58  | 4 | 2010.87 | 58.15  | 5 | 1865.38 | 67.78  | 5 |
| 96 | PC_34-3    | 88.38   | 4.23   | 13 | 119.26  | 6.44   | 5 | 84.30   | 4.13   | 4 | 97.57   | 6.52   | 5 | 96.77   | 10.02  | 5 |
| 97 | PC_34-4    | 5.24    | 0.22   | 13 | 5.95    | 0.43   | 5 | 4.28    | 0.08   | 4 | 4.74    | 0.29   | 5 | 4.55    | 0.31   | 5 |
| 98 | PC_36-0    | 8.41    | 0.42   | 13 | 8.42    | 0.74   | 5 | 8.10    | 0.32   | 4 | 9.22    | 0.53   | 5 | 8.96    | 0.89   | 5 |
| 99 | PC_36-1    | 245.86  | 19.87  | 13 | 294.91  | 11.59  | 5 | 241.57  | 19.16  | 4 | 253.44  | 9.29   | 5 | 208.91  | 34.64  | 5 |

|     |           |         |       |    |         |       |   |         |        |   |         |       |   |         |        |   |
|-----|-----------|---------|-------|----|---------|-------|---|---------|--------|---|---------|-------|---|---------|--------|---|
| 100 | PC_36-2   | 1502.79 | 55.78 | 13 | 1556.89 | 73.27 | 5 | 1574.89 | 100.54 | 4 | 1702.90 | 28.92 | 5 | 1470.95 | 111.45 | 5 |
| 101 | PC_36-3   | 628.50  | 29.10 | 13 | 718.56  | 23.98 | 5 | 588.03  | 27.54  | 4 | 624.01  | 22.87 | 5 | 590.94  | 54.14  | 5 |
| 102 | PC_36-4   | 1196.86 | 45.86 | 13 | 1312.24 | 55.94 | 5 | 1134.79 | 61.98  | 4 | 1205.24 | 43.30 | 5 | 1159.40 | 92.79  | 5 |
| 103 | PC_36-5   | 61.18   | 2.39  | 13 | 78.49   | 4.14  | 5 | 58.67   | 1.38   | 4 | 63.11   | 3.30  | 5 | 63.47   | 5.57   | 5 |
| 104 | PC_36-6   | 1.92    | 0.11  | 13 | 2.36    | 0.11  | 5 | 1.65    | 0.08   | 4 | 1.81    | 0.09  | 5 | 1.75    | 0.16   | 5 |
| 105 | PC_38-0   | 8.67    | 0.67  | 13 | 9.96    | 0.47  | 5 | 8.62    | 0.97   | 4 | 9.68    | 0.32  | 5 | 9.68    | 1.33   | 5 |
| 106 | PC_38-1   | 4.29    | 0.31  | 13 | 4.93    | 0.40  | 5 | 4.64    | 0.38   | 4 | 5.62    | 0.30  | 5 | 4.61    | 0.61   | 5 |
| 107 | PC_38-3   | 151.99  | 11.10 | 13 | 155.97  | 9.10  | 5 | 143.99  | 10.24  | 4 | 144.65  | 7.01  | 5 | 121.82  | 14.84  | 5 |
| 108 | PC_38-4   | 741.41  | 45.39 | 13 | 749.77  | 41.42 | 5 | 694.90  | 43.61  | 4 | 725.10  | 28.75 | 5 | 643.20  | 62.17  | 5 |
| 109 | PC_38-5   | 215.70  | 12.17 | 13 | 210.61  | 13.28 | 5 | 185.36  | 9.42   | 4 | 181.39  | 7.22  | 5 | 170.44  | 11.33  | 5 |
| 110 | PC_38-6   | 254.25  | 13.31 | 13 | 281.91  | 12.83 | 5 | 242.46  | 12.63  | 4 | 256.37  | 11.27 | 5 | 234.96  | 19.24  | 5 |
| 111 | PC_40-1   | 2.80    | 0.21  | 13 | 3.40    | 0.24  | 5 | 2.95    | 0.26   | 4 | 2.99    | 0.05  | 5 | 2.98    | 0.44   | 5 |
| 112 | PC_40-2   | 6.17    | 0.61  | 13 | 7.36    | 0.57  | 5 | 6.03    | 0.60   | 4 | 6.60    | 0.22  | 5 | 5.16    | 0.91   | 5 |
| 113 | PC_40-3   | 6.45    | 0.58  | 13 | 7.19    | 0.51  | 5 | 6.36    | 0.59   | 4 | 7.26    | 0.31  | 5 | 5.90    | 0.75   | 5 |
| 114 | PC_40-4   | 32.06   | 2.46  | 13 | 36.81   | 2.71  | 5 | 31.01   | 1.94   | 4 | 34.37   | 1.08  | 5 | 29.13   | 3.84   | 5 |
| 115 | PC_40-5   | 40.22   | 2.81  | 13 | 42.52   | 2.99  | 5 | 37.24   | 2.31   | 4 | 39.89   | 1.29  | 5 | 34.24   | 4.03   | 5 |
| 116 | PC_40-6   | 121.79  | 9.22  | 13 | 129.81  | 6.25  | 5 | 123.19  | 8.88   | 4 | 127.71  | 4.88  | 5 | 109.38  | 12.73  | 5 |
| 117 | PC_42-0   | 1.74    | 0.11  | 13 | 2.12    | 0.14  | 5 | 1.76    | 0.06   | 4 | 1.89    | 0.08  | 5 | 1.86    | 0.22   | 5 |
| 118 | PC_42-1   | 1.18    | 0.11  | 13 | 1.61    | 0.12  | 5 | 1.32    | 0.16   | 4 | 1.36    | 0.06  | 5 | 1.14    | 0.21   | 5 |
| 119 | PC_42-2   | 3.55    | 0.38  | 13 | 4.53    | 0.30  | 5 | 3.31    | 0.39   | 4 | 3.45    | 0.20  | 5 | 2.83    | 0.67   | 5 |
| 120 | PC_42-4   | 4.62    | 0.45  | 13 | 5.42    | 0.35  | 5 | 4.45    | 0.44   | 4 | 4.72    | 0.19  | 5 | 3.96    | 0.70   | 5 |
| 121 | PC_42-5   | 6.36    | 0.51  | 13 | 7.47    | 0.61  | 5 | 6.30    | 0.58   | 4 | 6.70    | 0.28  | 5 | 5.78    | 0.88   | 5 |
| 122 | PC_42-6   | 4.91    | 0.35  | 13 | 5.61    | 0.36  | 5 | 4.61    | 0.41   | 4 | 4.88    | 0.21  | 5 | 4.26    | 0.50   | 5 |
| 123 | PC_O-30-0 | 2.04    | 0.14  | 13 | 1.88    | 0.10  | 5 | 2.00    | 0.25   | 4 | 1.82    | 0.15  | 5 | 1.86    | 0.14   | 5 |
| 124 | PC_O-30-1 | 0.82    | 0.20  | 13 | 1.32    | 0.25  | 5 | 0.36    | 0.13   | 4 | 0.31    | 0.18  | 5 | 0.24    | 0.08   | 5 |
| 125 | PC_O-30-2 | 0.42    | 0.02  | 13 | 0.44    | 0.04  | 5 | 0.34    | 0.02   | 4 | 0.38    | 0.03  | 5 | 0.37    | 0.04   | 5 |
| 126 | PC_O-32-1 | 8.41    | 0.46  | 13 | 9.99    | 0.30  | 5 | 8.11    | 0.52   | 4 | 8.10    | 0.31  | 5 | 7.33    | 0.67   | 5 |
| 127 | PC_O-32-2 | 1.65    | 0.08  | 13 | 1.79    | 0.11  | 5 | 1.72    | 0.14   | 4 | 1.51    | 0.14  | 5 | 1.41    | 0.09   | 5 |
| 128 | PC_O-34-0 | 13.58   | 1.05  | 13 | 17.12   | 1.36  | 5 | 12.82   | 0.86   | 4 | 14.47   | 0.47  | 5 | 12.76   | 1.65   | 5 |
| 129 | PC_O-34-1 | 41.58   | 2.55  | 13 | 46.20   | 2.95  | 5 | 37.75   | 2.91   | 4 | 39.78   | 1.17  | 5 | 35.60   | 3.81   | 5 |
| 130 | PC_O-34-2 | 35.12   | 1.94  | 13 | 44.76   | 2.00  | 5 | 34.50   | 2.64   | 4 | 36.72   | 1.92  | 5 | 35.22   | 3.41   | 5 |
| 131 | PC_O-34-3 | 5.79    | 0.31  | 13 | 6.77    | 0.23  | 5 | 5.15    | 0.33   | 4 | 5.36    | 0.25  | 5 | 4.97    | 0.45   | 5 |
| 132 | PC_O-36-0 | 8.07    | 0.78  | 13 | 11.17   | 0.93  | 5 | 9.38    | 0.70   | 4 | 10.64   | 0.52  | 5 | 9.63    | 1.92   | 5 |
| 133 | PC_O-36-1 | 17.54   | 1.34  | 13 | 22.28   | 0.99  | 5 | 18.48   | 1.43   | 4 | 19.54   | 1.74  | 5 | 18.85   | 3.04   | 5 |
| 134 | PC_O-36-2 | 81.14   | 5.76  | 13 | 104.80  | 4.61  | 5 | 91.85   | 5.82   | 4 | 101.50  | 8.20  | 5 | 87.07   | 11.33  | 5 |
| 135 | PC_O-36-3 | 14.68   | 0.78  | 13 | 18.12   | 0.85  | 5 | 14.11   | 0.81   | 4 | 15.81   | 0.89  | 5 | 15.22   | 1.38   | 5 |
| 136 | PC_O-36-4 | 38.68   | 2.16  | 13 | 47.58   | 2.85  | 5 | 37.94   | 3.18   | 4 | 41.62   | 1.69  | 5 | 39.34   | 3.87   | 5 |
| 137 | PC_O-36-5 | 19.78   | 1.21  | 13 | 24.69   | 1.26  | 5 | 19.22   | 0.96   | 4 | 22.25   | 0.71  | 5 | 19.45   | 2.25   | 5 |
| 138 | PC_O-38-0 | 13.11   | 0.83  | 13 | 16.27   | 1.10  | 5 | 13.28   | 0.79   | 4 | 14.58   | 0.74  | 5 | 13.93   | 1.47   | 5 |
| 139 | PC_O-38-1 | 9.08    | 0.76  | 13 | 12.18   | 0.58  | 5 | 11.20   | 1.01   | 4 | 11.85   | 1.14  | 5 | 10.78   | 2.28   | 5 |
| 140 | PC_O-38-2 | 64.16   | 5.53  | 13 | 97.31   | 6.32  | 5 | 96.08   | 9.76   | 4 | 108.76  | 12.93 | 5 | 92.55   | 18.86  | 5 |
| 141 | PC_O-38-3 | 11.52   | 0.75  | 13 | 14.92   | 0.60  | 5 | 12.97   | 0.62   | 4 | 14.38   | 1.27  | 5 | 12.97   | 1.89   | 5 |
| 142 | PC_O-38-4 | 40.73   | 2.74  | 13 | 50.28   | 2.87  | 5 | 43.53   | 3.04   | 4 | 45.30   | 2.86  | 5 | 41.87   | 4.79   | 5 |
| 143 | PC_O-38-5 | 34.19   | 1.98  | 13 | 39.63   | 2.64  | 5 | 33.56   | 2.87   | 4 | 36.58   | 0.72  | 5 | 35.72   | 3.60   | 5 |
| 144 | PC_O-38-6 | 14.83   | 0.93  | 13 | 17.89   | 0.81  | 5 | 14.68   | 0.96   | 4 | 16.60   | 0.53  | 5 | 15.16   | 1.73   | 5 |
| 145 | PC_O-40-1 | 28.52   | 1.69  | 13 | 29.54   | 1.53  | 5 | 28.38   | 1.56   | 4 | 28.34   | 1.05  | 5 | 26.61   | 2.55   | 5 |
| 146 | PC_O-40-2 | 5.38    | 0.44  | 13 | 6.69    | 0.46  | 5 | 5.71    | 0.49   | 4 | 6.15    | 0.30  | 5 | 5.43    | 0.93   | 5 |
| 147 | PC_O-40-3 | 4.92    | 0.45  | 13 | 5.88    | 0.25  | 5 | 5.86    | 0.55   | 4 | 5.95    | 0.56  | 5 | 5.37    | 0.96   | 5 |
| 148 | PC_O-40-4 | 23.90   | 1.95  | 13 | 32.70   | 2.13  | 5 | 31.08   | 2.07   | 4 | 32.79   | 3.05  | 5 | 28.39   | 4.26   | 5 |
| 149 | PC_O-40-5 | 8.71    | 0.57  | 13 | 10.40   | 0.58  | 5 | 8.99    | 0.63   | 4 | 9.56    | 0.43  | 5 | 8.97    | 1.13   | 5 |
| 150 | PC_O-40-6 | 9.23    | 0.62  | 13 | 11.39   | 0.60  | 5 | 10.45   | 0.81   | 4 | 11.25   | 0.58  | 5 | 10.46   | 1.20   | 5 |



|     |                         |          |         |    |          |         |   |          |         |   |          |         |   |          |         |   |
|-----|-------------------------|----------|---------|----|----------|---------|---|----------|---------|---|----------|---------|---|----------|---------|---|
| 151 | PC_O-42-0               | 5.73     | 0.28    | 13 | 6.12     | 0.38    | 5 | 5.76     | 0.38    | 4 | 6.17     | 0.20    | 5 | 5.71     | 0.46    | 5 |
| 152 | PC_O-42-1               | 6.40     | 0.42    | 13 | 6.56     | 0.48    | 5 | 5.62     | 0.56    | 4 | 5.92     | 0.26    | 5 | 5.55     | 0.61    | 5 |
| 153 | PC_O-42-2               | 4.54     | 0.39    | 13 | 4.71     | 0.32    | 5 | 3.95     | 0.29    | 4 | 4.11     | 0.16    | 5 | 3.47     | 0.52    | 5 |
| 154 | PC_O-42-3               | 7.48     | 0.54    | 13 | 7.00     | 0.56    | 5 | 6.96     | 0.42    | 4 | 6.43     | 0.45    | 5 | 5.84     | 0.45    | 5 |
| 155 | PC_O-42-4               | 5.88     | 0.61    | 13 | 8.38     | 0.69    | 5 | 6.97     | 0.78    | 4 | 7.35     | 0.20    | 5 | 6.11     | 1.26    | 5 |
| 156 | PC_O-42-5               | 7.34     | 0.49    | 13 | 9.41     | 0.63    | 5 | 8.11     | 0.51    | 4 | 8.25     | 0.23    | 5 | 8.03     | 1.08    | 5 |
| 157 | PC_O-44-3               | 1.23     | 0.05    | 13 | 1.45     | 0.09    | 5 | 1.27     | 0.05    | 4 | 1.25     | 0.06    | 5 | 1.09     | 0.10    | 5 |
| 158 | PC_O-44-4               | 2.27     | 0.24    | 13 | 3.16     | 0.21    | 5 | 2.51     | 0.30    | 4 | 2.63     | 0.12    | 5 | 2.10     | 0.47    | 5 |
| 159 | PC_O-44-5               | 4.01     | 0.36    | 13 | 5.05     | 0.31    | 5 | 4.23     | 0.40    | 4 | 4.13     | 0.22    | 5 | 3.76     | 0.59    | 5 |
| 160 | PC_O-44-6               | 3.12     | 0.29    | 13 | 4.10     | 0.29    | 5 | 3.29     | 0.23    | 4 | 3.27     | 0.10    | 5 | 3.11     | 0.60    | 5 |
| 161 | SM_32-2 OH              | 21.30    | 1.29    | 13 | 23.99    | 1.22    | 5 | 21.37    | 0.69    | 4 | 23.87    | 1.50    | 5 | 22.25    | 1.99    | 5 |
| 162 | SM_34-2 OH              | 9.37     | 0.53    | 13 | 10.02    | 0.58    | 5 | 8.49     | 0.19    | 4 | 8.88     | 0.34    | 5 | 8.56     | 0.66    | 5 |
| 163 | SM_40-2 OH              | 12.77    | 1.42    | 13 | 14.69    | 1.53    | 5 | 11.38    | 1.45    | 4 | 11.05    | 0.70    | 5 | 9.44     | 2.37    | 5 |
| 164 | SM_40-3 OH              | 4.14     | 0.36    | 13 | 4.50     | 0.39    | 5 | 4.41     | 0.19    | 4 | 4.59     | 0.22    | 5 | 4.21     | 0.57    | 5 |
| 165 | SM_42-2 OH              | 1.79     | 0.18    | 13 | 2.14     | 0.18    | 5 | 1.76     | 0.21    | 4 | 1.69     | 0.13    | 5 | 1.59     | 0.26    | 5 |
| 166 | SM_34-1                 | 593.25   | 21.53   | 13 | 624.91   | 18.62   | 5 | 564.36   | 15.85   | 4 | 586.32   | 20.85   | 5 | 559.33   | 43.87   | 5 |
| 167 | SM_34-2                 | 7.61     | 0.28    | 13 | 7.76     | 0.18    | 5 | 6.69     | 0.22    | 4 | 7.44     | 0.16    | 5 | 7.39     | 0.51    | 5 |
| 168 | SM_36-1                 | 73.38    | 4.17    | 13 | 79.09    | 3.85    | 5 | 64.21    | 4.21    | 4 | 70.37    | 1.59    | 5 | 60.55    | 6.15    | 5 |
| 169 | SM_36-2                 | 5.08     | 0.26    | 13 | 5.07     | 0.30    | 5 | 4.45     | 0.25    | 4 | 5.10     | 0.18    | 5 | 4.66     | 0.34    | 5 |
| 170 | SM_38-3                 | 0.36     | 0.03    | 13 | 0.37     | 0.04    | 5 | 0.39     | 0.09    | 4 | 0.36     | 0.08    | 5 | 0.42     | 0.06    | 5 |
| 171 | SM_42-1                 | 40.50    | 4.10    | 13 | 49.63    | 3.95    | 5 | 41.57    | 4.40    | 4 | 44.60    | 1.92    | 5 | 36.68    | 8.06    | 5 |
| 172 | SM_42-2                 | 65.48    | 5.13    | 13 | 70.94    | 4.59    | 5 | 63.65    | 5.28    | 4 | 72.16    | 3.38    | 5 | 60.30    | 8.83    | 5 |
| 173 | H1                      | 2200.98  | 284.14  | 13 | 5550.05  | 814.34  | 5 | 2419.50  | 137.12  | 4 | 3938.38  | 487.53  | 5 | 2688.39  | 556.16  | 5 |
| 174 | C2,C3 / CO              | 0.22     | 0.02    | 13 | 0.12     | 0.04    | 5 | 0.04     | 0.01    | 4 | 0.15     | 0.05    | 5 | 0.38     | 0.10    | 5 |
| 175 | AAA                     | 1049.10  | 218.81  | 13 | 3173.76  | 338.51  | 5 | 2753.55  | 359.22  | 4 | 2337.00  | 169.82  | 5 | 1757.62  | 342.08  | 5 |
| 176 | ADMA / Arg              | 0.02     | 0.00    | 13 | 0.00     | 0.00    | 5 | 0.01     | 0.00    | 4 | 0.00     | 0.00    | 5 | 0.01     | 0.01    | 5 |
| 177 | BCAA                    | 2374.71  | 481.34  | 13 | 7128.00  | 900.65  | 5 | 5503.50  | 664.73  | 4 | 4432.80  | 466.55  | 5 | 3747.00  | 747.73  | 5 |
| 178 | C2 / CO                 | 0.22     | 0.02    | 13 | 0.11     | 0.04    | 5 | 0.04     | 0.01    | 4 | 0.14     | 0.05    | 5 | 0.37     | 0.09    | 5 |
| 179 | Cit / Arg               | 1.13     | 0.30    | 13 | 0.12     | 0.02    | 5 | 0.10     | 0.01    | 4 | 0.12     | 0.02    | 5 | 0.24     | 0.13    | 5 |
| 180 | Cit / Orn               | 10.54    | 3.18    | 13 | 1.53     | 0.24    | 5 | 1.89     | 0.19    | 4 | 2.31     | 0.17    | 5 | 2.93     | 0.51    | 5 |
| 181 | CPT-I ratio             | 0.02     | 0.00    | 13 | 0.01     | 0.00    | 5 | 0.00     | 0.00    | 4 | 0.01     | 0.00    | 5 | 0.02     | 0.00    | 5 |
| 182 | Essential AA            | 4655.84  | 893.72  | 13 | 14050.56 | 1686.02 | 5 | 10898.70 | 1243.25 | 4 | 9169.08  | 676.53  | 5 | 7196.26  | 1356.06 | 5 |
| 183 | Fisher ratio            | 2.32     | 0.04    | 13 | 2.23     | 0.06    | 5 | 2.01     | 0.05    | 4 | 1.89     | 0.10    | 5 | 2.14     | 0.06    | 5 |
| 184 | Glucogenic AA           | 8517.74  | 1040.16 | 13 | 18655.20 | 1098.57 | 5 | 13324.50 | 1229.79 | 4 | 12109.20 | 806.20  | 5 | 10500.00 | 1057.82 | 5 |
| 185 | Kynurenine / Trp        | 0.10     | 0.03    | 13 | 0.01     | 0.00    | 5 | 0.01     | 0.00    | 4 | 0.02     | 0.00    | 5 | 0.04     | 0.02    | 5 |
| 186 | Met-SO / Met            | 0.02     | 0.00    | 13 | 0.02     | 0.00    | 5 | 0.01     | 0.00    | 4 | 0.02     | 0.00    | 5 | 0.05     | 0.01    | 5 |
| 187 | MUFA_PC                 | 999.37   | 63.71   | 13 | 1211.51  | 43.11   | 5 | 960.44   | 57.61   | 4 | 1005.49  | 28.93   | 5 | 908.57   | 112.67  | 5 |
| 188 | MUFA_PC / SFA_PC        | 2.25     | 0.05    | 13 | 2.46     | 0.03    | 5 | 2.41     | 0.04    | 4 | 2.32     | 0.04    | 5 | 2.31     | 0.04    | 5 |
| 189 | Non essential AA        | 16812.83 | 1825.89 | 13 | 34023.96 | 2199.05 | 5 | 25764.44 | 2168.35 | 4 | 23939.95 | 1501.55 | 5 | 22554.58 | 2561.76 | 5 |
| 190 | Orn / Arg               | 0.11     | 0.02    | 13 | 0.08     | 0.01    | 5 | 0.05     | 0.01    | 4 | 0.05     | 0.01    | 5 | 0.07     | 0.03    | 5 |
| 191 | PUFA_PC                 | 7346.66  | 266.60  | 13 | 7603.55  | 367.58  | 5 | 7332.26  | 400.39  | 4 | 7811.11  | 158.57  | 5 | 7125.16  | 496.89  | 5 |
| 192 | PUFA_PC / MUFA_PC       | 7.55     | 0.28    | 13 | 6.27     | 0.14    | 5 | 7.65     | 0.16    | 4 | 7.78     | 0.12    | 5 | 8.01     | 0.35    | 5 |
| 193 | PUFA_PC / SFA_PC        | 16.91    | 0.47    | 13 | 15.41    | 0.34    | 5 | 18.40    | 0.52    | 4 | 18.03    | 0.16    | 5 | 18.48    | 0.65    | 5 |
| 194 | Putrescine / Orn        | 1.52     | 0.40    | 13 | 0.19     | 0.03    | 5 | 0.32     | 0.02    | 4 | 0.39     | 0.07    | 5 | 0.88     | 0.11    | 5 |
| 195 | Serotonin / Trp         | 0.27     | 0.09    | 13 | 0.00     | 0.00    | 5 | 0.02     | 0.00    | 4 | 0.01     | 0.00    | 5 | 0.07     | 0.03    | 5 |
| 196 | SFA_PC                  | 441.69   | 24.47   | 13 | 494.17   | 24.80   | 5 | 400.35   | 29.47   | 4 | 433.22   | 6.13    | 5 | 391.03   | 42.31   | 5 |
| 197 | Spermidine / Putrescine | 2.49     | 0.14    | 13 | 3.94     | 0.24    | 5 | 3.95     | 0.29    | 4 | 3.92     | 0.30    | 5 | 2.37     | 0.20    | 5 |
| 198 | Spermine / Spermidine   | 0.10     | 0.01    | 13 | 0.07     | 0.01    | 5 | 0.08     | 0.01    | 4 | 0.09     | 0.01    | 5 | 0.07     | 0.00    | 5 |
| 199 | Total_PC,SM             | 9623.05  | 389.04  | 13 | 10202.70 | 458.28  | 5 | 9486.12  | 513.44  | 4 | 10086.40 | 207.16  | 5 | 9200.51  | 717.97  | 5 |
| 200 | Total AA                | 21468.66 | 2685.70 | 13 | 48074.52 | 3858.62 | 5 | 36663.14 | 3391.69 | 4 | 33109.03 | 2172.09 | 5 | 29750.83 | 3898.88 | 5 |
| 201 | Total AC / CO           | 0.31     | 0.02    | 13 | 0.21     | 0.05    | 5 | 0.11     | 0.01    | 4 | 0.21     | 0.06    | 5 | 0.47     | 0.11    | 5 |

|     |                               |         |        |    |         |        |   |         |        |   |         |        |   |         |        |   |
|-----|-------------------------------|---------|--------|----|---------|--------|---|---------|--------|---|---------|--------|---|---------|--------|---|
| 202 | Total AC-DC / Total AC        | 0.04    | 0.00   | 13 | 0.11    | 0.03   | 5 | 0.13    | 0.00   | 4 | 0.07    | 0.02   | 5 | 0.03    | 0.00   | 5 |
| 203 | Total AC-OH / Total AC        | 0.04    | 0.00   | 13 | 0.05    | 0.00   | 5 | 0.06    | 0.00   | 4 | 0.04    | 0.01   | 5 | 0.03    | 0.01   | 5 |
| 204 | Total LPC                     | 396.59  | 16.45  | 13 | 617.01  | 33.53  | 5 | 459.23  | 23.63  | 4 | 421.25  | 16.65  | 5 | 470.51  | 34.38  | 5 |
| 205 | Total LPC / Total PC          | 0.05    | 0.00   | 13 | 0.07    | 0.01   | 5 | 0.06    | 0.00   | 4 | 0.04    | 0.00   | 5 | 0.06    | 0.01   | 5 |
| 206 | Total PC                      | 8787.72 | 352.32 | 13 | 9309.23 | 429.69 | 5 | 8693.04 | 484.03 | 4 | 9249.83 | 188.77 | 5 | 8424.76 | 648.67 | 5 |
| 207 | Total PC_diacyl               | 8182.16 | 313.26 | 13 | 8549.28 | 397.90 | 5 | 8034.93 | 448.24 | 4 | 8538.42 | 153.69 | 5 | 7782.47 | 571.27 | 5 |
| 208 | Total PC_ether                | 605.56  | 39.48  | 13 | 759.95  | 35.79  | 5 | 658.11  | 42.48  | 4 | 711.42  | 42.98  | 5 | 642.29  | 82.55  | 5 |
| 209 | Total SM                      | 835.33  | 37.71  | 13 | 893.47  | 31.29  | 5 | 793.08  | 31.10  | 4 | 836.57  | 27.28  | 5 | 775.75  | 72.49  | 5 |
| 210 | Total SM / Total_SM,PC        | 0.09    | 0.00   | 13 | 0.09    | 0.00   | 5 | 0.08    | 0.00   | 4 | 0.08    | 0.00   | 5 | 0.08    | 0.00   | 5 |
| 211 | Total SM / Total PC           | 0.10    | 0.00   | 13 | 0.10    | 0.00   | 5 | 0.09    | 0.00   | 4 | 0.09    | 0.00   | 5 | 0.09    | 0.00   | 5 |
| 212 | Total SM-non OH               | 785.96  | 34.48  | 13 | 838.15  | 28.90  | 5 | 745.67  | 28.61  | 4 | 786.49  | 25.83  | 5 | 729.69  | 66.82  | 5 |
| 213 | Total SM-OH                   | 49.37   | 3.49   | 13 | 55.33   | 3.44   | 5 | 47.41   | 2.49   | 4 | 50.07   | 2.45   | 5 | 46.05   | 5.79   | 5 |
| 214 | Total SM-OH / Total SM-non OH | 0.06    | 0.00   | 13 | 0.07    | 0.00   | 5 | 0.06    | 0.00   | 4 | 0.06    | 0.00   | 5 | 0.06    | 0.00   | 5 |
| 215 | Tyr / Phe                     | 0.85    | 0.02   | 13 | 0.82    | 0.02   | 5 | 0.83    | 0.02   | 4 | 0.91    | 0.04   | 5 | 0.82    | 0.04   | 5 |

**Table S2.** Day 1 jejunum metabolite concentrations. Values reported in pmol mg<sup>-1</sup> of tissue.

|    |               | Sham    |        |    | 8 Gy    |        |   | 10 Gy   |        |   | 12 Gy   |        |   | 14 Gy   |        |   |
|----|---------------|---------|--------|----|---------|--------|---|---------|--------|---|---------|--------|---|---------|--------|---|
|    |               | Mean    | SEM    | N  | Mean    | SEM    | N | Mean    | SEM    | N | Mean    | SEM    | N | Mean    | SEM    | N |
| 1  | C0            | 249.68  | 10.83  | 13 | 279.38  | 17.35  | 5 | 277.57  | 22.18  | 5 | 269.71  | 10.68  | 5 | 259.14  | 14.68  | 5 |
| 2  | C10           | 0.71    | 0.05   | 13 | 1.15    | 0.20   | 5 | 0.85    | 0.17   | 5 | 0.68    | 0.04   | 5 | 0.61    | 0.03   | 5 |
| 3  | C10-1         | 0.70    | 0.03   | 13 | 0.94    | 0.11   | 5 | 0.73    | 0.05   | 5 | 0.71    | 0.03   | 5 | 0.66    | 0.02   | 5 |
| 4  | C10-2         | 0.46    | 0.02   | 13 | 0.60    | 0.06   | 5 | 0.44    | 0.03   | 5 | 0.42    | 0.04   | 5 | 0.40    | 0.01   | 5 |
| 5  | C12           | 0.69    | 0.06   | 13 | 1.29    | 0.24   | 5 | 0.86    | 0.09   | 5 | 0.71    | 0.07   | 5 | 0.64    | 0.03   | 5 |
| 6  | C12-DC        | 1.49    | 0.04   | 13 | 1.98    | 0.24   | 5 | 1.45    | 0.07   | 5 | 1.34    | 0.03   | 5 | 1.38    | 0.04   | 5 |
| 7  | C12-1         | 0.64    | 0.02   | 13 | 0.89    | 0.11   | 5 | 0.71    | 0.04   | 5 | 0.68    | 0.02   | 5 | 0.66    | 0.02   | 5 |
| 8  | C14           | 1.01    | 0.07   | 13 | 1.39    | 0.18   | 5 | 0.97    | 0.08   | 5 | 1.24    | 0.05   | 5 | 1.15    | 0.09   | 5 |
| 9  | C14-1         | 0.26    | 0.02   | 13 | 0.44    | 0.08   | 5 | 0.27    | 0.03   | 5 | 0.30    | 0.02   | 5 | 0.31    | 0.03   | 5 |
| 10 | C14-1 OH      | 0.32    | 0.03   | 13 | 0.53    | 0.09   | 5 | 0.35    | 0.03   | 5 | 0.36    | 0.04   | 5 | 0.33    | 0.02   | 5 |
| 11 | C14-2         | 0.17    | 0.01   | 13 | 0.29    | 0.06   | 5 | 0.17    | 0.02   | 5 | 0.24    | 0.04   | 5 | 0.18    | 0.01   | 5 |
| 12 | C14-2 OH      | 0.21    | 0.02   | 13 | 0.40    | 0.07   | 5 | 0.26    | 0.03   | 5 | 0.24    | 0.03   | 5 | 0.20    | 0.01   | 5 |
| 13 | C16           | 2.25    | 0.18   | 13 | 2.40    | 0.20   | 5 | 2.21    | 0.18   | 5 | 2.83    | 0.12   | 5 | 2.70    | 0.34   | 5 |
| 14 | C16-OH        | 0.60    | 0.05   | 13 | 0.83    | 0.15   | 5 | 0.59    | 0.05   | 5 | 0.59    | 0.06   | 5 | 0.46    | 0.03   | 5 |
| 15 | C16-1         | 0.45    | 0.02   | 13 | 0.59    | 0.07   | 5 | 0.45    | 0.03   | 5 | 0.53    | 0.02   | 5 | 0.53    | 0.03   | 5 |
| 16 | C16-1 OH      | 0.35    | 0.03   | 13 | 0.61    | 0.11   | 5 | 0.40    | 0.03   | 5 | 0.37    | 0.03   | 5 | 0.32    | 0.03   | 5 |
| 17 | C16-2         | 0.23    | 0.02   | 13 | 0.42    | 0.11   | 5 | 0.23    | 0.02   | 5 | 0.24    | 0.02   | 5 | 0.25    | 0.02   | 5 |
| 18 | C16-2 OH      | 0.25    | 0.02   | 13 | 0.39    | 0.06   | 5 | 0.28    | 0.03   | 5 | 0.22    | 0.02   | 5 | 0.22    | 0.01   | 5 |
| 19 | C18           | 1.42    | 0.10   | 13 | 1.49    | 0.12   | 5 | 1.31    | 0.10   | 5 | 1.51    | 0.08   | 5 | 1.43    | 0.17   | 5 |
| 20 | C18-1         | 1.01    | 0.10   | 13 | 1.07    | 0.07   | 5 | 1.00    | 0.13   | 5 | 1.46    | 0.14   | 5 | 1.62    | 0.24   | 5 |
| 21 | C18-1 OH      | 0.53    | 0.03   | 13 | 0.62    | 0.07   | 5 | 0.50    | 0.06   | 5 | 0.52    | 0.02   | 5 | 0.47    | 0.03   | 5 |
| 22 | C18-2         | 0.70    | 0.07   | 13 | 0.65    | 0.07   | 5 | 0.50    | 0.06   | 5 | 0.73    | 0.05   | 5 | 0.85    | 0.09   | 5 |
| 23 | C2            | 52.64   | 4.03   | 13 | 55.22   | 4.71   | 5 | 42.49   | 4.57   | 5 | 43.85   | 3.60   | 5 | 48.93   | 5.00   | 5 |
| 24 | C3            | 1.68    | 0.12   | 13 | 2.11    | 0.20   | 5 | 1.41    | 0.13   | 5 | 1.42    | 0.10   | 5 | 1.64    | 0.13   | 5 |
| 25 | C3-DC_C4-OH   | 2.07    | 0.13   | 13 | 2.61    | 0.23   | 5 | 3.04    | 0.20   | 5 | 4.03    | 0.22   | 5 | 3.48    | 0.70   | 5 |
| 26 | C3-OH         | 0.44    | 0.03   | 13 | 0.69    | 0.10   | 5 | 0.46    | 0.03   | 5 | 0.39    | 0.02   | 5 | 0.40    | 0.01   | 5 |
| 27 | C3-1          | 0.34    | 0.04   | 13 | 0.65    | 0.11   | 5 | 0.40    | 0.04   | 5 | 0.30    | 0.02   | 5 | 0.31    | 0.02   | 5 |
| 28 | C4            | 1.19    | 0.10   | 13 | 1.80    | 0.14   | 5 | 1.06    | 0.10   | 5 | 0.96    | 0.07   | 5 | 0.97    | 0.09   | 5 |
| 29 | C4-1          | 0.29    | 0.02   | 13 | 0.50    | 0.07   | 5 | 0.34    | 0.03   | 5 | 0.30    | 0.02   | 5 | 0.30    | 0.02   | 5 |
| 30 | C5            | 1.06    | 0.05   | 13 | 1.63    | 0.10   | 5 | 1.09    | 0.05   | 5 | 1.00    | 0.04   | 5 | 0.99    | 0.06   | 5 |
| 31 | C5-DC_C6-OH   | 0.75    | 0.09   | 13 | 1.58    | 0.28   | 5 | 0.94    | 0.10   | 5 | 0.65    | 0.06   | 5 | 0.67    | 0.06   | 5 |
| 32 | C5-M-DC       | 0.48    | 0.04   | 13 | 0.75    | 0.12   | 5 | 0.47    | 0.04   | 5 | 0.41    | 0.03   | 5 | 0.38    | 0.03   | 5 |
| 33 | C5-OH_C3-DC-M | 1.33    | 0.19   | 13 | 1.44    | 0.24   | 5 | 0.86    | 0.06   | 5 | 0.84    | 0.09   | 5 | 0.70    | 0.03   | 5 |
| 34 | C5-1          | 0.32    | 0.02   | 13 | 0.49    | 0.07   | 5 | 0.32    | 0.03   | 5 | 0.35    | 0.03   | 5 | 0.31    | 0.01   | 5 |
| 35 | C5-1 DC       | 0.91    | 0.14   | 13 | 2.17    | 0.44   | 5 | 1.06    | 0.13   | 5 | 0.53    | 0.09   | 5 | 0.47    | 0.05   | 5 |
| 36 | C6_C4-1 DC    | 0.49    | 0.05   | 13 | 0.94    | 0.17   | 5 | 0.62    | 0.09   | 5 | 0.44    | 0.04   | 5 | 0.44    | 0.03   | 5 |
| 37 | C6-1          | 0.35    | 0.04   | 13 | 0.68    | 0.12   | 5 | 0.41    | 0.04   | 5 | 0.28    | 0.02   | 5 | 0.26    | 0.02   | 5 |
| 38 | C7-DC         | 0.31    | 0.03   | 13 | 0.64    | 0.11   | 5 | 0.46    | 0.07   | 5 | 0.62    | 0.12   | 5 | 0.49    | 0.06   | 5 |
| 39 | C8            | 0.76    | 0.04   | 13 | 0.99    | 0.12   | 5 | 1.15    | 0.38   | 5 | 0.82    | 0.04   | 5 | 0.73    | 0.05   | 5 |
| 40 | C9            | 0.34    | 0.03   | 13 | 0.68    | 0.13   | 5 | 0.37    | 0.03   | 5 | 0.32    | 0.03   | 5 | 0.27    | 0.01   | 5 |
| 41 | Ala           | 4546.15 | 602.59 | 13 | 6679.20 | 947.08 | 5 | 5833.20 | 337.38 | 5 | 5910.00 | 318.15 | 5 | 7476.00 | 527.39 | 5 |
| 42 | Arg           | 486.32  | 119.35 | 13 | 1278.48 | 247.48 | 5 | 1065.84 | 157.62 | 5 | 1142.40 | 143.03 | 5 | 1567.20 | 245.25 | 5 |
| 43 | Asn           | 419.82  | 84.21  | 13 | 875.88  | 167.28 | 5 | 713.52  | 85.56  | 5 | 752.40  | 46.73  | 5 | 797.40  | 85.07  | 5 |
| 44 | Asp           | 1390.62 | 120.84 | 13 | 1869.60 | 216.00 | 5 | 1754.40 | 135.47 | 5 | 1681.20 | 162.20 | 5 | 1988.40 | 274.98 | 5 |
| 45 | Cit           | 165.18  | 9.75   | 13 | 71.03   | 6.61   | 5 | 45.86   | 5.14   | 5 | 35.06   | 6.12   | 5 | 55.49   | 13.64  | 5 |
| 46 | Gln           | 826.48  | 133.87 | 13 | 1987.20 | 251.72 | 5 | 2048.40 | 181.10 | 5 | 2094.00 | 197.82 | 5 | 2418.00 | 276.46 | 5 |
| 47 | Glu           | 3498.92 | 169.01 | 13 | 5184.00 | 388.04 | 5 | 4564.80 | 302.41 | 5 | 4833.60 | 275.99 | 5 | 5460.00 | 453.06 | 5 |
| 48 | Gly           | 2814.92 | 247.64 | 13 | 4885.20 | 357.77 | 5 | 3764.40 | 322.15 | 5 | 2602.80 | 275.68 | 5 | 3721.20 | 489.94 | 5 |
| 49 | His           | 224.12  | 41.24  | 13 | 428.64  | 73.87  | 5 | 262.56  | 30.58  | 5 | 339.12  | 16.26  | 5 | 512.52  | 190.84 | 5 |

|     |            |         |        |    |         |        |   |         |        |   |         |        |   |         |        |   |
|-----|------------|---------|--------|----|---------|--------|---|---------|--------|---|---------|--------|---|---------|--------|---|
| 50  | Ile        | 558.83  | 117.46 | 13 | 1004.52 | 166.17 | 5 | 870.00  | 156.90 | 5 | 954.00  | 98.81  | 5 | 1128.72 | 153.38 | 5 |
| 51  | Leu        | 1058.54 | 229.30 | 13 | 2126.40 | 463.25 | 5 | 1773.60 | 292.43 | 5 | 1742.40 | 181.55 | 5 | 2102.40 | 281.41 | 5 |
| 52  | Lys        | 574.85  | 113.52 | 13 | 1191.60 | 209.11 | 5 | 1046.04 | 190.05 | 5 | 944.40  | 136.68 | 5 | 1539.60 | 248.52 | 5 |
| 53  | Met        | 344.03  | 67.12  | 13 | 791.88  | 131.78 | 5 | 628.92  | 85.02  | 5 | 621.48  | 51.76  | 5 | 744.00  | 113.38 | 5 |
| 54  | Orn        | 36.69   | 8.18   | 13 | 57.83   | 11.37  | 5 | 41.57   | 8.56   | 5 | 32.84   | 5.76   | 5 | 46.81   | 8.81   | 5 |
| 55  | Phe        | 518.77  | 108.85 | 13 | 1154.40 | 210.86 | 5 | 1022.52 | 147.14 | 5 | 934.80  | 46.37  | 5 | 1299.60 | 193.38 | 5 |
| 56  | Pro        | 808.25  | 144.52 | 13 | 1317.60 | 176.99 | 5 | 1132.80 | 144.06 | 5 | 961.20  | 60.34  | 5 | 1204.80 | 103.67 | 5 |
| 57  | Ser        | 1156.66 | 221.72 | 13 | 2439.60 | 365.87 | 5 | 2442.00 | 342.78 | 5 | 2386.80 | 188.36 | 5 | 2184.00 | 191.13 | 5 |
| 58  | Thr        | 751.85  | 116.56 | 13 | 1711.20 | 303.59 | 5 | 1424.40 | 195.17 | 5 | 1224.00 | 57.02  | 5 | 1506.00 | 109.47 | 5 |
| 59  | Trp        | 91.64   | 20.20  | 13 | 202.92  | 37.07  | 5 | 164.04  | 31.03  | 5 | 178.44  | 11.57  | 5 | 209.16  | 30.98  | 5 |
| 60  | Tyr        | 438.69  | 90.97  | 13 | 1011.12 | 196.11 | 5 | 840.96  | 140.71 | 5 | 847.20  | 73.03  | 5 | 1015.80 | 137.59 | 5 |
| 61  | Val        | 757.34  | 139.28 | 13 | 1477.20 | 236.72 | 5 | 1084.80 | 154.25 | 5 | 870.00  | 57.83  | 5 | 1186.80 | 136.63 | 5 |
| 62  | ADMA       | 2.88    | 0.18   | 13 | 6.09    | 0.41   | 5 | 5.87    | 0.21   | 5 | 4.13    | 0.36   | 5 | 4.17    | 0.60   | 5 |
| 63  | Kynurenine | 2.99    | 0.39   | 13 | 3.49    | 0.23   | 5 | 4.27    | 0.43   | 5 | 6.37    | 0.14   | 5 | 6.58    | 0.78   | 5 |
| 64  | Met-SO     | 8.52    | 2.22   | 13 | 19.39   | 5.85   | 5 | 7.35    | 1.37   | 5 | 6.86    | 1.20   | 5 | 7.63    | 1.97   | 5 |
| 65  | Putrescine | 26.62   | 1.89   | 13 | 59.88   | 4.52   | 5 | 37.46   | 3.12   | 5 | 44.72   | 2.40   | 5 | 46.66   | 2.88   | 5 |
| 66  | Serotonin  | 9.79    | 1.66   | 13 | 3.60    | 0.95   | 5 | 2.81    | 0.57   | 5 | 2.27    | 0.31   | 5 | 7.35    | 2.76   | 5 |
| 67  | Spermidine | 63.36   | 1.64   | 13 | 82.08   | 3.33   | 5 | 83.64   | 3.10   | 5 | 84.36   | 5.23   | 5 | 105.12  | 5.99   | 5 |
| 68  | Spermine   | 5.98    | 0.36   | 13 | 4.78    | 0.17   | 5 | 6.08    | 0.29   | 5 | 6.57    | 0.72   | 5 | 10.61   | 0.84   | 5 |
| 69  | t4-OH-Pro  | 22.32   | 2.29   | 13 | 34.02   | 4.03   | 5 | 28.82   | 2.84   | 5 | 14.87   | 1.79   | 5 | 25.20   | 2.31   | 5 |
| 70  | total DMA  | 1.36    | 0.24   | 13 | 3.28    | 0.37   | 5 | 2.60    | 0.26   | 5 | 1.34    | 0.22   | 5 | 1.94    | 0.40   | 5 |
| 71  | LPC_14-0   | 9.40    | 0.14   | 13 | 9.85    | 0.30   | 5 | 9.63    | 0.43   | 5 | 10.40   | 0.27   | 5 | 9.24    | 0.12   | 5 |
| 72  | LPC_16-0   | 183.74  | 10.20  | 13 | 188.74  | 10.13  | 5 | 190.52  | 8.39   | 5 | 206.77  | 9.03   | 5 | 217.74  | 16.80  | 5 |
| 73  | LPC_16-1   | 2.00    | 0.17   | 13 | 2.25    | 0.08   | 5 | 2.00    | 0.27   | 5 | 2.25    | 0.15   | 5 | 2.21    | 0.24   | 5 |
| 74  | LPC_17-0   | 3.41    | 0.16   | 13 | 4.42    | 0.27   | 5 | 4.77    | 0.38   | 5 | 5.26    | 0.24   | 5 | 5.14    | 0.35   | 5 |
| 75  | LPC_18-0   | 101.11  | 3.60   | 13 | 126.24  | 8.61   | 5 | 129.66  | 6.14   | 5 | 148.09  | 5.39   | 5 | 158.68  | 8.05   | 5 |
| 76  | LPC_18-1   | 18.32   | 1.10   | 13 | 18.69   | 0.56   | 5 | 16.91   | 1.07   | 5 | 17.07   | 0.51   | 5 | 18.90   | 0.76   | 5 |
| 77  | LPC_18-2   | 56.32   | 3.32   | 13 | 42.32   | 3.06   | 5 | 41.73   | 2.09   | 5 | 42.82   | 1.80   | 5 | 50.00   | 2.35   | 5 |
| 78  | LPC_20-3   | 2.31    | 0.10   | 13 | 2.57    | 0.33   | 5 | 1.82    | 0.09   | 5 | 1.80    | 0.06   | 5 | 1.78    | 0.08   | 5 |
| 79  | LPC_20-4   | 14.73   | 0.59   | 13 | 15.89   | 0.66   | 5 | 13.84   | 0.33   | 5 | 13.57   | 0.67   | 5 | 16.36   | 1.25   | 5 |
| 80  | LPC_24-0   | 1.09    | 0.04   | 13 | 1.56    | 0.23   | 5 | 1.25    | 0.13   | 5 | 1.74    | 0.16   | 5 | 1.26    | 0.08   | 5 |
| 81  | LPC_26-0   | 1.20    | 0.07   | 13 | 1.38    | 0.28   | 5 | 1.04    | 0.17   | 5 | 1.56    | 0.30   | 5 | 0.81    | 0.08   | 5 |
| 82  | LPC_26-1   | 0.62    | 0.03   | 13 | 0.88    | 0.21   | 5 | 0.46    | 0.07   | 5 | 0.75    | 0.12   | 5 | 0.45    | 0.04   | 5 |
| 83  | LPC_28-0   | 1.27    | 0.12   | 13 | 1.60    | 0.57   | 5 | 1.14    | 0.25   | 5 | 2.49    | 0.67   | 5 | 1.04    | 0.09   | 5 |
| 84  | LPC_28-1   | 1.06    | 0.08   | 13 | 1.45    | 0.43   | 5 | 0.97    | 0.21   | 5 | 1.69    | 0.30   | 5 | 0.97    | 0.17   | 5 |
| 85  | PC_24-0    | 0.80    | 0.04   | 13 | 0.84    | 0.11   | 5 | 0.67    | 0.08   | 5 | 1.00    | 0.18   | 5 | 0.58    | 0.02   | 5 |
| 86  | PC_26-0    | 4.97    | 0.19   | 13 | 5.13    | 0.60   | 5 | 4.33    | 0.33   | 5 | 7.36    | 1.96   | 5 | 4.39    | 0.30   | 5 |
| 87  | PC_28-1    | 1.60    | 0.07   | 13 | 1.61    | 0.26   | 5 | 1.19    | 0.13   | 5 | 1.77    | 0.29   | 5 | 1.49    | 0.27   | 5 |
| 88  | PC_30-0    | 30.02   | 1.37   | 13 | 30.45   | 0.62   | 5 | 26.73   | 1.65   | 5 | 25.03   | 1.32   | 5 | 24.27   | 1.58   | 5 |
| 89  | PC_30-2    | 0.47    | 0.05   | 13 | 0.54    | 0.09   | 5 | 0.29    | 0.05   | 5 | 0.35    | 0.05   | 5 | 0.42    | 0.22   | 5 |
| 90  | PC_32-0    | 344.56  | 19.41  | 13 | 440.45  | 22.49  | 5 | 467.25  | 28.79  | 5 | 484.02  | 32.25  | 5 | 496.88  | 19.25  | 5 |
| 91  | PC_32-1    | 54.36   | 3.05   | 13 | 95.13   | 6.80   | 5 | 83.01   | 6.41   | 5 | 85.96   | 2.53   | 5 | 86.88   | 4.88   | 5 |
| 92  | PC_32-2    | 8.23    | 0.33   | 13 | 12.33   | 1.31   | 5 | 9.90    | 0.77   | 5 | 9.12    | 0.09   | 5 | 8.98    | 0.57   | 5 |
| 93  | PC_32-3    | 1.04    | 0.05   | 13 | 1.41    | 0.20   | 5 | 1.16    | 0.12   | 5 | 1.21    | 0.07   | 5 | 1.10    | 0.09   | 5 |
| 94  | PC_34-1    | 581.23  | 34.70  | 13 | 628.27  | 27.98  | 5 | 662.39  | 32.22  | 5 | 680.55  | 26.64  | 5 | 701.33  | 32.04  | 5 |
| 95  | PC_34-2    | 1812.34 | 40.26  | 13 | 1890.48 | 137.46 | 5 | 1887.70 | 91.81  | 5 | 1811.58 | 75.03  | 5 | 1988.28 | 47.97  | 5 |
| 96  | PC_34-3    | 88.38   | 4.23   | 13 | 102.92  | 5.57   | 5 | 91.65   | 6.08   | 5 | 94.76   | 2.20   | 5 | 98.70   | 3.46   | 5 |
| 97  | PC_34-4    | 5.24    | 0.22   | 13 | 7.60    | 0.90   | 5 | 5.36    | 0.27   | 5 | 5.02    | 0.03   | 5 | 4.95    | 0.28   | 5 |
| 98  | PC_36-0    | 8.41    | 0.42   | 13 | 12.51   | 1.52   | 5 | 11.14   | 0.48   | 5 | 13.27   | 1.61   | 5 | 10.24   | 0.37   | 5 |
| 99  | PC_36-1    | 245.86  | 19.87  | 13 | 256.77  | 16.37  | 5 | 329.33  | 32.53  | 5 | 365.29  | 11.90  | 5 | 426.84  | 11.60  | 5 |
| 100 | PC_36-2    | 1502.79 | 55.78  | 13 | 1538.85 | 93.12  | 5 | 1737.75 | 119.26 | 5 | 1752.85 | 49.05  | 5 | 1976.59 | 41.92  | 5 |

|     |           |         |       |    |         |       |   |         |       |   |         |       |   |         |       |   |
|-----|-----------|---------|-------|----|---------|-------|---|---------|-------|---|---------|-------|---|---------|-------|---|
| 101 | PC_36-3   | 628.50  | 29.10 | 13 | 610.20  | 35.19 | 5 | 596.30  | 29.69 | 5 | 568.47  | 11.44 | 5 | 628.93  | 18.52 | 5 |
| 102 | PC_36-4   | 1196.86 | 45.86 | 13 | 1274.15 | 88.40 | 5 | 1166.34 | 29.57 | 5 | 1152.39 | 44.25 | 5 | 1181.96 | 64.01 | 5 |
| 103 | PC_36-5   | 61.18   | 2.39  | 13 | 69.70   | 5.17  | 5 | 54.60   | 3.16  | 5 | 59.74   | 2.50  | 5 | 61.58   | 4.08  | 5 |
| 104 | PC_36-6   | 1.92    | 0.11  | 13 | 2.60    | 0.40  | 5 | 1.80    | 0.13  | 5 | 1.88    | 0.09  | 5 | 1.81    | 0.09  | 5 |
| 105 | PC_38-0   | 8.67    | 0.67  | 13 | 10.40   | 1.35  | 5 | 11.87   | 0.79  | 5 | 14.53   | 0.66  | 5 | 13.05   | 0.30  | 5 |
| 106 | PC_38-1   | 4.29    | 0.31  | 13 | 6.71    | 0.26  | 5 | 7.45    | 0.57  | 5 | 8.29    | 0.69  | 5 | 7.00    | 0.52  | 5 |
| 107 | PC_38-3   | 151.99  | 11.10 | 13 | 164.28  | 9.83  | 5 | 168.75  | 12.42 | 5 | 173.73  | 3.77  | 5 | 195.43  | 9.79  | 5 |
| 108 | PC_38-4   | 741.41  | 45.39 | 13 | 820.43  | 45.27 | 5 | 860.03  | 51.96 | 5 | 900.14  | 25.20 | 5 | 981.39  | 50.82 | 5 |
| 109 | PC_38-5   | 215.70  | 12.17 | 13 | 256.72  | 16.27 | 5 | 228.11  | 10.85 | 5 | 225.36  | 4.94  | 5 | 241.59  | 11.54 | 5 |
| 110 | PC_38-6   | 254.25  | 13.31 | 13 | 303.32  | 19.62 | 5 | 284.34  | 15.22 | 5 | 305.62  | 11.48 | 5 | 304.40  | 16.73 | 5 |
| 111 | PC_40-1   | 2.80    | 0.21  | 13 | 3.91    | 0.30  | 5 | 4.06    | 0.34  | 5 | 4.17    | 0.18  | 5 | 4.06    | 0.12  | 5 |
| 112 | PC_40-2   | 6.17    | 0.61  | 13 | 7.98    | 0.45  | 5 | 7.85    | 0.60  | 5 | 7.83    | 0.12  | 5 | 7.54    | 0.24  | 5 |
| 113 | PC_40-3   | 6.45    | 0.58  | 13 | 9.85    | 0.41  | 5 | 9.78    | 0.92  | 5 | 9.58    | 0.18  | 5 | 9.71    | 0.36  | 5 |
| 114 | PC_40-4   | 32.06   | 2.46  | 13 | 37.85   | 1.80  | 5 | 42.37   | 2.58  | 5 | 44.97   | 1.50  | 5 | 46.29   | 2.04  | 5 |
| 115 | PC_40-5   | 40.22   | 2.81  | 13 | 47.24   | 1.72  | 5 | 47.79   | 3.78  | 5 | 50.91   | 1.48  | 5 | 52.21   | 2.45  | 5 |
| 116 | PC_40-6   | 121.79  | 9.22  | 13 | 147.12  | 9.11  | 5 | 177.37  | 18.01 | 5 | 210.23  | 2.88  | 5 | 234.38  | 10.07 | 5 |
| 117 | PC_42-0   | 1.74    | 0.11  | 13 | 1.88    | 0.10  | 5 | 1.95    | 0.12  | 5 | 1.86    | 0.07  | 5 | 1.68    | 0.07  | 5 |
| 118 | PC_42-1   | 1.18    | 0.11  | 13 | 1.71    | 0.12  | 5 | 1.68    | 0.14  | 5 | 1.75    | 0.05  | 5 | 1.63    | 0.07  | 5 |
| 119 | PC_42-2   | 3.55    | 0.38  | 13 | 5.00    | 0.44  | 5 | 4.63    | 0.32  | 5 | 4.41    | 0.08  | 5 | 4.36    | 0.21  | 5 |
| 120 | PC_42-4   | 4.62    | 0.45  | 13 | 6.01    | 0.26  | 5 | 6.21    | 0.36  | 5 | 6.31    | 0.19  | 5 | 6.31    | 0.17  | 5 |
| 121 | PC_42-5   | 6.36    | 0.51  | 13 | 9.45    | 0.39  | 5 | 8.25    | 0.56  | 5 | 8.42    | 0.22  | 5 | 7.99    | 0.32  | 5 |
| 122 | PC_42-6   | 4.91    | 0.35  | 13 | 6.75    | 0.33  | 5 | 6.14    | 0.46  | 5 | 6.39    | 0.21  | 5 | 6.30    | 0.24  | 5 |
| 123 | PC_O-30-0 | 2.04    | 0.14  | 13 | 2.04    | 0.18  | 5 | 2.10    | 0.27  | 5 | 2.61    | 0.26  | 5 | 2.03    | 0.14  | 5 |
| 124 | PC_O-30-1 | 0.82    | 0.20  | 13 | 0.83    | 0.27  | 5 | 0.41    | 0.17  | 5 | 0.63    | 0.06  | 5 | 0.12    | 0.08  | 5 |
| 125 | PC_O-30-2 | 0.42    | 0.02  | 13 | 0.50    | 0.12  | 5 | 0.42    | 0.07  | 5 | 0.59    | 0.09  | 5 | 0.42    | 0.04  | 5 |
| 126 | PC_O-32-1 | 8.41    | 0.46  | 13 | 9.83    | 0.84  | 5 | 10.78   | 0.65  | 5 | 12.26   | 0.70  | 5 | 11.81   | 0.60  | 5 |
| 127 | PC_O-32-2 | 1.65    | 0.08  | 13 | 1.95    | 0.33  | 5 | 1.77    | 0.22  | 5 | 2.22    | 0.15  | 5 | 2.00    | 0.17  | 5 |
| 128 | PC_O-34-0 | 13.58   | 1.05  | 13 | 19.11   | 0.96  | 5 | 18.50   | 0.89  | 5 | 18.56   | 0.83  | 5 | 19.73   | 0.86  | 5 |
| 129 | PC_O-34-1 | 41.58   | 2.55  | 13 | 50.08   | 3.49  | 5 | 55.76   | 3.53  | 5 | 61.47   | 2.74  | 5 | 64.11   | 2.97  | 5 |
| 130 | PC_O-34-2 | 35.12   | 1.94  | 13 | 33.60   | 2.37  | 5 | 36.41   | 1.77  | 5 | 38.43   | 1.12  | 5 | 41.09   | 1.96  | 5 |
| 131 | PC_O-34-3 | 5.79    | 0.31  | 13 | 5.23    | 0.39  | 5 | 5.40    | 0.38  | 5 | 6.00    | 0.16  | 5 | 6.62    | 0.28  | 5 |
| 132 | PC_O-36-0 | 8.07    | 0.78  | 13 | 14.58   | 1.39  | 5 | 11.89   | 1.09  | 5 | 12.15   | 1.05  | 5 | 10.60   | 0.47  | 5 |
| 133 | PC_O-36-1 | 17.54   | 1.34  | 13 | 24.19   | 4.00  | 5 | 23.27   | 2.05  | 5 | 25.95   | 1.23  | 5 | 25.47   | 1.41  | 5 |
| 134 | PC_O-36-2 | 81.14   | 5.76  | 13 | 88.54   | 6.67  | 5 | 108.71  | 9.04  | 5 | 112.36  | 5.95  | 5 | 138.42  | 7.96  | 5 |
| 135 | PC_O-36-3 | 14.68   | 0.78  | 13 | 16.15   | 1.17  | 5 | 16.96   | 0.82  | 5 | 17.78   | 0.55  | 5 | 18.95   | 0.78  | 5 |
| 136 | PC_O-36-4 | 38.68   | 2.16  | 13 | 41.36   | 2.49  | 5 | 42.20   | 1.93  | 5 | 43.73   | 3.05  | 5 | 45.27   | 2.12  | 5 |
| 137 | PC_O-36-5 | 19.78   | 1.21  | 13 | 22.13   | 1.97  | 5 | 26.76   | 1.70  | 5 | 29.38   | 1.63  | 5 | 30.03   | 1.29  | 5 |
| 138 | PC_O-38-0 | 13.11   | 0.83  | 13 | 18.54   | 1.29  | 5 | 15.04   | 0.99  | 5 | 15.63   | 0.28  | 5 | 14.54   | 0.51  | 5 |
| 139 | PC_O-38-1 | 9.08    | 0.76  | 13 | 11.96   | 0.73  | 5 | 11.31   | 1.02  | 5 | 14.77   | 1.36  | 5 | 11.06   | 0.47  | 5 |
| 140 | PC_O-38-2 | 64.16   | 5.53  | 13 | 69.15   | 4.78  | 5 | 74.71   | 6.15  | 5 | 76.83   | 4.32  | 5 | 80.87   | 3.55  | 5 |
| 141 | PC_O-38-3 | 11.52   | 0.75  | 13 | 14.91   | 1.40  | 5 | 14.82   | 1.18  | 5 | 15.31   | 0.62  | 5 | 16.52   | 0.74  | 5 |
| 142 | PC_O-38-4 | 40.73   | 2.74  | 13 | 48.45   | 3.10  | 5 | 49.90   | 2.63  | 5 | 49.77   | 1.79  | 5 | 53.88   | 3.54  | 5 |
| 143 | PC_O-38-5 | 34.19   | 1.98  | 13 | 34.66   | 1.99  | 5 | 38.32   | 2.09  | 5 | 42.19   | 2.80  | 5 | 43.59   | 1.96  | 5 |
| 144 | PC_O-38-6 | 14.83   | 0.93  | 13 | 16.91   | 1.75  | 5 | 17.74   | 1.25  | 5 | 20.72   | 1.06  | 5 | 20.26   | 0.72  | 5 |
| 145 | PC_O-40-1 | 28.52   | 1.69  | 13 | 36.78   | 2.66  | 5 | 33.59   | 2.92  | 5 | 33.42   | 0.96  | 5 | 37.29   | 1.52  | 5 |
| 146 | PC_O-40-2 | 5.38    | 0.44  | 13 | 7.10    | 0.42  | 5 | 6.72    | 0.49  | 5 | 6.45    | 0.16  | 5 | 6.33    | 0.27  | 5 |
| 147 | PC_O-40-3 | 4.92    | 0.45  | 13 | 7.02    | 0.69  | 5 | 7.16    | 0.60  | 5 | 6.80    | 0.28  | 5 | 6.57    | 0.48  | 5 |
| 148 | PC_O-40-4 | 23.90   | 1.95  | 13 | 29.14   | 1.51  | 5 | 30.57   | 1.61  | 5 | 30.13   | 1.16  | 5 | 31.05   | 1.96  | 5 |
| 149 | PC_O-40-5 | 8.71    | 0.57  | 13 | 9.97    | 0.80  | 5 | 10.33   | 0.74  | 5 | 10.57   | 0.51  | 5 | 11.01   | 0.52  | 5 |
| 150 | PC_O-40-6 | 9.23    | 0.62  | 13 | 11.37   | 0.90  | 5 | 12.77   | 1.12  | 5 | 14.20   | 0.52  | 5 | 14.96   | 0.85  | 5 |
| 151 | PC_O-42-0 | 5.73    | 0.28  | 13 | 8.75    | 0.48  | 5 | 7.63    | 0.46  | 5 | 7.90    | 0.21  | 5 | 7.62    | 0.23  | 5 |

|     |                         |          |         |    |          |         |   |          |         |   |          |         |   |          |         |   |
|-----|-------------------------|----------|---------|----|----------|---------|---|----------|---------|---|----------|---------|---|----------|---------|---|
| 152 | PC_O-42-1               | 6.40     | 0.42    | 13 | 9.46     | 0.55    | 5 | 8.25     | 0.50    | 5 | 8.64     | 0.33    | 5 | 8.76     | 0.31    | 5 |
| 153 | PC_O-42-2               | 4.54     | 0.39    | 13 | 6.44     | 0.37    | 5 | 5.54     | 0.35    | 5 | 4.83     | 0.17    | 5 | 4.90     | 0.18    | 5 |
| 154 | PC_O-42-3               | 7.48     | 0.54    | 13 | 10.24    | 0.70    | 5 | 8.94     | 0.69    | 5 | 8.36     | 0.10    | 5 | 8.41     | 0.42    | 5 |
| 155 | PC_O-42-4               | 5.88     | 0.61    | 13 | 6.72     | 0.35    | 5 | 6.86     | 0.52    | 5 | 6.09     | 0.19    | 5 | 6.18     | 0.27    | 5 |
| 156 | PC_O-42-5               | 7.34     | 0.49    | 13 | 7.95     | 0.45    | 5 | 7.74     | 0.50    | 5 | 7.89     | 0.19    | 5 | 7.80     | 0.28    | 5 |
| 157 | PC_O-44-3               | 1.23     | 0.05    | 13 | 1.90     | 0.07    | 5 | 1.83     | 0.16    | 5 | 1.84     | 0.09    | 5 | 1.73     | 0.08    | 5 |
| 158 | PC_O-44-4               | 2.27     | 0.24    | 13 | 3.31     | 0.34    | 5 | 3.16     | 0.14    | 5 | 2.73     | 0.04    | 5 | 2.69     | 0.06    | 5 |
| 159 | PC_O-44-5               | 4.01     | 0.36    | 13 | 5.04     | 0.31    | 5 | 4.58     | 0.27    | 5 | 3.99     | 0.14    | 5 | 3.82     | 0.14    | 5 |
| 160 | PC_O-44-6               | 3.12     | 0.29    | 13 | 3.61     | 0.24    | 5 | 3.13     | 0.14    | 5 | 2.82     | 0.15    | 5 | 2.74     | 0.13    | 5 |
| 161 | SM_32-2 OH              | 21.30    | 1.29    | 13 | 20.23    | 2.11    | 5 | 19.20    | 1.20    | 5 | 19.65    | 1.65    | 5 | 19.53    | 1.79    | 5 |
| 162 | SM_34-2 OH              | 9.37     | 0.53    | 13 | 7.02     | 0.71    | 5 | 7.34     | 0.35    | 5 | 8.10     | 0.31    | 5 | 8.63     | 0.40    | 5 |
| 163 | SM_40-2 OH              | 12.77    | 1.42    | 13 | 12.71    | 1.11    | 5 | 20.38    | 1.54    | 5 | 20.78    | 0.96    | 5 | 20.68    | 1.33    | 5 |
| 164 | SM_40-3 OH              | 4.14     | 0.36    | 13 | 5.14     | 0.81    | 5 | 5.51     | 0.48    | 5 | 6.59     | 0.31    | 5 | 6.30     | 0.30    | 5 |
| 165 | SM_42-2 OH              | 1.79     | 0.18    | 13 | 1.88     | 0.20    | 5 | 2.51     | 0.22    | 5 | 2.85     | 0.11    | 5 | 2.74     | 0.07    | 5 |
| 166 | SM_34-1                 | 593.25   | 21.53   | 13 | 457.26   | 28.61   | 5 | 444.49   | 19.50   | 5 | 463.83   | 28.72   | 5 | 477.44   | 20.33   | 5 |
| 167 | SM_34-2                 | 7.61     | 0.28    | 13 | 9.50     | 0.80    | 5 | 8.94     | 0.64    | 5 | 9.48     | 0.69    | 5 | 9.11     | 0.48    | 5 |
| 168 | SM_36-1                 | 73.38    | 4.17    | 13 | 71.19    | 6.19    | 5 | 83.83    | 4.67    | 5 | 94.92    | 7.67    | 5 | 93.64    | 4.07    | 5 |
| 169 | SM_36-2                 | 5.08     | 0.26    | 13 | 5.49     | 0.57    | 5 | 6.66     | 0.49    | 5 | 7.74     | 0.49    | 5 | 7.54     | 0.41    | 5 |
| 170 | SM_38-3                 | 0.36     | 0.03    | 13 | 0.28     | 0.08    | 5 | 0.41     | 0.05    | 5 | 0.33     | 0.11    | 5 | 0.44     | 0.03    | 5 |
| 171 | SM_42-1                 | 40.50    | 4.10    | 13 | 45.33    | 3.50    | 5 | 62.92    | 4.62    | 5 | 74.01    | 3.22    | 5 | 72.99    | 3.03    | 5 |
| 172 | SM_42-2                 | 65.48    | 5.13    | 13 | 70.42    | 3.94    | 5 | 96.37    | 6.57    | 5 | 111.43   | 7.66    | 5 | 109.12   | 2.95    | 5 |
| 173 | H1                      | 2200.98  | 284.14  | 13 | 3712.28  | 269.52  | 5 | 2794.88  | 181.13  | 5 | 2984.65  | 274.20  | 5 | 3063.02  | 244.74  | 5 |
| 174 | C2,C3 / C0              | 0.22     | 0.02    | 13 | 0.16     | 0.03    | 5 | 0.03     | 0.01    | 5 | 0.17     | 0.01    | 5 | 0.20     | 0.02    | 5 |
| 175 | AAA                     | 1049.10  | 218.81  | 13 | 2368.44  | 441.99  | 5 | 2027.52  | 313.90  | 5 | 1960.44  | 121.70  | 5 | 2524.56  | 354.64  | 5 |
| 176 | ADMA / Arg              | 0.02     | 0.00    | 13 | 0.00     | 0.00    | 5 | 0.00     | 0.00    | 5 | 0.00     | 0.00    | 5 | 0.00     | 0.00    | 5 |
| 177 | BCAA                    | 2374.71  | 481.34  | 13 | 4608.12  | 865.48  | 5 | 3728.40  | 598.46  | 5 | 3566.40  | 328.54  | 5 | 4417.92  | 562.94  | 5 |
| 178 | C2 / C0                 | 0.22     | 0.02    | 13 | 0.16     | 0.03    | 5 | 0.03     | 0.00    | 5 | 0.16     | 0.02    | 5 | 0.19     | 0.02    | 5 |
| 179 | Cit / Arg               | 1.13     | 0.30    | 13 | 0.07     | 0.02    | 5 | 0.05     | 0.02    | 5 | 0.03     | 0.01    | 5 | 0.04     | 0.01    | 5 |
| 180 | Cit / Orn               | 10.54    | 3.18    | 13 | 1.56     | 0.43    | 5 | 1.45     | 0.52    | 5 | 1.26     | 0.32    | 5 | 1.34     | 0.37    | 5 |
| 181 | CPT-I ratio             | 0.02     | 0.00    | 13 | 0.01     | 0.00    | 5 | 0.00     | 0.00    | 5 | 0.02     | 0.00    | 5 | 0.02     | 0.00    | 5 |
| 182 | Essential AA            | 4655.84  | 893.72  | 13 | 9660.12  | 1733.07 | 5 | 8014.32  | 1223.03 | 5 | 7469.52  | 567.33  | 5 | 9716.28  | 1185.93 | 5 |
| 183 | Fisher ratio            | 2.32     | 0.04    | 13 | 1.94     | 0.05    | 5 | 1.85     | 0.07    | 5 | 1.81     | 0.09    | 5 | 1.79     | 0.10    | 5 |
| 184 | Glucogenic AA           | 8517.74  | 1040.16 | 13 | 14004.00 | 1636.83 | 5 | 12039.60 | 904.06  | 5 | 10899.60 | 540.19  | 5 | 13381.20 | 905.37  | 5 |
| 185 | Kynurenine / Trp        | 0.10     | 0.03    | 13 | 0.02     | 0.01    | 5 | 0.03     | 0.01    | 5 | 0.04     | 0.00    | 5 | 0.04     | 0.01    | 5 |
| 186 | Met-SO / Met            | 0.02     | 0.00    | 13 | 0.02     | 0.01    | 5 | 0.01     | 0.00    | 5 | 0.01     | 0.00    | 5 | 0.01     | 0.00    | 5 |
| 187 | MUFA_PC                 | 999.37   | 63.71   | 13 | 1130.53  | 61.19   | 5 | 1225.03  | 80.62   | 5 | 1296.63  | 30.17   | 5 | 1380.84  | 50.92   | 5 |
| 188 | MUFA_PC / SFA_PC        | 2.25     | 0.05    | 13 | 2.00     | 0.02    | 5 | 2.11     | 0.01    | 5 | 2.16     | 0.08    | 5 | 2.28     | 0.04    | 5 |
| 189 | Non essential AA        | 16812.83 | 1825.89 | 13 | 28085.38 | 3115.78 | 5 | 24510.31 | 1614.46 | 5 | 23618.63 | 1227.93 | 5 | 28447.62 | 2191.24 | 5 |
| 190 | Orn / Arg               | 0.11     | 0.02    | 13 | 0.05     | 0.00    | 5 | 0.04     | 0.01    | 5 | 0.03     | 0.00    | 5 | 0.03     | 0.00    | 5 |
| 191 | PUFA_PC                 | 7346.66  | 266.60  | 13 | 7835.59  | 489.10  | 5 | 7947.64  | 417.74  | 5 | 7972.96  | 219.81  | 5 | 8656.92  | 295.25  | 5 |
| 192 | PUFA_PC / MUFA_PC       | 7.55     | 0.28    | 13 | 6.92     | 0.09    | 5 | 6.52     | 0.14    | 5 | 6.15     | 0.11    | 5 | 6.27     | 0.03    | 5 |
| 193 | PUFA_PC / SFA_PC        | 16.91    | 0.47    | 13 | 13.85    | 0.18    | 5 | 13.76    | 0.24    | 5 | 13.32    | 0.55    | 5 | 14.31    | 0.27    | 5 |
| 194 | Putrescine / Orn        | 1.52     | 0.40    | 13 | 1.29     | 0.37    | 5 | 1.19     | 0.39    | 5 | 1.49     | 0.20    | 5 | 1.18     | 0.25    | 5 |
| 195 | Serotonin / Trp         | 0.27     | 0.09    | 13 | 0.02     | 0.00    | 5 | 0.02     | 0.00    | 5 | 0.01     | 0.00    | 5 | 0.04     | 0.01    | 5 |
| 196 | SFA_PC                  | 441.69   | 24.47   | 13 | 564.68   | 30.18   | 5 | 579.11   | 35.02   | 5 | 603.93   | 35.54   | 5 | 605.61   | 21.82   | 5 |
| 197 | Spermidine / Putrescine | 2.49     | 0.14    | 13 | 1.39     | 0.08    | 5 | 2.28     | 0.16    | 5 | 1.89     | 0.09    | 5 | 2.29     | 0.21    | 5 |
| 198 | Spermine / Spermidine   | 0.10     | 0.01    | 13 | 0.06     | 0.00    | 5 | 0.07     | 0.00    | 5 | 0.08     | 0.01    | 5 | 0.10     | 0.01    | 5 |
| 199 | Total_PC,SM             | 9623.05  | 389.04  | 13 | 10237.61 | 619.97  | 5 | 10510.81 | 566.45  | 5 | 10694.46 | 306.35  | 5 | 11472.33 | 391.75  | 5 |
| 200 | Total AA                | 21468.66 | 2685.70 | 13 | 37745.50 | 4794.84 | 5 | 32524.63 | 2777.19 | 5 | 31088.15 | 1778.08 | 5 | 38163.90 | 3357.04 | 5 |
| 201 | Total AC / C0           | 0.31     | 0.02    | 13 | 0.27     | 0.04    | 5 | 0.09     | 0.01    | 5 | 0.26     | 0.02    | 5 | 0.29     | 0.03    | 5 |
| 202 | Total AC-DC / Total AC  | 0.04     | 0.00    | 13 | 0.08     | 0.01    | 5 | 0.14     | 0.01    | 5 | 0.05     | 0.00    | 5 | 0.04     | 0.00    | 5 |

|     |                               |         |        |    |         |        |   |         |        |   |         |        |   |          |        |   |
|-----|-------------------------------|---------|--------|----|---------|--------|---|---------|--------|---|---------|--------|---|----------|--------|---|
| 203 | Total AC-OH / Total AC        | 0.04    | 0.00   | 13 | 0.05    | 0.00   | 5 | 0.07    | 0.00   | 5 | 0.05    | 0.00   | 5 | 0.04     | 0.00   | 5 |
| 204 | Total LPC                     | 396.59  | 16.45  | 13 | 417.84  | 21.63  | 5 | 415.73  | 16.19  | 5 | 456.27  | 15.30  | 5 | 484.58   | 27.54  | 5 |
| 205 | Total LPC / Total PC          | 0.05    | 0.00   | 13 | 0.04    | 0.00   | 5 | 0.04    | 0.00   | 5 | 0.04    | 0.00   | 5 | 0.05     | 0.00   | 5 |
| 206 | Total PC                      | 8787.72 | 352.32 | 13 | 9530.80 | 579.14 | 5 | 9751.79 | 529.66 | 5 | 9873.52 | 268.63 | 5 | 10643.37 | 365.06 | 5 |
| 207 | Total PC_diacyl               | 8182.16 | 313.26 | 13 | 8821.28 | 531.89 | 5 | 9009.78 | 482.56 | 5 | 9097.50 | 251.06 | 5 | 9824.12  | 331.19 | 5 |
| 208 | Total PC_ether                | 605.56  | 39.48  | 13 | 709.52  | 47.48  | 5 | 742.01  | 47.73  | 5 | 776.02  | 21.85  | 5 | 819.25   | 37.08  | 5 |
| 209 | Total SM                      | 835.33  | 37.71  | 13 | 706.81  | 44.60  | 5 | 759.02  | 37.53  | 5 | 820.94  | 49.48  | 5 | 828.96   | 31.27  | 5 |
| 210 | Total SM / Total_SM,PC        | 0.09    | 0.00   | 13 | 0.07    | 0.00   | 5 | 0.07    | 0.00   | 5 | 0.08    | 0.00   | 5 | 0.07     | 0.00   | 5 |
| 211 | Total SM / Total PC           | 0.10    | 0.00   | 13 | 0.07    | 0.00   | 5 | 0.08    | 0.00   | 5 | 0.08    | 0.00   | 5 | 0.08     | 0.00   | 5 |
| 212 | Total SM-non OH               | 785.96  | 34.48  | 13 | 659.83  | 41.41  | 5 | 704.07  | 34.94  | 5 | 762.96  | 47.09  | 5 | 771.07   | 29.10  | 5 |
| 213 | Total SM-OH                   | 49.37   | 3.49   | 13 | 46.98   | 3.80   | 5 | 54.95   | 2.93   | 5 | 57.98   | 2.83   | 5 | 57.88    | 2.41   | 5 |
| 214 | Total SM-OH / Total SM-non OH | 0.06    | 0.00   | 13 | 0.07    | 0.00   | 5 | 0.08    | 0.00   | 5 | 0.08    | 0.00   | 5 | 0.07     | 0.00   | 5 |
| 215 | Tyr / Phe                     | 0.85    | 0.02   | 13 | 0.87    | 0.02   | 5 | 0.81    | 0.04   | 5 | 0.90    | 0.05   | 5 | 0.79     | 0.04   | 5 |

**Table S3.** Day 3 jejunum metabolite concentrations. Values reported in pmol mg<sup>-1</sup> of tissue.

|    |               | Sham  |      |   | 8 Gy  |      |   | 10 Gy |      |   | 12 Gy |      |   | 14 Gy |      |   |
|----|---------------|-------|------|---|-------|------|---|-------|------|---|-------|------|---|-------|------|---|
|    |               | Mean  | SEM  | N |
| 1  | C0            | 26.29 | 1.93 | 8 | 29.46 | 3.20 | 3 | 24.75 | 3.29 | 3 | 35.70 | 2.60 | 3 | 33.70 | 6.09 | 3 |
| 2  | C10           | 0.28  | 0.02 | 8 | 0.39  | 0.02 | 3 | 0.32  | 0.03 | 3 | 0.29  | 0.04 | 3 | 0.34  | 0.05 | 3 |
| 3  | C10-1         | 0.12  | 0.01 | 8 | 0.15  | 0.01 | 3 | 0.12  | 0.01 | 3 | 0.12  | 0.01 | 3 | 0.14  | 0.02 | 3 |
| 4  | C10-2         | 0.10  | 0.00 | 8 | 0.10  | 0.00 | 3 | 0.09  | 0.00 | 3 | 0.10  | 0.01 | 3 | 0.10  | 0.01 | 3 |
| 5  | C12           | 0.09  | 0.01 | 8 | 0.09  | 0.01 | 3 | 0.08  | 0.00 | 3 | 0.08  | 0.00 | 3 | 0.09  | 0.02 | 3 |
| 6  | C12-DC        | 0.15  | 0.00 | 8 | 0.16  | 0.00 | 3 | 0.15  | 0.01 | 3 | 0.14  | 0.01 | 3 | 0.15  | 0.02 | 3 |
| 7  | C12-1         | 0.07  | 0.00 | 8 | 0.08  | 0.00 | 3 | 0.07  | 0.00 | 3 | 0.07  | 0.00 | 3 | 0.07  | 0.01 | 3 |
| 8  | C14           | 0.15  | 0.02 | 8 | 0.11  | 0.01 | 3 | 0.10  | 0.01 | 3 | 0.11  | 0.01 | 3 | 0.12  | 0.02 | 3 |
| 9  | C14-1         | 0.10  | 0.01 | 8 | 0.08  | 0.01 | 3 | 0.08  | 0.01 | 3 | 0.08  | 0.01 | 3 | 0.09  | 0.02 | 3 |
| 10 | C14-1 OH      | 0.04  | 0.00 | 8 | 0.04  | 0.00 | 3 | 0.04  | 0.00 | 3 | 0.04  | 0.00 | 3 | 0.04  | 0.01 | 3 |
| 11 | C14-2         | 0.05  | 0.01 | 8 | 0.05  | 0.00 | 3 | 0.04  | 0.00 | 3 | 0.05  | 0.00 | 3 | 0.05  | 0.01 | 3 |
| 12 | C14-2 OH      | 0.03  | 0.00 | 8 | 0.03  | 0.00 | 3 | 0.03  | 0.00 | 3 | 0.03  | 0.00 | 3 | 0.03  | 0.00 | 3 |
| 13 | C16           | 0.29  | 0.04 | 8 | 0.18  | 0.02 | 3 | 0.19  | 0.01 | 3 | 0.21  | 0.02 | 3 | 0.23  | 0.02 | 3 |
| 14 | C16-OH        | 0.03  | 0.00 | 8 | 0.03  | 0.00 | 3 | 0.02  | 0.00 | 3 | 0.03  | 0.00 | 3 | 0.03  | 0.00 | 3 |
| 15 | C16-1         | 0.09  | 0.01 | 8 | 0.05  | 0.01 | 3 | 0.06  | 0.01 | 3 | 0.06  | 0.01 | 3 | 0.07  | 0.01 | 3 |
| 16 | C16-1 OH      | 0.03  | 0.00 | 8 | 0.03  | 0.00 | 3 | 0.03  | 0.00 | 3 | 0.03  | 0.00 | 3 | 0.03  | 0.01 | 3 |
| 17 | C16-2         | 0.03  | 0.01 | 8 | 0.02  | 0.00 | 3 | 0.02  | 0.00 | 3 | 0.02  | 0.00 | 3 | 0.03  | 0.00 | 3 |
| 18 | C16-2 OH      | 0.02  | 0.00 | 8 | 0.02  | 0.00 | 3 | 0.02  | 0.00 | 3 | 0.02  | 0.00 | 3 | 0.02  | 0.00 | 3 |
| 19 | C18           | 0.09  | 0.01 | 8 | 0.07  | 0.00 | 3 | 0.06  | 0.00 | 3 | 0.07  | 0.01 | 3 | 0.08  | 0.00 | 3 |
| 20 | C18-1         | 0.24  | 0.04 | 8 | 0.14  | 0.02 | 3 | 0.15  | 0.02 | 3 | 0.17  | 0.03 | 3 | 0.18  | 0.03 | 3 |
| 21 | C18-1 OH      | 0.03  | 0.00 | 8 | 0.03  | 0.00 | 3 | 0.03  | 0.00 | 3 | 0.03  | 0.00 | 3 | 0.03  | 0.00 | 3 |
| 22 | C18-2         | 0.13  | 0.03 | 8 | 0.08  | 0.01 | 3 | 0.09  | 0.01 | 3 | 0.10  | 0.02 | 3 | 0.10  | 0.02 | 3 |
| 23 | C2            | 20.68 | 2.07 | 8 | 25.66 | 1.96 | 3 | 20.73 | 2.08 | 3 | 24.07 | 1.84 | 3 | 28.58 | 3.50 | 3 |
| 24 | C3            | 0.54  | 0.06 | 8 | 0.83  | 0.02 | 3 | 0.50  | 0.07 | 3 | 0.67  | 0.04 | 3 | 0.69  | 0.12 | 3 |
| 25 | C3-DC_C4-OH   | 0.14  | 0.01 | 8 | 0.12  | 0.01 | 3 | 0.11  | 0.01 | 3 | 0.13  | 0.01 | 3 | 0.15  | 0.02 | 3 |
| 26 | C3-OH         | 0.04  | 0.00 | 8 | 0.05  | 0.00 | 3 | 0.05  | 0.00 | 3 | 0.04  | 0.00 | 3 | 0.05  | 0.01 | 3 |
| 27 | C3-1          | 0.04  | 0.00 | 8 | 0.04  | 0.00 | 3 | 0.04  | 0.00 | 3 | 0.04  | 0.00 | 3 | 0.04  | 0.01 | 3 |
| 28 | C4            | 0.57  | 0.10 | 8 | 0.82  | 0.07 | 3 | 0.52  | 0.04 | 3 | 0.61  | 0.10 | 3 | 0.68  | 0.09 | 3 |
| 29 | C4-1          | 0.04  | 0.00 | 8 | 0.05  | 0.00 | 3 | 0.04  | 0.00 | 3 | 0.04  | 0.00 | 3 | 0.04  | 0.01 | 3 |
| 30 | C5            | 0.13  | 0.01 | 8 | 0.16  | 0.00 | 3 | 0.14  | 0.02 | 3 | 0.15  | 0.01 | 3 | 0.17  | 0.00 | 3 |
| 31 | C5-DC_C6-OH   | 0.04  | 0.01 | 8 | 0.03  | 0.01 | 3 | 0.03  | 0.00 | 3 | 0.03  | 0.00 | 3 | 0.04  | 0.01 | 3 |
| 32 | C5-M-DC       | 0.05  | 0.01 | 8 | 0.07  | 0.00 | 3 | 0.06  | 0.00 | 3 | 0.06  | 0.01 | 3 | 0.07  | 0.01 | 3 |
| 33 | C5-OH_C3-DC-M | 0.13  | 0.02 | 8 | 0.19  | 0.01 | 3 | 0.16  | 0.01 | 3 | 0.14  | 0.04 | 3 | 0.17  | 0.01 | 3 |

|    |            |        |        |   |         |       |   |        |        |   |         |        |   |         |        |   |
|----|------------|--------|--------|---|---------|-------|---|--------|--------|---|---------|--------|---|---------|--------|---|
| 34 | C5-1       | 0.04   | 0.00   | 8 | 0.04    | 0.00  | 3 | 0.04   | 0.00   | 3 | 0.04    | 0.00   | 3 | 0.04    | 0.00   | 3 |
| 35 | C5-1 DC    | 0.05   | 0.01   | 8 | 0.05    | 0.01  | 3 | 0.04   | 0.01   | 3 | 0.04    | 0.00   | 3 | 0.05    | 0.02   | 3 |
| 36 | C6_C4-1 DC | 0.11   | 0.01   | 8 | 0.12    | 0.01  | 3 | 0.11   | 0.01   | 3 | 0.11    | 0.02   | 3 | 0.13    | 0.03   | 3 |
| 37 | C6-1       | 0.04   | 0.00   | 8 | 0.05    | 0.00  | 3 | 0.04   | 0.00   | 3 | 0.04    | 0.00   | 3 | 0.04    | 0.01   | 3 |
| 38 | C7-DC      | 0.03   | 0.00   | 8 | 0.04    | 0.00  | 3 | 0.03   | 0.00   | 3 | 0.03    | 0.00   | 3 | 0.03    | 0.00   | 3 |
| 39 | C8         | 0.21   | 0.02   | 8 | 0.34    | 0.03  | 3 | 0.27   | 0.04   | 3 | 0.23    | 0.04   | 3 | 0.28    | 0.05   | 3 |
| 40 | C9         | 0.11   | 0.01   | 8 | 0.15    | 0.01  | 3 | 0.12   | 0.01   | 3 | 0.11    | 0.02   | 3 | 0.14    | 0.02   | 3 |
| 41 | Ala        | 447.75 | 43.72  | 8 | 544.67  | 71.17 | 3 | 496.33 | 26.43  | 3 | 587.00  | 86.16  | 3 | 528.67  | 48.70  | 3 |
| 42 | Arg        | 105.80 | 8.83   | 8 | 114.33  | 6.84  | 3 | 88.03  | 7.42   | 3 | 182.33  | 14.95  | 3 | 133.00  | 15.31  | 3 |
| 43 | Asn        | 74.78  | 8.90   | 8 | 90.37   | 3.42  | 3 | 82.17  | 2.60   | 3 | 84.70   | 16.35  | 3 | 88.07   | 5.55   | 3 |
| 44 | Asp        | 215.20 | 54.31  | 8 | 141.33  | 12.33 | 3 | 200.03 | 111.53 | 3 | 302.33  | 24.36  | 3 | 157.83  | 70.11  | 3 |
| 45 | Cit        | 62.98  | 7.01   | 8 | 41.17   | 2.70  | 3 | 47.50  | 3.20   | 3 | 56.43   | 9.77   | 3 | 53.77   | 2.89   | 3 |
| 46 | Gln        | 698.50 | 116.03 | 8 | 1070.00 | 20.00 | 3 | 806.00 | 122.70 | 3 | 508.33  | 66.52  | 3 | 1281.33 | 473.85 | 3 |
| 47 | Glu        | 65.18  | 7.98   | 8 | 57.27   | 2.57  | 3 | 45.40  | 1.29   | 3 | 1309.90 | 644.02 | 3 | 57.03   | 20.04  | 3 |
| 48 | Gly        | 262.25 | 24.53  | 8 | 243.00  | 14.93 | 3 | 284.00 | 14.22  | 3 | 295.00  | 16.62  | 3 | 260.33  | 47.51  | 3 |
| 49 | His        | 73.18  | 5.43   | 8 | 92.17   | 2.50  | 3 | 85.73  | 1.89   | 3 | 110.63  | 12.35  | 3 | 111.07  | 6.96   | 3 |
| 50 | Ile        | 106.36 | 11.70  | 8 | 100.27  | 5.96  | 3 | 96.17  | 3.72   | 3 | 121.93  | 21.14  | 3 | 119.00  | 8.14   | 3 |
| 51 | Leu        | 179.50 | 20.98  | 8 | 235.33  | 15.76 | 3 | 195.00 | 12.74  | 3 | 231.00  | 37.87  | 3 | 246.33  | 18.35  | 3 |
| 52 | Met        | 62.84  | 4.89   | 8 | 80.27   | 12.11 | 3 | 66.43  | 2.00   | 3 | 92.17   | 17.59  | 3 | 83.73   | 11.09  | 3 |
| 53 | Phe        | 68.89  | 7.28   | 8 | 82.33   | 6.70  | 3 | 73.00  | 2.99   | 3 | 94.33   | 8.75   | 3 | 93.37   | 7.58   | 3 |
| 54 | Pro        | 103.91 | 17.62  | 8 | 111.93  | 21.76 | 3 | 93.77  | 6.17   | 3 | 112.93  | 16.55  | 3 | 111.77  | 11.23  | 3 |
| 55 | Ser        | 131.74 | 8.87   | 8 | 165.67  | 18.76 | 3 | 158.67 | 6.84   | 3 | 215.00  | 43.55  | 3 | 203.00  | 15.62  | 3 |
| 56 | Thr        | 174.13 | 15.83  | 8 | 222.00  | 27.87 | 3 | 250.33 | 18.22  | 3 | 258.00  | 31.63  | 3 | 280.67  | 37.29  | 3 |
| 57 | Trp        | 66.81  | 6.15   | 8 | 69.10   | 11.54 | 3 | 65.13  | 1.56   | 3 | 87.70   | 10.70  | 3 | 72.67   | 6.89   | 3 |
| 58 | Tyr        | 97.31  | 9.07   | 8 | 111.47  | 16.85 | 3 | 90.70  | 3.25   | 3 | 102.70  | 14.72  | 3 | 105.03  | 11.24  | 3 |
| 59 | Val        | 204.00 | 23.35  | 8 | 225.00  | 16.56 | 3 | 208.00 | 9.85   | 3 | 212.00  | 25.74  | 3 | 246.00  | 4.04   | 3 |
| 60 | Histamine  | 0.40   | 0.03   | 8 | 0.41    | 0.02  | 3 | 0.44   | 0.07   | 3 | 0.56    | 0.06   | 3 | 0.38    | 0.02   | 3 |
| 61 | Kynurenine | 1.03   | 0.10   | 8 | 0.90    | 0.03  | 3 | 0.72   | 0.09   | 3 | 1.17    | 0.16   | 3 | 1.04    | 0.14   | 3 |
| 62 | Met-SO     | 1.64   | 0.24   | 8 | 2.07    | 0.42  | 3 | 1.43   | 0.17   | 3 | 2.20    | 0.25   | 3 | 1.67    | 0.22   | 3 |
| 63 | total DMA  | 0.47   | 0.08   | 8 | 0.28    | 0.03  | 3 | 0.34   | 0.13   | 3 | 0.72    | 0.04   | 3 | 1.00    | 0.59   | 3 |
| 64 | LPC_14-0   | 2.60   | 0.12   | 8 | 2.47    | 0.08  | 3 | 2.34   | 0.14   | 3 | 2.33    | 0.04   | 3 | 2.44    | 0.14   | 3 |
| 65 | LPC_16-0   | 192.20 | 10.20  | 8 | 183.50  | 15.51 | 3 | 180.82 | 14.72  | 3 | 197.08  | 11.71  | 3 | 205.85  | 7.38   | 3 |
| 66 | LPC_16-1   | 5.40   | 0.43   | 8 | 2.66    | 0.30  | 3 | 2.85   | 0.29   | 3 | 3.44    | 0.28   | 3 | 3.28    | 0.03   | 3 |
| 67 | LPC_17-0   | 2.21   | 0.07   | 8 | 2.37    | 0.28  | 3 | 2.52   | 0.26   | 3 | 2.93    | 0.26   | 3 | 2.67    | 0.19   | 3 |
| 68 | LPC_18-0   | 74.33  | 3.60   | 8 | 91.56   | 9.09  | 3 | 92.22  | 6.91   | 3 | 100.61  | 7.61   | 3 | 105.47  | 4.54   | 3 |
| 69 | LPC_18-1   | 44.34  | 3.53   | 8 | 30.99   | 2.90  | 3 | 29.84  | 2.82   | 3 | 37.39   | 2.48   | 3 | 34.86   | 0.42   | 3 |
| 70 | LPC_18-2   | 133.55 | 11.38  | 8 | 129.12  | 11.48 | 3 | 116.95 | 5.94   | 3 | 135.67  | 7.61   | 3 | 133.76  | 0.92   | 3 |
| 71 | LPC_20-3   | 8.68   | 0.75   | 8 | 5.53    | 0.46  | 3 | 4.74   | 0.30   | 3 | 6.41    | 0.53   | 3 | 6.03    | 0.33   | 3 |
| 72 | LPC_20-4   | 43.69  | 3.50   | 8 | 36.08   | 3.34  | 3 | 34.69  | 3.18   | 3 | 48.86   | 3.40   | 3 | 40.87   | 2.81   | 3 |
| 73 | LPC_24-0   | 1.16   | 0.05   | 8 | 1.42    | 0.08  | 3 | 1.43   | 0.10   | 3 | 1.57    | 0.04   | 3 | 1.63    | 0.26   | 3 |
| 74 | LPC_26-0   | 1.44   | 0.08   | 8 | 1.43    | 0.16  | 3 | 1.43   | 0.25   | 3 | 1.42    | 0.08   | 3 | 1.55    | 0.32   | 3 |
| 75 | LPC_26-1   | 0.90   | 0.06   | 8 | 0.81    | 0.10  | 3 | 0.91   | 0.13   | 3 | 0.92    | 0.10   | 3 | 0.91    | 0.20   | 3 |
| 76 | LPC_28-0   | 0.95   | 0.05   | 8 | 1.10    | 0.13  | 3 | 1.09   | 0.18   | 3 | 1.12    | 0.04   | 3 | 1.21    | 0.23   | 3 |
| 77 | LPC_28-1   | 1.04   | 0.06   | 8 | 1.05    | 0.14  | 3 | 1.20   | 0.14   | 3 | 1.23    | 0.08   | 3 | 1.20    | 0.27   | 3 |
| 78 | PC_24-0    | 0.55   | 0.04   | 8 | 0.48    | 0.07  | 3 | 0.56   | 0.06   | 3 | 0.62    | 0.03   | 3 | 0.63    | 0.12   | 3 |
| 79 | PC_26-0    | 4.62   | 0.38   | 8 | 4.07    | 0.70  | 3 | 4.44   | 0.60   | 3 | 4.21    | 0.28   | 3 | 4.57    | 0.69   | 3 |
| 80 | PC_28-1    | 1.04   | 0.05   | 8 | 0.96    | 0.13  | 3 | 1.05   | 0.11   | 3 | 1.07    | 0.07   | 3 | 1.08    | 0.14   | 3 |
| 81 | PC_30-0    | 1.16   | 0.06   | 8 | 1.10    | 0.06  | 3 | 1.06   | 0.02   | 3 | 1.23    | 0.03   | 3 | 1.22    | 0.05   | 3 |
| 82 | PC_30-2    | 0.31   | 0.02   | 8 | 0.23    | 0.06  | 3 | 0.27   | 0.05   | 3 | 0.31    | 0.03   | 3 | 0.28    | 0.06   | 3 |
| 83 | PC_32-0    | 19.73  | 1.75   | 8 | 19.44   | 1.16  | 3 | 17.98  | 1.20   | 3 | 22.67   | 1.04   | 3 | 21.27   | 0.54   | 3 |
| 84 | PC_32-1    | 12.01  | 1.12   | 8 | 6.08    | 0.30  | 3 | 6.09   | 0.48   | 3 | 7.42    | 0.50   | 3 | 7.34    | 0.05   | 3 |



|     |           |        |       |   |        |       |   |        |       |   |        |       |   |        |       |   |
|-----|-----------|--------|-------|---|--------|-------|---|--------|-------|---|--------|-------|---|--------|-------|---|
| 85  | PC_32-2   | 2.82   | 0.19  | 8 | 1.49   | 0.08  | 3 | 1.52   | 0.14  | 3 | 1.76   | 0.14  | 3 | 1.72   | 0.04  | 3 |
| 86  | PC_32-3   | 0.44   | 0.03  | 8 | 0.37   | 0.03  | 3 | 0.41   | 0.01  | 3 | 0.44   | 0.01  | 3 | 0.44   | 0.04  | 3 |
| 87  | PC_34-1   | 214.13 | 14.52 | 8 | 155.95 | 5.35  | 3 | 143.49 | 9.87  | 3 | 172.45 | 11.20 | 3 | 178.89 | 5.73  | 3 |
| 88  | PC_34-2   | 324.19 | 36.22 | 8 | 385.46 | 52.98 | 3 | 376.16 | 29.36 | 3 | 317.28 | 50.02 | 3 | 352.95 | 56.30 | 3 |
| 89  | PC_34-3   | 40.00  | 2.52  | 8 | 24.27  | 1.25  | 3 | 23.66  | 2.44  | 3 | 26.92  | 2.32  | 3 | 26.24  | 0.89  | 3 |
| 90  | PC_34-4   | 1.38   | 0.08  | 8 | 0.79   | 0.03  | 3 | 0.81   | 0.07  | 3 | 1.02   | 0.09  | 3 | 0.89   | 0.02  | 3 |
| 91  | PC_36-0   | 2.09   | 0.09  | 8 | 2.21   | 0.05  | 3 | 2.23   | 0.12  | 3 | 2.41   | 0.23  | 3 | 2.48   | 0.22  | 3 |
| 92  | PC_36-1   | 48.49  | 2.71  | 8 | 46.48  | 2.54  | 3 | 42.02  | 2.45  | 3 | 56.06  | 5.13  | 3 | 54.92  | 3.58  | 3 |
| 93  | PC_36-2   | 286.26 | 17.20 | 8 | 329.84 | 25.69 | 3 | 303.27 | 19.06 | 3 | 312.14 | 27.55 | 3 | 330.76 | 12.76 | 3 |
| 94  | PC_36-3   | 144.30 | 7.62  | 8 | 123.46 | 8.05  | 3 | 112.89 | 9.56  | 3 | 139.02 | 7.91  | 3 | 130.98 | 4.71  | 3 |
| 95  | PC_36-4   | 268.76 | 14.22 | 8 | 244.31 | 14.62 | 3 | 230.05 | 21.96 | 3 | 265.39 | 16.02 | 3 | 260.71 | 8.66  | 3 |
| 96  | PC_36-5   | 16.97  | 1.05  | 8 | 11.02  | 0.79  | 3 | 10.90  | 1.29  | 3 | 14.37  | 1.27  | 3 | 12.18  | 0.13  | 3 |
| 97  | PC_36-6   | 0.81   | 0.04  | 8 | 0.49   | 0.03  | 3 | 0.47   | 0.04  | 3 | 0.61   | 0.06  | 3 | 0.55   | 0.02  | 3 |
| 98  | PC_38-0   | 2.36   | 0.10  | 8 | 2.72   | 0.18  | 3 | 2.64   | 0.15  | 3 | 3.73   | 0.26  | 3 | 3.37   | 0.11  | 3 |
| 99  | PC_38-1   | 0.90   | 0.05  | 8 | 0.83   | 0.12  | 3 | 0.92   | 0.13  | 3 | 1.12   | 0.06  | 3 | 1.18   | 0.02  | 3 |
| 100 | PC_38-3   | 41.65  | 2.40  | 8 | 32.33  | 1.41  | 3 | 30.31  | 2.80  | 3 | 42.73  | 3.01  | 3 | 39.99  | 0.70  | 3 |
| 101 | PC_38-4   | 171.13 | 7.31  | 8 | 166.01 | 10.94 | 3 | 162.32 | 16.98 | 3 | 205.38 | 14.45 | 3 | 197.10 | 9.04  | 3 |
| 102 | PC_38-5   | 68.43  | 3.58  | 8 | 43.65  | 2.86  | 3 | 42.97  | 6.01  | 3 | 65.06  | 4.94  | 3 | 52.83  | 0.95  | 3 |
| 103 | PC_38-6   | 207.32 | 10.93 | 8 | 170.70 | 5.08  | 3 | 163.61 | 11.53 | 3 | 204.93 | 16.12 | 3 | 201.31 | 10.55 | 3 |
| 104 | PC_40-1   | 0.43   | 0.01  | 8 | 0.42   | 0.03  | 3 | 0.40   | 0.01  | 3 | 0.52   | 0.03  | 3 | 0.48   | 0.01  | 3 |
| 105 | PC_40-2   | 0.59   | 0.03  | 8 | 0.54   | 0.03  | 3 | 0.49   | 0.04  | 3 | 0.59   | 0.04  | 3 | 0.58   | 0.02  | 3 |
| 106 | PC_40-3   | 1.08   | 0.05  | 8 | 0.78   | 0.04  | 3 | 0.72   | 0.06  | 3 | 0.89   | 0.07  | 3 | 0.89   | 0.04  | 3 |
| 107 | PC_40-4   | 4.88   | 0.21  | 8 | 3.95   | 0.26  | 3 | 3.59   | 0.38  | 3 | 4.76   | 0.44  | 3 | 4.56   | 0.16  | 3 |
| 108 | PC_40-5   | 8.77   | 0.52  | 8 | 5.74   | 0.37  | 3 | 5.72   | 0.74  | 3 | 8.55   | 1.02  | 3 | 7.37   | 0.20  | 3 |
| 109 | PC_40-6   | 69.42  | 5.57  | 8 | 65.99  | 2.15  | 3 | 64.77  | 5.32  | 3 | 88.22  | 9.06  | 3 | 86.14  | 3.56  | 3 |
| 110 | PC_42-0   | 0.39   | 0.02  | 8 | 0.36   | 0.02  | 3 | 0.33   | 0.02  | 3 | 0.45   | 0.05  | 3 | 0.41   | 0.01  | 3 |
| 111 | PC_42-1   | 0.26   | 0.01  | 8 | 0.23   | 0.01  | 3 | 0.23   | 0.01  | 3 | 0.32   | 0.02  | 3 | 0.30   | 0.01  | 3 |
| 112 | PC_42-2   | 0.33   | 0.01  | 8 | 0.34   | 0.02  | 3 | 0.29   | 0.01  | 3 | 0.35   | 0.01  | 3 | 0.35   | 0.01  | 3 |
| 113 | PC_42-4   | 0.41   | 0.02  | 8 | 0.39   | 0.02  | 3 | 0.35   | 0.03  | 3 | 0.46   | 0.03  | 3 | 0.45   | 0.00  | 3 |
| 114 | PC_42-5   | 0.59   | 0.03  | 8 | 0.47   | 0.03  | 3 | 0.45   | 0.05  | 3 | 0.58   | 0.05  | 3 | 0.55   | 0.02  | 3 |
| 115 | PC_42-6   | 1.74   | 0.09  | 8 | 1.46   | 0.09  | 3 | 1.37   | 0.13  | 3 | 1.59   | 0.15  | 3 | 1.69   | 0.09  | 3 |
| 116 | PC_O-30-0 | 0.29   | 0.01  | 8 | 0.29   | 0.03  | 3 | 0.30   | 0.02  | 3 | 0.32   | 0.01  | 3 | 0.33   | 0.03  | 3 |
| 117 | PC_O-30-1 | 1.02   | 0.10  | 8 | 0.97   | 0.19  | 3 | 1.01   | 0.15  | 3 | 0.97   | 0.10  | 3 | 0.99   | 0.16  | 3 |
| 118 | PC_O-30-2 | 0.22   | 0.01  | 8 | 0.19   | 0.03  | 3 | 0.21   | 0.02  | 3 | 0.23   | 0.01  | 3 | 0.23   | 0.03  | 3 |
| 119 | PC_O-32-1 | 1.50   | 0.08  | 8 | 1.80   | 0.13  | 3 | 1.88   | 0.11  | 3 | 2.03   | 0.04  | 3 | 2.04   | 0.18  | 3 |
| 120 | PC_O-32-2 | 0.71   | 0.04  | 8 | 0.65   | 0.05  | 3 | 0.69   | 0.02  | 3 | 0.74   | 0.01  | 3 | 0.70   | 0.04  | 3 |
| 121 | PC_O-34-0 | 0.68   | 0.03  | 8 | 0.70   | 0.04  | 3 | 0.71   | 0.06  | 3 | 0.85   | 0.04  | 3 | 0.73   | 0.02  | 3 |
| 122 | PC_O-34-1 | 5.62   | 0.26  | 8 | 5.51   | 0.31  | 3 | 5.39   | 0.38  | 3 | 6.86   | 0.36  | 3 | 6.68   | 0.25  | 3 |
| 123 | PC_O-34-2 | 7.31   | 0.36  | 8 | 7.57   | 0.43  | 3 | 7.55   | 0.63  | 3 | 8.37   | 0.50  | 3 | 8.22   | 0.19  | 3 |
| 124 | PC_O-34-3 | 1.97   | 0.12  | 8 | 1.91   | 0.06  | 3 | 1.86   | 0.10  | 3 | 2.08   | 0.12  | 3 | 2.14   | 0.03  | 3 |
| 125 | PC_O-36-0 | 0.66   | 0.02  | 8 | 0.70   | 0.04  | 3 | 0.67   | 0.05  | 3 | 0.74   | 0.06  | 3 | 0.73   | 0.01  | 3 |
| 126 | PC_O-36-1 | 3.41   | 0.14  | 8 | 2.88   | 0.15  | 3 | 2.74   | 0.19  | 3 | 3.35   | 0.26  | 3 | 3.13   | 0.05  | 3 |
| 127 | PC_O-36-2 | 14.14  | 0.66  | 8 | 16.19  | 1.46  | 3 | 15.00  | 1.03  | 3 | 17.81  | 1.33  | 3 | 16.50  | 0.62  | 3 |
| 128 | PC_O-36-3 | 3.86   | 0.15  | 8 | 3.73   | 0.31  | 3 | 3.45   | 0.28  | 3 | 4.31   | 0.30  | 3 | 3.98   | 0.07  | 3 |
| 129 | PC_O-36-4 | 6.98   | 0.32  | 8 | 9.04   | 0.56  | 3 | 8.92   | 0.45  | 3 | 11.11  | 0.45  | 3 | 11.11  | 0.39  | 3 |
| 130 | PC_O-36-5 | 2.96   | 0.14  | 8 | 3.73   | 0.18  | 3 | 3.69   | 0.36  | 3 | 4.76   | 0.34  | 3 | 4.52   | 0.12  | 3 |
| 131 | PC_O-38-0 | 6.15   | 0.30  | 8 | 3.49   | 0.16  | 3 | 3.47   | 0.37  | 3 | 4.83   | 0.60  | 3 | 4.07   | 0.10  | 3 |
| 132 | PC_O-38-1 | 1.15   | 0.04  | 8 | 1.15   | 0.06  | 3 | 1.19   | 0.09  | 3 | 1.36   | 0.08  | 3 | 1.27   | 0.03  | 3 |
| 133 | PC_O-38-2 | 8.84   | 0.48  | 8 | 12.35  | 1.32  | 3 | 11.73  | 0.53  | 3 | 12.03  | 0.67  | 3 | 12.48  | 0.46  | 3 |
| 134 | PC_O-38-3 | 2.41   | 0.09  | 8 | 2.24   | 0.16  | 3 | 2.12   | 0.20  | 3 | 2.67   | 0.16  | 3 | 2.50   | 0.06  | 3 |
| 135 | PC_O-38-4 | 7.68   | 0.29  | 8 | 7.98   | 0.60  | 3 | 7.90   | 0.76  | 3 | 10.86  | 0.85  | 3 | 9.41   | 0.32  | 3 |

|     |                        |          |         |   |          |         |   |          |        |   |          |         |   |          |        |   |
|-----|------------------------|----------|---------|---|----------|---------|---|----------|--------|---|----------|---------|---|----------|--------|---|
| 136 | PC_O-38-5              | 5.91     | 0.25    | 8 | 7.57     | 0.52    | 3 | 7.41     | 0.44   | 3 | 10.61    | 0.52    | 3 | 9.60     | 0.39   | 3 |
| 137 | PC_O-38-6              | 3.95     | 0.18    | 8 | 4.64     | 0.24    | 3 | 4.54     | 0.23   | 3 | 6.12     | 0.35    | 3 | 5.79     | 0.19   | 3 |
| 138 | PC_O-40-1              | 6.33     | 0.33    | 8 | 4.70     | 0.50    | 3 | 4.49     | 0.37   | 3 | 6.65     | 0.68    | 3 | 5.20     | 0.26   | 3 |
| 139 | PC_O-40-2              | 1.01     | 0.04    | 8 | 0.87     | 0.06    | 3 | 0.84     | 0.05   | 3 | 1.10     | 0.11    | 3 | 1.00     | 0.01   | 3 |
| 140 | PC_O-40-3              | 1.05     | 0.06    | 8 | 0.90     | 0.07    | 3 | 0.88     | 0.07   | 3 | 1.08     | 0.06    | 3 | 1.11     | 0.04   | 3 |
| 141 | PC_O-40-4              | 3.54     | 0.14    | 8 | 3.77     | 0.32    | 3 | 3.97     | 0.48   | 3 | 4.79     | 0.30    | 3 | 4.39     | 0.11   | 3 |
| 142 | PC_O-40-5              | 1.64     | 0.07    | 8 | 1.69     | 0.09    | 3 | 1.67     | 0.13   | 3 | 2.36     | 0.17    | 3 | 2.09     | 0.05   | 3 |
| 143 | PC_O-40-6              | 4.04     | 0.22    | 8 | 4.04     | 0.19    | 3 | 3.97     | 0.35   | 3 | 5.64     | 0.55    | 3 | 4.95     | 0.19   | 3 |
| 144 | PC_O-42-0              | 1.66     | 0.06    | 8 | 1.34     | 0.05    | 3 | 1.33     | 0.16   | 3 | 1.72     | 0.17    | 3 | 1.66     | 0.02   | 3 |
| 145 | PC_O-42-1              | 1.15     | 0.04    | 8 | 0.95     | 0.05    | 3 | 1.00     | 0.07   | 3 | 1.40     | 0.10    | 3 | 1.22     | 0.08   | 3 |
| 146 | PC_O-42-2              | 0.74     | 0.03    | 8 | 0.51     | 0.05    | 3 | 0.47     | 0.04   | 3 | 0.67     | 0.06    | 3 | 0.59     | 0.01   | 3 |
| 147 | PC_O-42-3              | 1.97     | 0.09    | 8 | 1.40     | 0.16    | 3 | 1.36     | 0.09   | 3 | 2.01     | 0.21    | 3 | 1.61     | 0.06   | 3 |
| 148 | PC_O-42-4              | 0.46     | 0.02    | 8 | 0.51     | 0.03    | 3 | 0.45     | 0.02   | 3 | 0.61     | 0.03    | 3 | 0.57     | 0.02   | 3 |
| 149 | PC_O-42-5              | 0.88     | 0.03    | 8 | 0.91     | 0.03    | 3 | 0.91     | 0.06   | 3 | 1.13     | 0.07    | 3 | 1.09     | 0.03   | 3 |
| 150 | PC_O-44-3              | 0.24     | 0.01    | 8 | 0.20     | 0.02    | 3 | 0.22     | 0.01   | 3 | 0.26     | 0.01    | 3 | 0.24     | 0.02   | 3 |
| 151 | PC_O-44-4              | 0.24     | 0.01    | 8 | 0.20     | 0.01    | 3 | 0.20     | 0.01   | 3 | 0.25     | 0.01    | 3 | 0.23     | 0.00   | 3 |
| 152 | PC_O-44-5              | 0.36     | 0.02    | 8 | 0.32     | 0.02    | 3 | 0.32     | 0.01   | 3 | 0.42     | 0.03    | 3 | 0.37     | 0.01   | 3 |
| 153 | PC_O-44-6              | 0.31     | 0.02    | 8 | 0.32     | 0.03    | 3 | 0.30     | 0.01   | 3 | 0.40     | 0.02    | 3 | 0.38     | 0.00   | 3 |
| 154 | SM_32-2 OH             | 1.37     | 0.08    | 8 | 1.86     | 0.21    | 3 | 1.95     | 0.08   | 3 | 2.34     | 0.28    | 3 | 2.20     | 0.12   | 3 |
| 155 | SM_34-2 OH             | 0.36     | 0.02    | 8 | 0.50     | 0.05    | 3 | 0.48     | 0.02   | 3 | 0.59     | 0.06    | 3 | 0.56     | 0.02   | 3 |
| 156 | SM_40-2 OH             | 2.60     | 0.14    | 8 | 3.04     | 0.29    | 3 | 3.03     | 0.16   | 3 | 3.65     | 0.56    | 3 | 3.40     | 0.13   | 3 |
| 157 | SM_40-3 OH             | 1.88     | 0.08    | 8 | 2.19     | 0.25    | 3 | 2.23     | 0.18   | 3 | 3.07     | 0.31    | 3 | 2.63     | 0.15   | 3 |
| 158 | SM_42-2 OH             | 0.28     | 0.02    | 8 | 0.38     | 0.04    | 3 | 0.34     | 0.00   | 3 | 0.43     | 0.04    | 3 | 0.40     | 0.02   | 3 |
| 159 | SM_34-1                | 27.31    | 1.46    | 8 | 37.68    | 2.98    | 3 | 34.92    | 0.49   | 3 | 45.78    | 4.46    | 3 | 43.65    | 1.24   | 3 |
| 160 | SM_34-2                | 5.04     | 0.23    | 8 | 6.20     | 0.56    | 3 | 6.18     | 0.20   | 3 | 7.58     | 0.65    | 3 | 7.35     | 0.31   | 3 |
| 161 | SM_36-1                | 2.07     | 0.15    | 8 | 3.13     | 0.23    | 3 | 2.91     | 0.06   | 3 | 3.54     | 0.33    | 3 | 3.42     | 0.11   | 3 |
| 162 | SM_36-2                | 0.96     | 0.05    | 8 | 1.38     | 0.10    | 3 | 1.32     | 0.00   | 3 | 1.51     | 0.12    | 3 | 1.54     | 0.03   | 3 |
| 163 | SM_38-3                | 0.12     | 0.01    | 8 | 0.16     | 0.02    | 3 | 0.15     | 0.02   | 3 | 0.16     | 0.02    | 3 | 0.14     | 0.02   | 3 |
| 164 | SM_40-1                | 0.57     | 0.06    | 8 | 0.89     | 0.17    | 3 | 0.62     | 0.04   | 3 | 0.90     | 0.12    | 3 | 0.98     | 0.05   | 3 |
| 165 | SM_42-1                | 11.91    | 0.64    | 8 | 12.83    | 0.95    | 3 | 11.48    | 0.56   | 3 | 13.73    | 1.46    | 3 | 14.07    | 0.37   | 3 |
| 166 | SM_42-2                | 20.32    | 1.04    | 8 | 27.79    | 2.80    | 3 | 26.07    | 1.25   | 3 | 33.84    | 1.06    | 3 | 33.08    | 0.74   | 3 |
| 167 | SM_44-1                | 0.05     | 0.00    | 8 | 0.05     | 0.01    | 3 | 0.06     | 0.00   | 3 | 0.07     | 0.01    | 3 | 0.07     | 0.01   | 3 |
| 168 | H1                     | 16181.71 | 1304.15 | 8 | 13389.92 | 1226.39 | 3 | 10907.32 | 511.17 | 3 | 14621.15 | 1264.43 | 3 | 14524.56 | 50.52  | 3 |
| 169 | C2,C3 / CO             | 0.80     | 0.03    | 8 | 0.94     | 0.18    | 3 | 0.90     | 0.19   | 3 | 0.71     | 0.10    | 3 | 0.98     | 0.30   | 3 |
| 170 | AAA                    | 233.01   | 20.48   | 8 | 262.90   | 34.27   | 3 | 228.83   | 4.86   | 3 | 284.73   | 34.07   | 3 | 271.07   | 24.25  | 3 |
| 171 | BCAA                   | 489.86   | 54.88   | 8 | 560.60   | 35.92   | 3 | 499.17   | 25.94  | 3 | 564.93   | 84.14   | 3 | 611.33   | 25.76  | 3 |
| 172 | C2 / CO                | 0.78     | 0.03    | 8 | 0.91     | 0.18    | 3 | 0.88     | 0.19   | 3 | 0.69     | 0.10    | 3 | 0.96     | 0.30   | 3 |
| 173 | Cit / Arg              | 0.61     | 0.06    | 8 | 0.36     | 0.02    | 3 | 0.55     | 0.07   | 3 | 0.31     | 0.04    | 3 | 0.41     | 0.04   | 3 |
| 174 | CPT-I ratio            | 0.02     | 0.00    | 8 | 0.01     | 0.00    | 3 | 0.01     | 0.00   | 3 | 0.01     | 0.00    | 3 | 0.01     | 0.00   | 3 |
| 175 | Fisher ratio           | 2.09     | 0.09    | 8 | 2.17     | 0.13    | 3 | 2.18     | 0.09   | 3 | 1.97     | 0.06    | 3 | 2.28     | 0.13   | 3 |
| 176 | Glucogenic AA          | 841.74   | 64.10   | 8 | 953.33   | 100.60  | 3 | 939.00   | 38.42  | 3 | 1097.00  | 126.14  | 3 | 992.00   | 111.33 | 3 |
| 177 | Kynurenine / Trp       | 0.02     | 0.00    | 8 | 0.01     | 0.00    | 3 | 0.01     | 0.00   | 3 | 0.01     | 0.00    | 3 | 0.01     | 0.00   | 3 |
| 178 | Met-SO / Met           | 0.03     | 0.00    | 8 | 0.03     | 0.00    | 3 | 0.02     | 0.00   | 3 | 0.02     | 0.00    | 3 | 0.02     | 0.00   | 3 |
| 179 | MUFA_PC                | 296.52   | 18.50   | 8 | 228.08   | 9.17    | 3 | 210.96   | 13.06  | 3 | 260.45   | 17.81   | 3 | 263.55   | 8.60   | 3 |
| 180 | MUFA_PC / SFA_PC       | 7.39     | 0.34    | 8 | 6.18     | 0.05    | 3 | 5.90     | 0.13   | 3 | 5.94     | 0.13    | 3 | 6.38     | 0.39   | 3 |
| 181 | PUFA_PC                | 1745.67  | 92.05   | 8 | 1707.27  | 122.73  | 3 | 1627.74  | 133.13 | 3 | 1815.41  | 127.43  | 3 | 1817.00  | 95.26  | 3 |
| 182 | PUFA_PC / MUFA_PC      | 5.92     | 0.14    | 8 | 7.48     | 0.38    | 3 | 7.70     | 0.16   | 3 | 7.00     | 0.40    | 3 | 6.93     | 0.60   | 3 |
| 183 | PUFA_PC / SFA_PC       | 43.68    | 1.94    | 8 | 46.25    | 2.76    | 3 | 45.42    | 1.94   | 3 | 41.51    | 2.43    | 3 | 43.85    | 1.71   | 3 |
| 184 | SFA_PC                 | 40.32    | 2.23    | 8 | 36.90    | 1.43    | 3 | 35.72    | 1.40   | 3 | 43.79    | 2.19    | 3 | 41.46    | 1.67   | 3 |
| 185 | Total AC / CO          | 0.95     | 0.04    | 8 | 1.09     | 0.21    | 3 | 1.05     | 0.21   | 3 | 0.81     | 0.11    | 3 | 1.12     | 0.34   | 3 |
| 186 | Total AC-DC / Total AC | 0.01     | 0.00    | 8 | 0.01     | 0.00    | 3 | 0.01     | 0.00   | 3 | 0.01     | 0.00    | 3 | 0.01     | 0.00   | 3 |

|     |                               |         |        |   |         |        |   |         |        |   |         |        |   |         |       |   |
|-----|-------------------------------|---------|--------|---|---------|--------|---|---------|--------|---|---------|--------|---|---------|-------|---|
| 187 | Total AC-OH / Total AC        | 0.02    | 0.00   | 8 | 0.01    | 0.00   | 3 | 0.01    | 0.00   | 3 | 0.01    | 0.00   | 3 | 0.01    | 0.00  | 3 |
| 188 | Total LPC                     | 512.49  | 31.20  | 8 | 490.09  | 42.95  | 3 | 473.04  | 32.67  | 3 | 540.98  | 32.56  | 3 | 541.71  | 17.29 | 3 |
| 189 | Total LPC / Total PC          | 0.25    | 0.01   | 8 | 0.25    | 0.01   | 3 | 0.25    | 0.01   | 3 | 0.26    | 0.01   | 3 | 0.26    | 0.00  | 3 |
| 190 | Total PC                      | 2082.52 | 111.14 | 8 | 1972.25 | 130.69 | 3 | 1874.43 | 147.55 | 3 | 2119.66 | 140.69 | 3 | 2122.01 | 88.13 | 3 |
| 191 | Total PC_diacyl               | 1969.50 | 107.21 | 8 | 1854.35 | 126.06 | 3 | 1759.60 | 140.01 | 3 | 1976.20 | 133.25 | 3 | 1988.17 | 86.83 | 3 |
| 192 | Total PC_ether                | 113.01  | 4.56   | 8 | 117.90  | 8.09   | 3 | 114.82  | 7.66   | 3 | 143.46  | 9.05   | 3 | 133.84  | 2.85  | 3 |
| 193 | Total SM                      | 74.30   | 3.58   | 8 | 97.25   | 8.33   | 3 | 91.18   | 1.99   | 3 | 116.40  | 9.20   | 3 | 112.58  | 2.48  | 3 |
| 194 | Total SM / Total PC           | 0.04    | 0.00   | 8 | 0.05    | 0.00   | 3 | 0.05    | 0.00   | 3 | 0.05    | 0.00   | 3 | 0.05    | 0.00  | 3 |
| 195 | Total SM / Total_SM,PC        | 0.03    | 0.00   | 8 | 0.05    | 0.00   | 3 | 0.05    | 0.00   | 3 | 0.05    | 0.00   | 3 | 0.05    | 0.00  | 3 |
| 196 | Total SM-non OH               | 67.81   | 3.30   | 8 | 89.29   | 7.56   | 3 | 83.15   | 1.62   | 3 | 106.31  | 7.95   | 3 | 103.40  | 2.05  | 3 |
| 197 | Total SM-OH                   | 6.50    | 0.30   | 8 | 7.96    | 0.83   | 3 | 8.03    | 0.37   | 3 | 10.09   | 1.25   | 3 | 9.19    | 0.43  | 3 |
| 198 | Total SM-OH / Total SM-non OH | 0.10    | 0.00   | 8 | 0.09    | 0.00   | 3 | 0.10    | 0.00   | 3 | 0.09    | 0.00   | 3 | 0.09    | 0.00  | 3 |
| 199 | Total_PC,SM                   | 2156.82 | 112.99 | 8 | 2069.50 | 138.44 | 3 | 1965.61 | 149.46 | 3 | 2236.06 | 149.86 | 3 | 2234.60 | 90.27 | 3 |
| 200 | Tyr / Phe                     | 1.43    | 0.07   | 8 | 1.34    | 0.10   | 3 | 1.24    | 0.01   | 3 | 1.08    | 0.06   | 3 | 1.12    | 0.08  | 3 |

**Table S4.** Day 1 plasma metabolite concentrations. Values reported in  $\mu\text{M}$ .

|    |               | Sham  |      |   | 8 Gy  |      |   | 10 Gy |      |   | 12 Gy |      |   | 14 Gy |      |   |
|----|---------------|-------|------|---|-------|------|---|-------|------|---|-------|------|---|-------|------|---|
|    |               | Mean  | SEM  | N |
| 1  | C0            | 26.29 | 1.93 | 8 | 24.89 | 0.95 | 3 | 24.68 | 2.52 | 3 | 23.15 | 3.24 | 3 | 23.82 | 2.37 | 3 |
| 2  | C10           | 0.28  | 0.02 | 8 | 0.32  | 0.06 | 3 | 0.32  | 0.05 | 3 | 0.37  | 0.03 | 3 | 0.36  | 0.05 | 3 |
| 3  | C10-1         | 0.12  | 0.01 | 8 | 0.13  | 0.02 | 3 | 0.12  | 0.02 | 3 | 0.14  | 0.01 | 3 | 0.14  | 0.03 | 3 |
| 4  | C10-2         | 0.10  | 0.00 | 8 | 0.11  | 0.00 | 3 | 0.09  | 0.01 | 3 | 0.10  | 0.00 | 3 | 0.11  | 0.01 | 3 |
| 5  | C12           | 0.09  | 0.01 | 8 | 0.09  | 0.01 | 3 | 0.08  | 0.01 | 3 | 0.08  | 0.01 | 3 | 0.09  | 0.02 | 3 |
| 6  | C12-DC        | 0.15  | 0.00 | 8 | 0.16  | 0.01 | 3 | 0.15  | 0.01 | 3 | 0.17  | 0.01 | 3 | 0.16  | 0.01 | 3 |
| 7  | C12-1         | 0.07  | 0.00 | 8 | 0.08  | 0.01 | 3 | 0.07  | 0.01 | 3 | 0.08  | 0.01 | 3 | 0.07  | 0.01 | 3 |
| 8  | C14           | 0.15  | 0.02 | 8 | 0.11  | 0.01 | 3 | 0.10  | 0.01 | 3 | 0.12  | 0.01 | 3 | 0.11  | 0.02 | 3 |
| 9  | C14-1         | 0.10  | 0.01 | 8 | 0.08  | 0.01 | 3 | 0.07  | 0.01 | 3 | 0.08  | 0.01 | 3 | 0.09  | 0.02 | 3 |
| 10 | C14-1 OH      | 0.04  | 0.00 | 8 | 0.04  | 0.01 | 3 | 0.04  | 0.00 | 3 | 0.04  | 0.00 | 3 | 0.04  | 0.01 | 3 |
| 11 | C14-2         | 0.05  | 0.01 | 8 | 0.05  | 0.00 | 3 | 0.05  | 0.01 | 3 | 0.05  | 0.01 | 3 | 0.05  | 0.01 | 3 |
| 12 | C14-2 OH      | 0.03  | 0.00 | 8 | 0.03  | 0.01 | 3 | 0.03  | 0.00 | 3 | 0.03  | 0.00 | 3 | 0.04  | 0.01 | 3 |
| 13 | C16           | 0.29  | 0.04 | 8 | 0.16  | 0.02 | 3 | 0.17  | 0.02 | 3 | 0.19  | 0.02 | 3 | 0.19  | 0.03 | 3 |
| 14 | C16-OH        | 0.03  | 0.00 | 8 | 0.03  | 0.00 | 3 | 0.02  | 0.00 | 3 | 0.03  | 0.00 | 3 | 0.03  | 0.01 | 3 |
| 15 | C16-1         | 0.09  | 0.01 | 8 | 0.06  | 0.01 | 3 | 0.05  | 0.01 | 3 | 0.05  | 0.01 | 3 | 0.06  | 0.01 | 3 |
| 16 | C16-1 OH      | 0.03  | 0.00 | 8 | 0.03  | 0.00 | 3 | 0.03  | 0.00 | 3 | 0.03  | 0.00 | 3 | 0.03  | 0.00 | 3 |
| 17 | C16-2         | 0.03  | 0.01 | 8 | 0.03  | 0.00 | 3 | 0.02  | 0.00 | 3 | 0.02  | 0.00 | 3 | 0.03  | 0.01 | 3 |
| 18 | C16-2 OH      | 0.02  | 0.00 | 8 | 0.02  | 0.00 | 3 | 0.02  | 0.00 | 3 | 0.02  | 0.00 | 3 | 0.02  | 0.00 | 3 |
| 19 | C18           | 0.09  | 0.01 | 8 | 0.06  | 0.01 | 3 | 0.06  | 0.00 | 3 | 0.07  | 0.01 | 3 | 0.07  | 0.01 | 3 |
| 20 | C18-1         | 0.24  | 0.04 | 8 | 0.14  | 0.03 | 3 | 0.15  | 0.02 | 3 | 0.16  | 0.03 | 3 | 0.16  | 0.03 | 3 |
| 21 | C18-1 OH      | 0.03  | 0.00 | 8 | 0.03  | 0.00 | 3 | 0.03  | 0.00 | 3 | 0.03  | 0.00 | 3 | 0.03  | 0.01 | 3 |
| 22 | C18-2         | 0.13  | 0.03 | 8 | 0.08  | 0.01 | 3 | 0.08  | 0.02 | 3 | 0.09  | 0.02 | 3 | 0.09  | 0.02 | 3 |
| 23 | C2            | 20.68 | 2.07 | 8 | 17.47 | 1.41 | 3 | 20.28 | 1.17 | 3 | 21.16 | 4.35 | 3 | 22.88 | 3.44 | 3 |
| 24 | C3            | 0.54  | 0.06 | 8 | 0.49  | 0.02 | 3 | 0.57  | 0.08 | 3 | 0.49  | 0.06 | 3 | 0.50  | 0.02 | 3 |
| 25 | C3-DC C4-OH   | 0.14  | 0.01 | 8 | 0.10  | 0.01 | 3 | 0.09  | 0.00 | 3 | 0.09  | 0.01 | 3 | 0.11  | 0.02 | 3 |
| 26 | C3-OH         | 0.04  | 0.00 | 8 | 0.05  | 0.01 | 3 | 0.05  | 0.00 | 3 | 0.05  | 0.00 | 3 | 0.05  | 0.01 | 3 |
| 27 | C3-1          | 0.04  | 0.00 | 8 | 0.04  | 0.01 | 3 | 0.04  | 0.00 | 3 | 0.04  | 0.00 | 3 | 0.04  | 0.01 | 3 |
| 28 | C4            | 0.57  | 0.10 | 8 | 0.50  | 0.02 | 3 | 0.47  | 0.07 | 3 | 0.38  | 0.06 | 3 | 0.37  | 0.05 | 3 |
| 29 | C4-1          | 0.04  | 0.00 | 8 | 0.04  | 0.00 | 3 | 0.04  | 0.00 | 3 | 0.04  | 0.00 | 3 | 0.04  | 0.01 | 3 |
| 30 | C5            | 0.13  | 0.01 | 8 | 0.12  | 0.01 | 3 | 0.11  | 0.01 | 3 | 0.11  | 0.01 | 3 | 0.12  | 0.01 | 3 |
| 31 | C5-DC C6-OH   | 0.04  | 0.01 | 8 | 0.05  | 0.01 | 3 | 0.03  | 0.00 | 3 | 0.03  | 0.00 | 3 | 0.04  | 0.01 | 3 |
| 32 | C5-M-DC       | 0.05  | 0.01 | 8 | 0.07  | 0.02 | 3 | 0.05  | 0.00 | 3 | 0.07  | 0.00 | 3 | 0.08  | 0.01 | 3 |
| 33 | C5-OH C3-DC-M | 0.13  | 0.02 | 8 | 0.15  | 0.04 | 3 | 0.10  | 0.01 | 3 | 0.15  | 0.02 | 3 | 0.19  | 0.03 | 3 |

|    |            |        |        |   |        |        |   |         |        |   |        |        |   |         |        |   |
|----|------------|--------|--------|---|--------|--------|---|---------|--------|---|--------|--------|---|---------|--------|---|
| 34 | C5-1       | 0.04   | 0.00   | 8 | 0.04   | 0.00   | 3 | 0.04    | 0.00   | 3 | 0.04   | 0.00   | 3 | 0.04    | 0.00   | 3 |
| 35 | C5-1 DC    | 0.05   | 0.01   | 8 | 0.06   | 0.02   | 3 | 0.05    | 0.01   | 3 | 0.05   | 0.01   | 3 | 0.06    | 0.02   | 3 |
| 36 | C6_C4-1 DC | 0.11   | 0.01   | 8 | 0.11   | 0.02   | 3 | 0.10    | 0.02   | 3 | 0.11   | 0.02   | 3 | 0.12    | 0.03   | 3 |
| 37 | C6-1       | 0.04   | 0.00   | 8 | 0.04   | 0.01   | 3 | 0.04    | 0.00   | 3 | 0.04   | 0.00   | 3 | 0.05    | 0.01   | 3 |
| 38 | C7-DC      | 0.03   | 0.00   | 8 | 0.03   | 0.00   | 3 | 0.03    | 0.00   | 3 | 0.03   | 0.00   | 3 | 0.03    | 0.01   | 3 |
| 39 | C8         | 0.21   | 0.02   | 8 | 0.25   | 0.06   | 3 | 0.26    | 0.05   | 3 | 0.30   | 0.03   | 3 | 0.30    | 0.05   | 3 |
| 40 | C9         | 0.11   | 0.01   | 8 | 0.12   | 0.03   | 3 | 0.12    | 0.02   | 3 | 0.14   | 0.01   | 3 | 0.14    | 0.02   | 3 |
| 41 | Ala        | 447.75 | 43.72  | 8 | 467.33 | 20.09  | 3 | 350.67  | 20.37  | 3 | 331.00 | 25.03  | 3 | 302.33  | 25.33  | 3 |
| 42 | Arg        | 105.80 | 8.83   | 8 | 65.33  | 3.30   | 3 | 79.20   | 11.43  | 3 | 72.57  | 8.62   | 3 | 70.17   | 3.97   | 3 |
| 43 | Asn        | 74.78  | 8.90   | 8 | 63.93  | 1.76   | 3 | 70.57   | 5.28   | 3 | 68.33  | 8.14   | 3 | 61.00   | 1.02   | 3 |
| 44 | Asp        | 215.20 | 54.31  | 8 | 208.00 | 69.72  | 3 | 108.30  | 46.25  | 3 | 98.47  | 10.93  | 3 | 95.50   | 30.39  | 3 |
| 45 | Cit        | 62.98  | 7.01   | 8 | 13.97  | 1.39   | 3 | 10.93   | 1.83   | 3 | 7.67   | 1.58   | 3 | 7.97    | 2.19   | 3 |
| 46 | Gln        | 698.50 | 116.03 | 8 | 892.33 | 119.98 | 3 | 1363.00 | 353.55 | 3 | 975.53 | 129.16 | 3 | 1094.33 | 205.75 | 3 |
| 47 | Glu        | 65.18  | 7.98   | 8 | 56.57  | 6.63   | 3 | 36.40   | 10.19  | 3 | 46.87  | 6.05   | 3 | 42.97   | 3.12   | 3 |
| 48 | Gly        | 262.25 | 24.53  | 8 | 301.00 | 15.13  | 3 | 175.33  | 20.76  | 3 | 161.33 | 9.84   | 3 | 207.67  | 30.49  | 3 |
| 49 | His        | 73.18  | 5.43   | 8 | 79.67  | 1.36   | 3 | 82.60   | 4.71   | 3 | 78.93  | 10.17  | 3 | 79.43   | 4.91   | 3 |
| 50 | Ile        | 106.36 | 11.70  | 8 | 80.23  | 3.49   | 3 | 91.40   | 8.81   | 3 | 86.00  | 4.56   | 3 | 88.30   | 6.43   | 3 |
| 51 | Leu        | 179.50 | 20.98  | 8 | 162.00 | 7.51   | 3 | 185.33  | 7.31   | 3 | 168.67 | 10.40  | 3 | 173.33  | 19.92  | 3 |
| 52 | Met        | 62.84  | 4.89   | 8 | 57.87  | 5.74   | 3 | 60.40   | 4.19   | 3 | 46.67  | 5.25   | 3 | 47.27   | 1.60   | 3 |
| 53 | Phe        | 68.89  | 7.28   | 8 | 71.37  | 2.83   | 3 | 68.97   | 4.62   | 3 | 63.43  | 4.34   | 3 | 66.27   | 5.53   | 3 |
| 54 | Pro        | 103.91 | 17.62  | 8 | 87.77  | 10.20  | 3 | 78.73   | 4.17   | 3 | 65.87  | 5.14   | 3 | 62.67   | 3.82   | 3 |
| 55 | Ser        | 131.74 | 8.87   | 8 | 147.33 | 14.33  | 3 | 115.33  | 13.33  | 3 | 152.33 | 22.81  | 3 | 121.67  | 6.06   | 3 |
| 56 | Thr        | 174.13 | 15.83  | 8 | 188.33 | 16.34  | 3 | 179.33  | 8.88   | 3 | 175.33 | 19.60  | 3 | 157.00  | 14.93  | 3 |
| 57 | Trp        | 66.81  | 6.15   | 8 | 73.70  | 1.95   | 3 | 88.90   | 6.56   | 3 | 74.07  | 6.40   | 3 | 77.33   | 3.18   | 3 |
| 58 | Tyr        | 97.31  | 9.07   | 8 | 94.60  | 9.65   | 3 | 79.57   | 8.97   | 3 | 66.97  | 6.98   | 3 | 64.37   | 6.30   | 3 |
| 59 | Val        | 204.00 | 23.35  | 8 | 186.00 | 16.26  | 3 | 186.00  | 14.05  | 3 | 192.67 | 15.25  | 3 | 213.00  | 12.53  | 3 |
| 60 | Histamine  | 0.40   | 0.03   | 8 | 0.38   | 0.03   | 3 | 0.33    | 0.03   | 3 | 0.32   | 0.03   | 3 | 0.33    | 0.02   | 3 |
| 61 | Kynurenine | 1.03   | 0.10   | 8 | 1.26   | 0.08   | 3 | 1.64    | 0.22   | 3 | 2.00   | 0.08   | 3 | 1.86    | 0.19   | 3 |
| 62 | Met-SO     | 1.64   | 0.24   | 8 | 1.86   | 0.38   | 3 | 1.31    | 0.05   | 3 | 0.80   | 0.13   | 3 | 0.69    | 0.10   | 3 |
| 63 | total DMA  | 0.47   | 0.08   | 8 | 0.31   | 0.11   | 3 | 0.18    | 0.03   | 3 | 0.12   | 0.03   | 3 | 0.08    | 0.04   | 3 |
| 64 | LPC_14-0   | 2.60   | 0.12   | 8 | 2.77   | 0.15   | 3 | 2.66    | 0.14   | 3 | 2.54   | 0.10   | 3 | 2.64    | 0.29   | 3 |
| 65 | LPC_16-0   | 192.20 | 10.20  | 8 | 175.60 | 7.02   | 3 | 229.75  | 24.82  | 3 | 189.92 | 27.05  | 3 | 174.79  | 17.48  | 3 |
| 66 | LPC_16-1   | 5.40   | 0.43   | 8 | 3.77   | 0.22   | 3 | 3.75    | 0.40   | 3 | 2.68   | 0.43   | 3 | 2.33    | 0.26   | 3 |
| 67 | LPC_17-0   | 2.21   | 0.07   | 8 | 2.90   | 0.10   | 3 | 3.88    | 0.41   | 3 | 3.09   | 0.42   | 3 | 2.78    | 0.29   | 3 |
| 68 | LPC_18-0   | 74.33  | 3.60   | 8 | 85.05  | 5.80   | 3 | 131.29  | 9.62   | 3 | 114.05 | 16.44  | 3 | 112.80  | 9.71   | 3 |
| 69 | LPC_18-1   | 44.34  | 3.53   | 8 | 34.58  | 0.96   | 3 | 36.30   | 3.05   | 3 | 27.65  | 4.49   | 3 | 24.55   | 2.84   | 3 |
| 70 | LPC_18-2   | 133.55 | 11.38  | 8 | 107.79 | 1.33   | 3 | 118.77  | 8.88   | 3 | 97.63  | 18.03  | 3 | 87.02   | 9.71   | 3 |
| 71 | LPC_20-3   | 8.68   | 0.75   | 8 | 6.20   | 0.27   | 3 | 5.35    | 0.52   | 3 | 3.96   | 0.69   | 3 | 3.70    | 0.34   | 3 |
| 72 | LPC_20-4   | 43.69  | 3.50   | 8 | 47.33  | 0.80   | 3 | 50.22   | 4.88   | 3 | 40.57  | 6.57   | 3 | 36.63   | 2.89   | 3 |
| 73 | LPC_24-0   | 1.16   | 0.05   | 8 | 1.33   | 0.07   | 3 | 1.62    | 0.25   | 3 | 1.48   | 0.23   | 3 | 1.47    | 0.04   | 3 |
| 74 | LPC_26-0   | 1.44   | 0.08   | 8 | 1.37   | 0.13   | 3 | 1.37    | 0.25   | 3 | 1.06   | 0.17   | 3 | 1.03    | 0.02   | 3 |
| 75 | LPC_26-1   | 0.90   | 0.06   | 8 | 1.08   | 0.04   | 3 | 1.07    | 0.25   | 3 | 0.86   | 0.16   | 3 | 0.83    | 0.03   | 3 |
| 76 | LPC_28-0   | 0.95   | 0.05   | 8 | 0.99   | 0.10   | 3 | 1.16    | 0.19   | 3 | 0.89   | 0.16   | 3 | 0.89    | 0.02   | 3 |
| 77 | LPC_28-1   | 1.04   | 0.06   | 8 | 1.26   | 0.09   | 3 | 1.35    | 0.27   | 3 | 1.14   | 0.22   | 3 | 1.06    | 0.05   | 3 |
| 78 | PC_24-0    | 0.55   | 0.04   | 8 | 0.69   | 0.08   | 3 | 0.69    | 0.12   | 3 | 0.56   | 0.08   | 3 | 0.65    | 0.02   | 3 |
| 79 | PC_26-0    | 4.62   | 0.38   | 8 | 3.88   | 0.30   | 3 | 3.98    | 0.81   | 3 | 2.99   | 0.41   | 3 | 3.18    | 0.06   | 3 |
| 80 | PC_28-1    | 1.04   | 0.05   | 8 | 0.97   | 0.08   | 3 | 0.88    | 0.07   | 3 | 0.74   | 0.12   | 3 | 0.76    | 0.02   | 3 |
| 81 | PC_30-0    | 1.16   | 0.06   | 8 | 0.95   | 0.04   | 3 | 0.93    | 0.08   | 3 | 0.85   | 0.13   | 3 | 0.89    | 0.01   | 3 |
| 82 | PC_30-2    | 0.31   | 0.02   | 8 | 0.37   | 0.05   | 3 | 0.27    | 0.03   | 3 | 0.24   | 0.04   | 3 | 0.21    | 0.02   | 3 |
| 83 | PC_32-0    | 19.73  | 1.75   | 8 | 17.81  | 0.27   | 3 | 17.79   | 1.17   | 3 | 17.95  | 2.01   | 3 | 18.32   | 0.84   | 3 |
| 84 | PC_32-1    | 12.01  | 1.12   | 8 | 6.43   | 0.52   | 3 | 4.86    | 0.49   | 3 | 4.81   | 0.66   | 3 | 5.02    | 0.33   | 3 |

|     |           |        |       |   |        |       |   |        |       |   |        |       |   |        |       |   |
|-----|-----------|--------|-------|---|--------|-------|---|--------|-------|---|--------|-------|---|--------|-------|---|
| 85  | PC_32-2   | 2.82   | 0.19  | 8 | 1.93   | 0.11  | 3 | 1.34   | 0.12  | 3 | 1.32   | 0.17  | 3 | 1.12   | 0.04  | 3 |
| 86  | PC_32-3   | 0.44   | 0.03  | 8 | 0.41   | 0.02  | 3 | 0.40   | 0.05  | 3 | 0.38   | 0.05  | 3 | 0.39   | 0.01  | 3 |
| 87  | PC_34-1   | 214.13 | 14.52 | 8 | 132.95 | 4.60  | 3 | 120.33 | 3.69  | 3 | 118.61 | 16.08 | 3 | 119.64 | 10.03 | 3 |
| 88  | PC_34-2   | 324.19 | 36.22 | 8 | 351.53 | 56.41 | 3 | 353.78 | 46.51 | 3 | 343.02 | 23.31 | 3 | 352.14 | 43.72 | 3 |
| 89  | PC_34-3   | 40.00  | 2.52  | 8 | 26.86  | 2.42  | 3 | 20.21  | 0.82  | 3 | 18.98  | 3.18  | 3 | 17.04  | 1.97  | 3 |
| 90  | PC_34-4   | 1.38   | 0.08  | 8 | 1.13   | 0.08  | 3 | 0.80   | 0.07  | 3 | 0.76   | 0.12  | 3 | 0.65   | 0.06  | 3 |
| 91  | PC_36-0   | 2.09   | 0.09  | 8 | 2.34   | 0.14  | 3 | 2.76   | 0.21  | 3 | 2.66   | 0.15  | 3 | 2.66   | 0.26  | 3 |
| 92  | PC_36-1   | 48.49  | 2.71  | 8 | 33.31  | 2.01  | 3 | 37.06  | 1.80  | 3 | 36.98  | 6.88  | 3 | 39.97  | 3.32  | 3 |
| 93  | PC_36-2   | 286.26 | 17.20 | 8 | 260.04 | 19.27 | 3 | 274.99 | 16.77 | 3 | 277.47 | 27.66 | 3 | 289.90 | 27.08 | 3 |
| 94  | PC_36-3   | 144.30 | 7.62  | 8 | 117.46 | 3.31  | 3 | 94.96  | 4.63  | 3 | 88.30  | 13.77 | 3 | 84.47  | 7.78  | 3 |
| 95  | PC_36-4   | 268.76 | 14.22 | 8 | 250.72 | 14.91 | 3 | 227.76 | 22.97 | 3 | 224.84 | 25.57 | 3 | 220.41 | 17.40 | 3 |
| 96  | PC_36-5   | 16.97  | 1.05  | 8 | 13.35  | 0.61  | 3 | 10.14  | 1.03  | 3 | 11.01  | 2.09  | 3 | 9.63   | 0.78  | 3 |
| 97  | PC_36-6   | 0.81   | 0.04  | 8 | 0.65   | 0.04  | 3 | 0.49   | 0.06  | 3 | 0.48   | 0.08  | 3 | 0.43   | 0.02  | 3 |
| 98  | PC_38-0   | 2.36   | 0.10  | 8 | 1.96   | 0.06  | 3 | 1.98   | 0.16  | 3 | 1.96   | 0.34  | 3 | 2.01   | 0.15  | 3 |
| 99  | PC_38-1   | 0.90   | 0.05  | 8 | 0.74   | 0.08  | 3 | 0.77   | 0.02  | 3 | 0.71   | 0.10  | 3 | 0.85   | 0.07  | 3 |
| 100 | PC_38-3   | 41.65  | 2.40  | 8 | 33.88  | 1.35  | 3 | 31.35  | 1.16  | 3 | 30.12  | 4.90  | 3 | 31.77  | 1.40  | 3 |
| 101 | PC_38-4   | 171.13 | 7.31  | 8 | 182.81 | 9.16  | 3 | 191.09 | 14.46 | 3 | 199.01 | 22.17 | 3 | 201.83 | 11.58 | 3 |
| 102 | PC_38-5   | 68.43  | 3.58  | 8 | 63.61  | 1.33  | 3 | 51.62  | 4.08  | 3 | 50.28  | 8.66  | 3 | 46.30  | 2.54  | 3 |
| 103 | PC_38-6   | 207.32 | 10.93 | 8 | 178.70 | 3.27  | 3 | 187.62 | 16.90 | 3 | 200.73 | 26.19 | 3 | 200.38 | 17.17 | 3 |
| 104 | PC_40-1   | 0.43   | 0.01  | 8 | 0.38   | 0.00  | 3 | 0.38   | 0.01  | 3 | 0.34   | 0.04  | 3 | 0.33   | 0.00  | 3 |
| 105 | PC_40-2   | 0.59   | 0.03  | 8 | 0.40   | 0.01  | 3 | 0.34   | 0.01  | 3 | 0.33   | 0.06  | 3 | 0.31   | 0.01  | 3 |
| 106 | PC_40-3   | 1.08   | 0.05  | 8 | 0.67   | 0.04  | 3 | 0.53   | 0.02  | 3 | 0.51   | 0.09  | 3 | 0.48   | 0.02  | 3 |
| 107 | PC_40-4   | 4.88   | 0.21  | 8 | 3.70   | 0.21  | 3 | 3.15   | 0.10  | 3 | 3.10   | 0.47  | 3 | 3.08   | 0.17  | 3 |
| 108 | PC_40-5   | 8.77   | 0.52  | 8 | 6.43   | 0.50  | 3 | 5.51   | 0.31  | 3 | 5.66   | 0.93  | 3 | 5.18   | 0.09  | 3 |
| 109 | PC_40-6   | 69.42  | 5.57  | 8 | 60.93  | 1.42  | 3 | 74.35  | 3.58  | 3 | 86.30  | 13.04 | 3 | 91.80  | 6.74  | 3 |
| 110 | PC_42-0   | 0.39   | 0.02  | 8 | 0.29   | 0.02  | 3 | 0.28   | 0.02  | 3 | 0.27   | 0.05  | 3 | 0.27   | 0.01  | 3 |
| 111 | PC_42-1   | 0.26   | 0.01  | 8 | 0.21   | 0.01  | 3 | 0.20   | 0.01  | 3 | 0.20   | 0.03  | 3 | 0.20   | 0.01  | 3 |
| 112 | PC_42-2   | 0.33   | 0.01  | 8 | 0.26   | 0.00  | 3 | 0.25   | 0.01  | 3 | 0.24   | 0.03  | 3 | 0.24   | 0.01  | 3 |
| 113 | PC_42-4   | 0.41   | 0.02  | 8 | 0.33   | 0.01  | 3 | 0.30   | 0.00  | 3 | 0.30   | 0.05  | 3 | 0.30   | 0.01  | 3 |
| 114 | PC_42-5   | 0.59   | 0.03  | 8 | 0.43   | 0.02  | 3 | 0.40   | 0.03  | 3 | 0.39   | 0.07  | 3 | 0.37   | 0.03  | 3 |
| 115 | PC_42-6   | 1.74   | 0.09  | 8 | 1.24   | 0.09  | 3 | 1.03   | 0.04  | 3 | 1.06   | 0.16  | 3 | 1.04   | 0.08  | 3 |
| 116 | PC_O-30-0 | 0.29   | 0.01  | 8 | 0.28   | 0.03  | 3 | 0.26   | 0.01  | 3 | 0.25   | 0.03  | 3 | 0.25   | 0.01  | 3 |
| 117 | PC_O-30-1 | 1.02   | 0.10  | 8 | 0.90   | 0.10  | 3 | 0.83   | 0.11  | 3 | 0.68   | 0.12  | 3 | 0.73   | 0.04  | 3 |
| 118 | PC_O-30-2 | 0.22   | 0.01  | 8 | 0.23   | 0.02  | 3 | 0.22   | 0.02  | 3 | 0.20   | 0.03  | 3 | 0.21   | 0.02  | 3 |
| 119 | PC_O-32-1 | 1.50   | 0.08  | 8 | 1.51   | 0.10  | 3 | 1.59   | 0.10  | 3 | 1.48   | 0.21  | 3 | 1.61   | 0.04  | 3 |
| 120 | PC_O-32-2 | 0.71   | 0.04  | 8 | 0.62   | 0.04  | 3 | 0.54   | 0.05  | 3 | 0.49   | 0.07  | 3 | 0.51   | 0.00  | 3 |
| 121 | PC_O-34-0 | 0.68   | 0.03  | 8 | 0.67   | 0.02  | 3 | 0.68   | 0.06  | 3 | 0.63   | 0.08  | 3 | 0.61   | 0.03  | 3 |
| 122 | PC_O-34-1 | 5.62   | 0.26  | 8 | 4.59   | 0.04  | 3 | 4.57   | 0.21  | 3 | 4.48   | 0.52  | 3 | 4.62   | 0.34  | 3 |
| 123 | PC_O-34-2 | 7.31   | 0.36  | 8 | 6.04   | 0.18  | 3 | 5.28   | 0.32  | 3 | 5.26   | 0.79  | 3 | 5.04   | 0.49  | 3 |
| 124 | PC_O-34-3 | 1.97   | 0.12  | 8 | 1.54   | 0.05  | 3 | 1.48   | 0.11  | 3 | 1.44   | 0.20  | 3 | 1.43   | 0.07  | 3 |
| 125 | PC_O-36-0 | 0.66   | 0.02  | 8 | 0.60   | 0.02  | 3 | 0.61   | 0.03  | 3 | 0.60   | 0.08  | 3 | 0.60   | 0.03  | 3 |
| 126 | PC_O-36-1 | 3.41   | 0.14  | 8 | 2.67   | 0.11  | 3 | 2.42   | 0.15  | 3 | 2.31   | 0.26  | 3 | 2.35   | 0.13  | 3 |
| 127 | PC_O-36-2 | 14.14  | 0.66  | 8 | 13.33  | 0.11  | 3 | 12.19  | 0.71  | 3 | 11.86  | 1.80  | 3 | 11.87  | 0.90  | 3 |
| 128 | PC_O-36-3 | 3.86   | 0.15  | 8 | 3.34   | 0.11  | 3 | 2.72   | 0.19  | 3 | 2.56   | 0.40  | 3 | 2.41   | 0.22  | 3 |
| 129 | PC_O-36-4 | 6.98   | 0.32  | 8 | 5.80   | 0.12  | 3 | 5.22   | 0.37  | 3 | 5.02   | 0.75  | 3 | 5.43   | 0.46  | 3 |
| 130 | PC_O-36-5 | 2.96   | 0.14  | 8 | 2.66   | 0.03  | 3 | 2.66   | 0.23  | 3 | 2.73   | 0.31  | 3 | 2.83   | 0.21  | 3 |
| 131 | PC_O-38-0 | 6.15   | 0.30  | 8 | 5.14   | 0.40  | 3 | 4.19   | 0.38  | 3 | 4.22   | 0.75  | 3 | 3.82   | 0.37  | 3 |
| 132 | PC_O-38-1 | 1.15   | 0.04  | 8 | 0.90   | 0.02  | 3 | 0.86   | 0.05  | 3 | 0.79   | 0.08  | 3 | 0.83   | 0.06  | 3 |
| 133 | PC_O-38-2 | 8.84   | 0.48  | 8 | 7.43   | 0.11  | 3 | 6.90   | 0.53  | 3 | 6.73   | 1.16  | 3 | 7.18   | 0.63  | 3 |
| 134 | PC_O-38-3 | 2.41   | 0.09  | 8 | 2.17   | 0.08  | 3 | 1.84   | 0.15  | 3 | 1.65   | 0.27  | 3 | 1.64   | 0.11  | 3 |
| 135 | PC_O-38-4 | 7.68   | 0.29  | 8 | 8.68   | 0.03  | 3 | 7.72   | 0.75  | 3 | 7.59   | 1.09  | 3 | 7.33   | 0.37  | 3 |

|     |                        |          |         |   |          |        |   |          |        |   |          |         |   |          |         |   |
|-----|------------------------|----------|---------|---|----------|--------|---|----------|--------|---|----------|---------|---|----------|---------|---|
| 136 | PC_O-38-5              | 5.91     | 0.25    | 8 | 4.94     | 0.10   | 3 | 4.57     | 0.39   | 3 | 4.39     | 0.69    | 3 | 4.56     | 0.28    | 3 |
| 137 | PC_O-38-6              | 3.95     | 0.18    | 8 | 3.24     | 0.10   | 3 | 3.16     | 0.20   | 3 | 3.18     | 0.52    | 3 | 3.41     | 0.23    | 3 |
| 138 | PC_O-40-1              | 6.33     | 0.33    | 8 | 6.97     | 0.23   | 3 | 6.34     | 0.43   | 3 | 6.58     | 1.31    | 3 | 5.83     | 0.48    | 3 |
| 139 | PC_O-40-2              | 1.01     | 0.04    | 8 | 0.85     | 0.03   | 3 | 0.80     | 0.09   | 3 | 0.76     | 0.14    | 3 | 0.73     | 0.05    | 3 |
| 140 | PC_O-40-3              | 1.05     | 0.06    | 8 | 0.84     | 0.03   | 3 | 0.75     | 0.03   | 3 | 0.71     | 0.11    | 3 | 0.68     | 0.02    | 3 |
| 141 | PC_O-40-4              | 3.54     | 0.14    | 8 | 3.97     | 0.05   | 3 | 3.49     | 0.34   | 3 | 3.49     | 0.53    | 3 | 3.44     | 0.25    | 3 |
| 142 | PC_O-40-5              | 1.64     | 0.07    | 8 | 1.41     | 0.07   | 3 | 1.33     | 0.08   | 3 | 1.25     | 0.18    | 3 | 1.26     | 0.07    | 3 |
| 143 | PC_O-40-6              | 4.04     | 0.22    | 8 | 4.00     | 0.09   | 3 | 4.14     | 0.38   | 3 | 4.30     | 0.68    | 3 | 4.27     | 0.29    | 3 |
| 144 | PC_O-42-0              | 1.66     | 0.06    | 8 | 1.41     | 0.05   | 3 | 1.17     | 0.07   | 3 | 1.18     | 0.14    | 3 | 1.10     | 0.08    | 3 |
| 145 | PC_O-42-1              | 1.15     | 0.04    | 8 | 1.34     | 0.05   | 3 | 1.05     | 0.02   | 3 | 1.10     | 0.19    | 3 | 0.96     | 0.03    | 3 |
| 146 | PC_O-42-2              | 0.74     | 0.03    | 8 | 0.64     | 0.03   | 3 | 0.52     | 0.02   | 3 | 0.51     | 0.08    | 3 | 0.46     | 0.03    | 3 |
| 147 | PC_O-42-3              | 1.97     | 0.09    | 8 | 1.93     | 0.11   | 3 | 1.86     | 0.11   | 3 | 1.85     | 0.37    | 3 | 1.69     | 0.10    | 3 |
| 148 | PC_O-42-4              | 0.46     | 0.02    | 8 | 0.35     | 0.01   | 3 | 0.29     | 0.03   | 3 | 0.32     | 0.07    | 3 | 0.30     | 0.02    | 3 |
| 149 | PC_O-42-5              | 0.88     | 0.03    | 8 | 0.81     | 0.03   | 3 | 0.77     | 0.04   | 3 | 0.78     | 0.09    | 3 | 0.78     | 0.03    | 3 |
| 150 | PC_O-44-3              | 0.24     | 0.01    | 8 | 0.22     | 0.01   | 3 | 0.23     | 0.02   | 3 | 0.25     | 0.05    | 3 | 0.22     | 0.01    | 3 |
| 151 | PC_O-44-4              | 0.24     | 0.01    | 8 | 0.21     | 0.01   | 3 | 0.17     | 0.00   | 3 | 0.18     | 0.02    | 3 | 0.16     | 0.00    | 3 |
| 152 | PC_O-44-5              | 0.36     | 0.02    | 8 | 0.30     | 0.02   | 3 | 0.31     | 0.01   | 3 | 0.29     | 0.05    | 3 | 0.28     | 0.02    | 3 |
| 153 | PC_O-44-6              | 0.31     | 0.02    | 8 | 0.24     | 0.01   | 3 | 0.21     | 0.02   | 3 | 0.22     | 0.04    | 3 | 0.21     | 0.01    | 3 |
| 154 | SM_32-2 OH             | 1.37     | 0.08    | 8 | 1.49     | 0.12   | 3 | 2.21     | 0.33   | 3 | 2.13     | 0.27    | 3 | 2.08     | 0.04    | 3 |
| 155 | SM_34-2 OH             | 0.36     | 0.02    | 8 | 0.39     | 0.03   | 3 | 0.58     | 0.07   | 3 | 0.53     | 0.08    | 3 | 0.53     | 0.03    | 3 |
| 156 | SM_40-2 OH             | 2.60     | 0.14    | 8 | 2.65     | 0.11   | 3 | 3.82     | 0.70   | 3 | 3.68     | 0.58    | 3 | 3.19     | 0.15    | 3 |
| 157 | SM_40-3 OH             | 1.88     | 0.08    | 8 | 1.98     | 0.08   | 3 | 2.70     | 0.45   | 3 | 2.46     | 0.36    | 3 | 2.29     | 0.05    | 3 |
| 158 | SM_42-2 OH             | 0.28     | 0.02    | 8 | 0.29     | 0.01   | 3 | 0.39     | 0.05   | 3 | 0.37     | 0.06    | 3 | 0.32     | 0.00    | 3 |
| 159 | SM_34-1                | 27.31    | 1.46    | 8 | 29.06    | 1.19   | 3 | 42.04    | 4.44   | 3 | 40.88    | 6.08    | 3 | 40.51    | 1.41    | 3 |
| 160 | SM_34-2                | 5.04     | 0.23    | 8 | 4.94     | 0.09   | 3 | 6.63     | 0.60   | 3 | 6.22     | 0.99    | 3 | 6.20     | 0.30    | 3 |
| 161 | SM_36-1                | 2.07     | 0.15    | 8 | 2.42     | 0.09   | 3 | 3.85     | 0.56   | 3 | 3.46     | 0.54    | 3 | 3.56     | 0.15    | 3 |
| 162 | SM_36-2                | 0.96     | 0.05    | 8 | 1.06     | 0.04   | 3 | 1.56     | 0.18   | 3 | 1.41     | 0.21    | 3 | 1.43     | 0.08    | 3 |
| 163 | SM_38-3                | 0.12     | 0.01    | 8 | 0.10     | 0.01   | 3 | 0.15     | 0.02   | 3 | 0.11     | 0.03    | 3 | 0.12     | 0.01    | 3 |
| 164 | SM_40-1                | 0.57     | 0.06    | 8 | 0.54     | 0.03   | 3 | 0.71     | 0.15   | 3 | 0.50     | 0.17    | 3 | 0.50     | 0.06    | 3 |
| 165 | SM_42-1                | 11.91    | 0.64    | 8 | 8.82     | 0.39   | 3 | 10.77    | 0.86   | 3 | 10.83    | 2.10    | 3 | 9.54     | 0.88    | 3 |
| 166 | SM_42-2                | 20.32    | 1.04    | 8 | 22.34    | 0.56   | 3 | 29.37    | 3.43   | 3 | 28.02    | 4.57    | 3 | 25.97    | 1.19    | 3 |
| 167 | SM_44-1                | 0.05     | 0.00    | 8 | 0.05     | 0.01   | 3 | 0.06     | 0.01   | 3 | 0.06     | 0.01    | 3 | 0.05     | 0.01    | 3 |
| 168 | H1                     | 16181.71 | 1304.15 | 8 | 12417.13 | 842.46 | 3 | 12271.75 | 696.04 | 3 | 10674.50 | 1195.74 | 3 | 11067.93 | 1124.44 | 3 |
| 169 | C2,C3 / CO             | 0.80     | 0.03    | 8 | 0.73     | 0.08   | 3 | 0.87     | 0.14   | 3 | 0.93     | 0.14    | 3 | 1.01     | 0.22    | 3 |
| 170 | AAA                    | 233.01   | 20.48   | 8 | 239.67   | 12.85  | 3 | 237.43   | 20.14  | 3 | 204.47   | 16.91   | 3 | 207.97   | 14.58   | 3 |
| 171 | BCAA                   | 489.86   | 54.88   | 8 | 428.23   | 15.80  | 3 | 462.73   | 29.92  | 3 | 447.33   | 29.48   | 3 | 474.63   | 37.68   | 3 |
| 172 | C2 / CO                | 0.78     | 0.03    | 8 | 0.71     | 0.08   | 3 | 0.85     | 0.14   | 3 | 0.91     | 0.14    | 3 | 0.99     | 0.22    | 3 |
| 173 | Cit / Arg              | 0.61     | 0.06    | 8 | 0.21     | 0.02   | 3 | 0.14     | 0.00   | 3 | 0.10     | 0.01    | 3 | 0.11     | 0.03    | 3 |
| 174 | CPT-I ratio            | 0.02     | 0.00    | 8 | 0.01     | 0.00   | 3 | 0.01     | 0.00   | 3 | 0.01     | 0.00    | 3 | 0.01     | 0.00    | 3 |
| 175 | Fisher ratio           | 2.09     | 0.09    | 8 | 1.79     | 0.03   | 3 | 1.96     | 0.04   | 3 | 2.20     | 0.06    | 3 | 2.28     | 0.07    | 3 |
| 176 | Glucogenic AA          | 841.74   | 64.10   | 8 | 915.67   | 9.21   | 3 | 641.33   | 47.81  | 3 | 644.67   | 43.76   | 3 | 631.67   | 52.39   | 3 |
| 177 | Kynurenine / Trp       | 0.02     | 0.00    | 8 | 0.02     | 0.00   | 3 | 0.02     | 0.00   | 3 | 0.03     | 0.00    | 3 | 0.02     | 0.00    | 3 |
| 178 | Met-SO / Met           | 0.03     | 0.00    | 8 | 0.03     | 0.00   | 3 | 0.02     | 0.00   | 3 | 0.02     | 0.00    | 3 | 0.01     | 0.00    | 3 |
| 179 | MUFA_PC                | 296.52   | 18.50   | 8 | 193.15   | 7.19   | 3 | 181.38   | 4.20   | 3 | 179.10   | 26.34   | 3 | 182.85   | 13.97   | 3 |
| 180 | MUFA_PC / SFA_PC       | 7.39     | 0.34    | 8 | 5.36     | 0.16   | 3 | 5.19     | 0.30   | 3 | 5.21     | 0.15    | 3 | 5.32     | 0.25    | 3 |
| 181 | PUFA_PC                | 1745.67  | 92.05   | 8 | 1633.26  | 96.15  | 3 | 1601.77  | 133.13 | 3 | 1612.61  | 171.71  | 3 | 1627.58  | 140.50  | 3 |
| 182 | PUFA_PC / MUFA_PC      | 5.92     | 0.14    | 8 | 8.51     | 0.75   | 3 | 8.81     | 0.53   | 3 | 9.12     | 0.40    | 3 | 8.90     | 0.35    | 3 |
| 183 | PUFA_PC / SFA_PC       | 43.68    | 1.94    | 8 | 45.41    | 3.01   | 3 | 45.39    | 0.55   | 3 | 47.44    | 0.96    | 3 | 47.20    | 1.83    | 3 |
| 184 | SFA_PC                 | 40.32    | 2.23    | 8 | 36.01    | 0.29   | 3 | 35.30    | 2.99   | 3 | 34.13    | 4.21    | 3 | 34.35    | 1.72    | 3 |
| 185 | Total AC / CO          | 0.95     | 0.04    | 8 | 0.87     | 0.08   | 3 | 1.01     | 0.16   | 3 | 1.09     | 0.15    | 3 | 1.17     | 0.26    | 3 |
| 186 | Total AC-DC / Total AC | 0.01     | 0.00    | 8 | 0.02     | 0.00   | 3 | 0.01     | 0.00   | 3 | 0.01     | 0.00    | 3 | 0.01     | 0.00    | 3 |

|     |                               |         |        |   |         |       |   |         |        |   |         |        |   |         |        |   |
|-----|-------------------------------|---------|--------|---|---------|-------|---|---------|--------|---|---------|--------|---|---------|--------|---|
| 187 | Total AC-OH / Total AC        | 0.02    | 0.00   | 8 | 0.02    | 0.00  | 3 | 0.01    | 0.00   | 3 | 0.01    | 0.00   | 3 | 0.01    | 0.00   | 3 |
| 188 | Total LPC                     | 512.49  | 31.20  | 8 | 472.00  | 10.38 | 3 | 588.53  | 53.48  | 3 | 487.50  | 74.49  | 3 | 452.52  | 43.25  | 3 |
| 189 | Total LPC / Total PC          | 0.25    | 0.01   | 8 | 0.25    | 0.01  | 3 | 0.32    | 0.01   | 3 | 0.26    | 0.02   | 3 | 0.25    | 0.01   | 3 |
| 190 | Total PC                      | 2082.52 | 111.14 | 8 | 1862.41 | 90.10 | 3 | 1818.45 | 140.14 | 3 | 1825.84 | 202.19 | 3 | 1844.79 | 154.51 | 3 |
| 191 | Total PC_diacyl               | 1969.50 | 107.21 | 8 | 1759.62 | 91.42 | 3 | 1724.52 | 134.02 | 3 | 1733.52 | 188.34 | 3 | 1753.15 | 148.31 | 3 |
| 192 | Total PC_ether                | 113.01  | 4.56   | 8 | 102.79  | 1.60  | 3 | 93.93   | 6.48   | 3 | 92.31   | 14.15  | 3 | 91.63   | 6.20   | 3 |
| 193 | Total SM                      | 74.30   | 3.58   | 8 | 75.63   | 2.08  | 3 | 104.21  | 11.66  | 3 | 100.23  | 15.82  | 3 | 95.85   | 3.89   | 3 |
| 194 | Total SM / Total PC           | 0.04    | 0.00   | 8 | 0.04    | 0.00  | 3 | 0.06    | 0.00   | 3 | 0.05    | 0.00   | 3 | 0.05    | 0.00   | 3 |
| 195 | Total SM / Total_SM,PC        | 0.03    | 0.00   | 8 | 0.04    | 0.00  | 3 | 0.05    | 0.00   | 3 | 0.05    | 0.00   | 3 | 0.05    | 0.00   | 3 |
| 196 | Total SM-non OH               | 67.81   | 3.30   | 8 | 68.84   | 1.81  | 3 | 94.52   | 10.08  | 3 | 91.07   | 14.48  | 3 | 87.44   | 3.66   | 3 |
| 197 | Total SM-OH                   | 6.50    | 0.30   | 8 | 6.79    | 0.30  | 3 | 9.69    | 1.60   | 3 | 9.16    | 1.34   | 3 | 8.41    | 0.23   | 3 |
| 198 | Total SM-OH / Total SM-non OH | 0.10    | 0.00   | 8 | 0.10    | 0.00  | 3 | 0.10    | 0.01   | 3 | 0.10    | 0.00   | 3 | 0.10    | 0.00   | 3 |
| 199 | Total_PC,SM                   | 2156.82 | 112.99 | 8 | 1938.04 | 89.75 | 3 | 1922.66 | 151.80 | 3 | 1926.06 | 217.11 | 3 | 1940.64 | 157.58 | 3 |
| 200 | Tyr / Phe                     | 1.43    | 0.07   | 8 | 1.32    | 0.09  | 3 | 1.15    | 0.05   | 3 | 1.05    | 0.05   | 3 | 0.97    | 0.01   | 3 |

**Table S5.** Day 3 plasma metabolite concentrations. Values reported in  $\mu\text{M}$ .
